# Supplementary material for: Comparative transcriptomic analysis of Lactiplantibacillus plantarum RS66CD biofilm in high-salt conditions and planktonic cells
Source: PeerJ. 2020 Aug 3;8:e9639. doi: 10.7717/peerj.9639 (PMC7409786; doi:10.7717/peerj.9639)
Supplement: Supplemental Information 1 [file peerj-08-9639-s001.xlsx]

## Sheet: Sheet1
Gene	FS_L_p1	FS_L_p2	FS_L_p3	Na_B_L_p1	Na_B_L_p2	Na_B_L_p3	logFC	type	pvalue	qvalue	func
gene2	1877.82	1722.97	1849	3181.55	4127.59	5195.23	1.19816	up	0.0132805	0.0438008	Dbxref=GeneID:1061118; Name=lp_0004; func=MULTISPECIES: S4 domain-containing protein YaaA
gene4	1687.05	1630.38	1627.9	2423.41	2623.28	3762.72	0.832973	up	0.0861421	0.188373	Dbxref=GeneID:1061120; Name=gyrB; func=MULTISPECIES: DNA topoisomerase (ATP-hydrolyzing) subunit B
gene8	6816.22	7342.96	7478.27	17408.9	15690.3	17051.3	1.21273	up	0.0116151	0.0396097	Dbxref=GeneID:1061125; Name=rpsR; func=MULTISPECIES: 30S ribosomal protein S18
gene15	713.032	708.552	710.27	113.345	94.498	213.776	-2.33809	down	1.02e-06	1.5e-05	Dbxref=GeneID:1061288; Name=lp_0018; func=MULTISPECIES: peptide ABC transporter substrate-binding protein
gene22	9676.5	9600.57	9573.5	3056.13	3976.29	4439.42	-1.3305	down	0.0034153	0.0149253	Dbxref=GeneID:1061254; Name=lp_0026; func=MULTISPECIES: Cof-type HAD-IIB family hydrolase
gene25	529.513	510.347	469.56	1502.86	1647.14	1380.37	1.58563	up	0.0011204	0.00606611	Dbxref=GeneID:1061251; Name=lp_0030; func=MULTISPECIES: pyridoxamine 5'-phosphate oxidase family protein
gene26	1975.8	1669.42	1945.18	4891.4	5315.84	7530.82	1.66583	up	0.000589064	0.00355972	Dbxref=GeneID:1061250; Name=cspL; func=cold-shock DNA-binding domain protein
gene36	42.258	42.086	69.875	135.664	154.419	101.651	1.34488	up	0.00972362	0.0345428	Dbxref=GeneID:1061236; Name=lp_0046; func=TetR/AcrR family transcriptional regulator
gene46	1521.66	1422.62	1569.03	110.06	238.237	434.358	-2.52773	down	1.92e-07	3.35e-06	Dbxref=GeneID:1061223; Name=lp_0058; func=MULTISPECIES: flavoprotein
gene51	741.459	738.441	790.773	244.195	317.004	297.867	-1.40228	down	0.00221552	0.010576	Dbxref=GeneID:1061282; Name=lp_0063; func=hypothetical protein
gene72	2597.5	2507.74	2590.68	614.033	917.503	642.802	-1.82352	down	9.57e-05	0.000767729	Dbxref=GeneID:1061380; Name=lp_0091; func=MULTISPECIES: pyridoxamine 5'-phosphate oxidase
gene74	175.935	176.92	178.241	9.472	24.327	37.032	-2.90647	down	2.97e-08	6.04e-07	Dbxref=GeneID:1061377; Name=lp_0096; func=MULTISPECIES: hypothetical protein
gene77	315.859	354.993	352.428	890.427	909.433	975.541	1.43949	up	0.00302648	0.0134776	Dbxref=GeneID:1061374; Name=lp_0100; func=cobalt ABC transporter, ATP-binding protein
gene87	319.615	301.355	296.892	47.94	60.631	114.364	-2.04164	down	2.12e-05	0.000216481	Dbxref=GeneID:1061360; Name=lp_0111; func=alcohol dehydrogenase
gene94	998.21	1004.98	943.027	232.27	249.37	254.203	-2.00139	down	2.6e-05	0.000258563	Dbxref=GeneID:1061351; Name=lp_0119; func=NUDIX domain-containing protein
gene95	103.237	128.054	127.42	749.417	576.428	742.405	2.52751	up	3.81e-07	6.25e-06	Dbxref=GeneID:1061349; Name=lp_0120; func=MULTISPECIES: amino acid permease
gene102	178.378	185.727	209.246	44.961	72.172	60.971	-1.68668	down	0.000671056	0.00397128	Dbxref=GeneID:1061341; Name=lp_0128; func=MarR family transcriptional regulator
gene103	133920	146173	105748	3886.12	6639.77	50474.9	-2.66111	down	3.03e-08	6.12e-07	Dbxref=GeneID:1061340; Name=hsp1; func=Hsp20/alpha crystallin family protein
gene106	686.776	649.833	705.308	282.31	282.076	233.172	-1.35626	down	0.00309915	0.0137794	Dbxref=GeneID:1061337; Name=lp_0132; func=MFS family major facilitator transporter
gene110	6794.28	6503.56	7190.44	1907.38	2716.93	2206.39	-1.58469	down	0.000574007	0.00350644	Dbxref=GeneID:1061331; Name=lp_0137; func=MULTISPECIES: aldo/keto reductase
gene113	42.545	42.372	60.114	15.728	16.831	19.851	-1.46839	down	0.0055044	0.0219461	Dbxref=GeneID:1061328; Name=lp_0141; func=extracellular protein, partial
gene116	62.529	82.02	49.626	262.166	274.221	346.284	2.1845	up	1.51e-05	0.000160172	Dbxref=GeneID:1061321; Name=lp_0148; func=MULTISPECIES: energy-coupling factor transporter transmembrane protein EcfT
gene119	902.296	916.418	940.243	346.771	351.481	354.912	-1.38939	down	0.00253864	0.011543	Dbxref=GeneID:1061317; Name=lp_0152; func=Transcription regulator
gene125	129.783	141.763	147.188	58.812	52.172	43.338	-1.44007	down	0.00259094	0.0117618	Dbxref=GeneID:1061311; Name=lp_0160; func=ABC transporter, ATP-binding protein
gene129	252.221	236.272	210.15	2766.76	2196.18	1230.61	3.14813	up	6.54e-10	1.96e-08	Dbxref=GeneID:1061304; Name=lp_0164; func=MULTISPECIES: folate family ECF transporter S component
gene132	26.93	24.266	11.511	189.151	205.464	179.586	3.1948	up	3.56e-09	9.17e-08	Dbxref=GeneID:1061299; Name=dak1B; func=MULTISPECIES: dihydroxyacetone kinase subunit DhaK
gene133	15.408	13.153	14.819	207.501	215.525	143.166	3.7061	up	3.13e-10	9.76e-09	Dbxref=GeneID:1061298; Name=dak2; func=MULTISPECIES: dihydroxyacetone kinase subunit L
gene134	13.887	13.831	7.791	169.414	194.69	90.526	3.67832	up	1.21e-08	2.67e-07	Dbxref=GeneID:1061297; Name=dak3; func=MULTISPECIES: PTS-dependent dihydroxyacetone kinase phosphotransferase subunit DhaM
gene135	23.523	59.468	40.605	234.788	193.275	138.892	2.19757	up	2.56e-05	0.000254715	Dbxref=GeneID:1061296; Name=dhaP; func=MULTISPECIES: aquaporin family protein
gene139	356.537	477.178	332.42	56.649	52.742	162.522	-2.10051	down	1.06e-05	0.000118627	Dbxref=GeneID:1061463; Name=mdxE; func=extracellular solute-binding protein
gene140	70.509	73.189	51.257	13.216	7.956	22.403	-2.16149	down	2.7e-05	0.000265976	Dbxref=GeneID:1061462; Name=mdxF; func=MULTISPECIES: sugar ABC transporter permease
gene141	49.217	95.149	87.708	0	16.751	22.901	-2.54903	down	2.22e-06	2.95e-05	Dbxref=GeneID:1061461; Name=mdxG; func=MULTISPECIES: sugar ABC transporter permease
gene142	110.996	121.292	102.056	8.549	10.978	40.198	-2.48487	down	2.04e-06	2.78e-05	Dbxref=GeneID:1061460; Name=lp_0178; func=sugar ABC transporter
gene143	80.37	82.936	74.968	15.035	12.929	25.816	-2.14742	down	2.31e-05	0.000234351	Dbxref=GeneID:1061459; Name=malS; func=MULTISPECIES: alpha-amylase
gene144	104.153	106.034	114.267	23.102	13.391	46.45	-1.96778	down	7.44e-05	0.00062064	Dbxref=GeneID:1061458; Name=msmX; func=MULTISPECIES: ABC transporter ATP-binding protein
gene145	143.847	130.34	123.425	34.409	33.14	65.943	-1.57459	down	0.000782625	0.00448811	Dbxref=GeneID:1061457; Name=mapB; func=MULTISPECIES: glycoside hydrolase family 65 protein
gene148	639.802	709.305	702.964	201.562	211.756	241.993	-1.64682	down	0.000415248	0.00267862	Dbxref=GeneID:1061449; Name=sacK1; func=MULTISPECIES: ROK family protein
gene149	36.677	38.485	47.767	5.811	17.49	10.17	-1.87675	down	0.000198508	0.00141217	Dbxref=GeneID:1061447; Name=pts1BCA; func=MULTISPECIES: PTS beta-glucoside transporter subunit IIBCA
gene155	492.841	448.154	490.306	121.368	106.948	172.193	-1.83741	down	8.9e-05	0.000722909	Dbxref=GeneID:1061438; Name=lp_0193; func=MULTISPECIES: alpha-glucosidase
gene158	820.621	871.767	801.414	296.626	366.581	372.656	-1.26751	down	0.00557369	0.0221051	Dbxref=GeneID:1061435; Name=lp_0199; func=MULTISPECIES: XRE family transcriptional regulator
gene161	25.968	37.356	22.662	159.997	123.278	210.488	2.5216	up	6.22e-06	7.57e-05	Dbxref=GeneID:1061428; Name=lp_0202; func=GNAT family N-acetyltransferase
gene162	38.03	46.533	47.549	130.147	113.162	217.11	1.80116	up	0.000352837	0.0023274	Dbxref=GeneID:1061427; Name=serA; func=MULTISPECIES: D-3-phosphoglycerate dehydrogenase
gene163	10.735	22.571	22.753	59.529	56.273	97.152	1.92547	up	0.000270527	0.00186319	Dbxref=GeneID:1061425; Name=serC; func=MULTISPECIES: phosphoserine aminotransferase
gene165	4367.32	4331.83	4323.18	918.477	1166.24	1851.05	-1.72627	down	0.000190678	0.00136685	Dbxref=GeneID:1061423; Name=lp_0206; func=oxidoreductase
gene166	969.467	971.268	1042.46	2892.74	3446.66	1677.14	1.42612	up	0.00331275	0.0145906	Dbxref=GeneID:1061422; Name=lp_0207; func=MULTISPECIES: hypothetical protein
gene170	124.093	167.208	135.143	420.969	493.816	346.456	1.56441	up	0.00197381	0.00964592	Dbxref=GeneID:1061416; Name=lp_0213; func=hypothetical protein IV39_GL000026
gene171	26.689	66.451	82.353	244.195	234.598	201.347	1.9544	up	0.000217004	0.00152445	Dbxref=GeneID:1061414; Name=lp_0214; func=chromosome condensation protein CrcB
gene172	214.777	205.514	208.857	833.219	710.735	457.006	1.66922	up	0.000570189	0.00350031	Dbxref=GeneID:1061413; Name=lp_0215; func=ABC transporter ATP-binding protein
gene174	23.292	15.465	28.313	38.748	44.922	131.365	1.68079	up	0.00205152	0.00999094	Dbxref=GeneID:1061411; Name=lp_0217; func=energy-coupling factor transporter transmembrane protein EcfT
gene175	32.778	43.526	29.627	72.705	79.426	208.071	1.76565	up	0.000469494	0.00298479	Dbxref=GeneID:1061410; Name=lp_0218; func=ABC transporter ATP-binding protein
gene176	44.95	64.913	45.393	112.166	54.015	204.784	1.25662	up	0.015099	0.0486561	Dbxref=GeneID:1061408; Name=lp_0219; func=hypothetical protein HMPREF0531_10290
gene182	7444.26	7204.9	7605.89	821.817	1311.21	1906.6	-2.46184	down	2.57e-07	4.4e-06	Dbxref=GeneID:1061399; Name=nagB; func=MULTISPECIES: glucosamine-6-phosphate deaminase
gene183	940.907	876.708	1013.1	349.172	329.374	499.111	-1.26525	down	0.00541816	0.021719	Dbxref=GeneID:1061398; Name=pepD1; func=C69 family dipeptidase
gene184	965.513	1071.2	919.204	91.164	307.559	633.913	-1.51727	down	0.000926324	0.0051544	Dbxref=GeneID:1061397; Name=pts2CB; func=PTS mannitol transporter subunit IICBA
gene185	797.899	777.443	734.64	97.182	230.702	268.297	-1.95405	down	2.99e-05	0.000289565	Dbxref=GeneID:1061396; Name=mtlR; func=PRD domain-containing protein
gene186	1500.29	1375.1	1536.45	138.92	154.577	374.493	-2.72348	down	2.67e-08	5.51e-07	Dbxref=GeneID:1061394; Name=pts2A; func=mannitol PTS, EIIA
gene187	1478	1508.34	1438.67	133.734	186.115	331.247	-2.76473	down	1.33e-08	2.9e-07	Dbxref=GeneID:1061392; Name=mtlD; func=mannitol-1-phosphate 5-dehydrogenase
gene192	130.658	193.602	146.603	21.206	39.713	42.948	-2.18054	down	3.42e-05	0.000326205	Dbxref=GeneID:1061386; Name=lp_0240; func=MULTISPECIES: hypothetical protein
gene193	341.622	477.421	401.862	12.222	112.806	175.153	-2.02404	down	3.19e-05	0.000306115	Dbxref=GeneID:1061385; Name=ndk; func=nucleoside-diphosphate kinase
gene194	1009.08	921.617	857.976	378.661	446.987	455.854	-1.12174	down	0.0129704	0.0430813	Dbxref=GeneID:1061383; Name=lp_0243; func=MULTISPECIES: DUF2252 domain-containing protein
gene204	165.149	192.672	235.601	790.188	646.814	678.077	1.83358	up	0.0001957	0.00139573	Dbxref=GeneID:1061204; Name=cysE; func=serine acetyltransferase
gene205	349.894	315.07	417.682	1166.62	955.246	1153.16	1.59694	up	0.000951563	0.00524293	Dbxref=GeneID:1061203; Name=cblB; func=aminotransferase class V-fold PLP-dependent enzyme
gene208	2141.63	2001.93	2311.91	286.315	336.75	565.607	-2.44117	down	3.53e-07	5.87e-06	Dbxref=GeneID:1061197; Name=pnuC1; func=MULTISPECIES: nicotinamide mononucleotide transporter
gene209	1120.37	1376.47	1200.43	295.357	506.811	535.413	-1.46684	down	0.00162084	0.00814768	Dbxref=GeneID:1061194; Name=lp_0260; func=MULTISPECIES: DUF2089 family protein
gene210	609.403	850.578	653.831	177.596	332.595	388.359	-1.23417	down	0.0080206	0.0296162	Dbxref=GeneID:1061191; Name=lp_0261; func=hypothetical protein
gene211	1537.3	1679.89	1609.12	369.005	654.103	992.011	-1.26005	down	0.00555097	0.0220625	Dbxref=GeneID:1061190; Name=treR; func=trehalose operon repressor
gene212	1359.01	1354.25	1213.6	223.832	431.437	851.107	-1.38229	down	0.00239205	0.0111054	Dbxref=GeneID:1061188; Name=treA; func=alpha,alpha-phosphotrehalase
gene215	8498	8026.72	7666.29	894.558	2031.61	4087.86	-1.78616	down	0.000113315	0.000889424	Dbxref=GeneID:1061184; Name=lp_0266; func=hypothetical protein LP80_2932
gene216	1806.17	1902.77	2076.29	3823.8	3505.44	5715.17	1.17299	up	0.0149772	0.0483192	Dbxref=GeneID:1061183; Name=tagD1; func=MULTISPECIES: glycerol-3-phosphate cytidylyltransferase
gene218	578.758	710.323	705.971	1631.37	1351.41	2332.62	1.41375	up	0.00328602	0.0145189	Dbxref=GeneID:1061181; Name=tagF2; func=glycosyltransferase
gene221	522.89	509.19	573.668	251.292	268.92	125.109	-1.31515	down	0.00479552	0.0198752	Dbxref=GeneID:1061174; Name=lp_0273; func=MULTISPECIES: Rrf2 family transcriptional regulator
gene227	11.887	9.107	3.078	19.268	26.86	23.307	1.52819	up	0.0086493	0.0313607	Dbxref=GeneID:1061165; Name=lp_0280; func=MULTISPECIES: MFS transporter
gene230	305.279	282.319	220.202	110.84	79.257	94.763	-1.50374	down	0.00146042	0.00746142	Dbxref=GeneID:1061162; Name=rrp2; func=DNA-binding response regulator
gene233	2253.97	2386.24	2221.19	264.653	417.087	713.858	-2.29762	down	1.28e-06	1.86e-05	Dbxref=GeneID:1061159; Name=pts6C; func=PTS cellobiose transporter subunit IIC
gene237	2216.87	2059.68	2097.93	222.027	277.111	322.055	-2.95651	down	1.55e-09	4.15e-08	Dbxref=GeneID:1061153; Name=glcD; func=putative glycolate oxidase, subunit GlcD
gene241	194.61	220.052	199.237	480.807	482.997	555.274	1.30712	up	0.00665205	0.0253626	Dbxref=GeneID:1061148; Name=lp_0295; func=transporter
gene248	197.58	188.841	214.542	9828.75	9620.43	2951.73	5.22013	up	4.75e-21	5.8e-19	Dbxref=GeneID:1061136; Name=lp_0302; func=LysM domain-containing protein
gene249	234.564	241.596	337.425	6788.12	6203.08	4274.85	4.4075	up	1.61e-16	1.11e-14	Dbxref=GeneID:1061134; Name=lp_0304; func=MULTISPECIES: LysM domain-containing protein
gene250	150.313	176.92	210.823	716.068	553.438	562.49	1.76758	up	0.000407632	0.00264537	Dbxref=GeneID:1061133; Name=gcsH1; func=hypothetical protein HMPREF0531_10357
gene251	79.544	76.441	79.857	382.277	432.28	355.293	2.31042	up	4.2e-06	5.25e-05	Dbxref=GeneID:1061132; Name=lp_0306; func=hypothetical protein
gene252	89.336	92.531	86.206	358.66	400.784	335.02	2.02951	up	5.28e-05	0.000469579	Dbxref=GeneID:1061130; Name=lp_0307; func=MULTISPECIES: hypothetical protein
gene255	703.15	662.982	659.272	218.397	233.4	430.513	-1.19885	down	0.00828972	0.0303551	Dbxref=GeneID:1061294; Name=ack2; func=acetate kinase
gene256	294.302	339.082	297.846	1507.17	1602.62	272.197	1.86066	up	0.000150298	0.0011173	Dbxref=GeneID:1062139; Name=lp_0311; func=GNAT family N-acetyltransferase
gene258	3171.29	3241.11	3171.19	884.585	796.237	1049.54	-1.81147	down	9.74e-05	0.00077776	Dbxref=GeneID:1062140; Name=ndh1; func=MULTISPECIES: NAD(P)/FAD-dependent oxidoreductase
gene263	634.707	551.946	583.874	266.556	278.331	273.804	-1.11279	down	0.014261	0.0465427	Dbxref=GeneID:1064060; Name=potA; func=spermidine/putrescine ABC transporter ATP-binding protein
gene264	252.441	286.659	262.073	57.563	84.002	80.18	-1.8532	down	0.000152089	0.00112167	Dbxref=GeneID:1062146; Name=lp_0319; func=XRE family transcriptional regulator
gene265	6279.49	6016.75	5869.5	2122.05	2361.06	2255.17	-1.43077	down	0.00175995	0.00875302	Dbxref=GeneID:1062147; Name=lp_0320; func=MULTISPECIES: ASCH domain-containing protein
gene272	2665.17	2208.52	2419.88	698.96	721.872	586.586	-1.86128	down	6.53e-05	0.000561259	Dbxref=GeneID:1062166; Name=acdH; func=aldehyde dehydrogenase family protein
gene273	25812.9	25826	26795.4	99363.4	98334.6	83395.2	1.84149	up	0.000136501	0.001048	Dbxref=GeneID:1062165; Name=fba; func=MULTISPECIES: class II fructose-1,6-bisphosphate aldolase
gene275	303.601	358.882	308.816	822.882	718.544	663.785	1.18293	up	0.0146781	0.0475177	Dbxref=GeneID:1062168; Name=lp_0332; func=MULTISPECIES: SPFH/Band 7/PHB domain protein
gene279	526.969	522.563	502.081	78.092	74.809	50.576	-2.93081	down	6.43e-09	1.49e-07	Dbxref=GeneID:1062171; Name=lp_0336; func=BioY family protein
gene280	684.034	689.126	757.164	133.014	132.569	132.832	-2.41872	down	5.54e-07	8.85e-06	Dbxref=GeneID:1062138; Name=birA1; func=biotin--[acetyl-CoA-carboxylase] ligase
gene281	431.094	518.448	497.396	135.311	123.083	141.79	-1.85426	down	0.00014557	0.00109928	Dbxref=GeneID:1062136; Name=lp_0338; func=hypothetical protein
gene282	450.993	506.658	596.484	201.759	216.235	212.239	-1.30215	down	0.00458531	0.0190885	Dbxref=GeneID:1062135; Name=dapC; func=pyridoxal phosphate-dependent aminotransferase
gene298	454.226	633.87	524.921	184.006	263.897	244.64	-1.21978	down	0.00845219	0.030805	Dbxref=GeneID:1062196; Name=lp_0360; func=transcription regulator (putative)
gene299	654.587	775.033	608.386	249.258	340.097	313.596	-1.17444	down	0.0106793	0.0371396	Dbxref=GeneID:1062195; Name=lp_0361; func=hypothetical protein
gene301	1299.16	1691.46	1538.88	632.481	547.257	729.871	-1.24607	down	0.00615159	0.0239232	Dbxref=GeneID:1064065; Name=lp_0363; func=ribonucleoside hydrolase RihC
gene302	540.901	589.734	587.749	249.424	255.94	215.188	-1.25387	down	0.00625544	0.0242118	Dbxref=GeneID:1062173; Name=lp_0364; func=oxidoreductase
gene376	88.69	140.673	95.829	258.653	269	377.252	1.47647	up	0.00373523	0.016	Dbxref=GeneID:1061378; Name=lp_0452; func=phosphohydrolase
gene377	953.943	1024.05	1047.95	2572.89	2235.64	2365	1.2453	up	0.00951421	0.0338846	Dbxref=GeneID:1064149; Name=metS; func=methionine--tRNA ligase
gene378	36.757	38.761	35.178	251.782	284.841	279.357	2.8819	up	2.52e-08	5.24e-07	Dbxref=GeneID:1061384; Name=lp_0455; func=Bcr/CflA family efflux MFS transporter
gene382	11616.2	11705.6	12337.9	25427.3	33458.6	27227.6	1.27195	up	0.00809701	0.0298199	Dbxref=GeneID:1061391; Name=lp_0459; func=MULTISPECIES: Veg protein
gene387	1007.11	884.113	975.46	392.112	326.975	295.06	-1.49911	down	0.00118321	0.00634506	Dbxref=GeneID:1061400; Name=purR; func=MULTISPECIES: pur operon repressor
gene391	1436.36	1248.43	1298.32	219.435	282.016	341.573	-2.24025	down	2.46e-06	3.23e-05	Dbxref=GeneID:1064142; Name=lp_0472; func=MULTISPECIES: YdcF family protein
gene392	2464.82	2480.64	2328.72	870.887	1183.07	1321.44	-1.10772	down	0.0138505	0.0455202	Dbxref=GeneID:1061407; Name=lp_0473; func=lipoprotein precursor
gene396	3465.6	2942.3	3428.97	1440.1	1468.72	1530.25	-1.14794	down	0.011166	0.0384517	Dbxref=GeneID:1061433; Name=lp_0479; func=MULTISPECIES: DUF1934 domain-containing protein
gene417	91.006	118.523	100.99	316.096	356.964	261.645	1.58982	up	0.00118882	0.00636303	Dbxref=GeneID:1061487; Name=sdaC; func=serine transporter
gene418	223.308	216.546	197.811	586.556	603.291	545.2	1.4441	up	0.00316398	0.0140455	Dbxref=GeneID:1061489; Name=sdhB; func=L-serine dehydratase, iron-sulfur-dependent, beta subunit
gene419	195.009	160.192	172.492	459.382	430.789	422.452	1.31468	up	0.00722825	0.0270819	Dbxref=GeneID:1061492; Name=sdhA; func=L-serine dehydratase, iron-sulfur-dependent, alpha subunit
gene421	0	26.172	14.743	102.004	116.956	59.667	2.76754	up	0.000166089	0.00120597	Dbxref=GeneID:1061499; Name=lp_0509; func=hypothetical protein HMPREF0531_13011
gene422	899.057	846.594	906.669	2654.1	2404.39	2134.76	1.43939	up	0.00276647	0.012478	Dbxref=GeneID:1061497; Name=murA1; func=MULTISPECIES: UDP-N-acetylglucosamine 1-carboxyvinyltransferase
gene423	515.207	501.269	600.318	1820.74	1650.96	1928.02	1.73974	up	0.000318594	0.00212648	Dbxref=GeneID:1061500; Name=rho; func=MULTISPECIES: transcription termination factor Rho
gene424	8535.33	8350.19	9395.88	48554.5	51708.6	21538.6	2.21242	up	5.56e-06	6.85e-05	Dbxref=GeneID:1061502; Name=rpmE; func=MULTISPECIES: type B 50S ribosomal protein L31
gene425	869.828	726.021	920.359	2592.87	2466.19	2172.08	1.52297	up	0.00155913	0.00787975	Dbxref=GeneID:1061504; Name=lp_0513; func=MULTISPECIES: hypothetical protein
gene432	367.031	369.052	360.347	1495.13	1570.7	1387.57	2.02209	up	4.07e-05	0.000377231	Dbxref=GeneID:1061816; Name=acpS; func=MULTISPECIES: holo-ACP synthase
gene433	387.277	475.057	451.108	1593.33	1426.42	1221.81	1.69124	up	0.000466931	0.00297523	Dbxref=GeneID:1061815; Name=alr; func=MULTISPECIES: alanine racemase
gene434	391.17	360.359	435.252	1001.41	1131.62	731.554	1.27127	up	0.00923683	0.0330596	Dbxref=GeneID:1061813; Name=lp_0524; func=type II toxin-antitoxin system PemK/MazF family toxin
gene435	47.806	54.046	52.916	228.555	273.724	183.973	2.14861	up	1.49e-05	0.00015862	Dbxref=GeneID:1061850; Name=kup1; func=potassium transporter Kup
gene439	2.119	1.055	4.756	14.102	17.921	9.003	2.37071	up	0.00127437	0.00670598	Dbxref=GeneID:1061854; Name=argJ; func=glutamate N-acetyltransferase
gene449	380.732	387.132	367.194	1110.06	963.415	835.074	1.35753	up	0.00484189	0.0199497	Dbxref=GeneID:1061893; Name=lp_0540; func=MULTISPECIES: sugar transporter
gene450	458.164	425.289	419.25	1312.24	1211.6	1137.71	1.49094	up	0.00236564	0.011024	Dbxref=GeneID:1061892; Name=lp_0541; func=MULTISPECIES: RNA-binding S4 domain-containing protein
gene455	13914.4	14090.4	13594.6	4901.59	4842.56	5654.73	1.43374	up	0.00168833	0.00844164	Dbxref=GeneID:1061904; Name=ftsH; func=ATP-dependent metallopeptidase HflB
gene460	546.595	646.439	555.806	1989.08	2812.8	745.65	1.66545	up	0.00106558	0.00582545	Dbxref=GeneID:1061913; Name=lp_tRNA02; func=_
gene489	801.612	623.757	749.817	33.234	32.009	30.29	-4.50895	down	9.21e-17	6.47e-15	Dbxref=GeneID:1061524; Name=lp_0574; func=hypothetical protein HMPREF0531_12180
gene490	17029.8	16108.6	16764.1	1758.84	3051.39	5264.59	-2.30836	down	1.11e-06	1.61e-05	Dbxref=GeneID:1061523; Name=pts9AB; func=MULTISPECIES: PTS mannose transporter subunit IIAB
gene500	2332.92	2142.11	2409.33	752.758	816.633	1320.49	-1.25231	down	0.00566297	0.0224126	Dbxref=GeneID:1061540; Name=manR; func=transcription regulator
gene508	458.142	553.517	565.822	1844.38	1737.23	1755.3	1.75838	up	0.00027583	0.00188584	Dbxref=GeneID:1061550; Name=lp_0593; func=LytR family transcriptional regulator
gene509	81.148	94.067	129.861	308.35	265.247	351.163	1.5999	up	0.00115894	0.00622682	Dbxref=GeneID:1061554; Name=mleP1; func=auxin efflux carrier
gene510	474.474	504.875	529.579	1161.82	1065.86	1999.55	1.48619	up	0.00209428	0.0101289	Dbxref=GeneID:1061553; Name=lp_0595; func=MULTISPECIES: EamA family transporter
gene517	645.182	601.876	596.846	2084.82	2017.88	1647.9	1.64095	up	0.000671302	0.00397128	Dbxref=GeneID:1061574; Name=radA; func=DNA repair protein RadA
gene518	773.442	796.332	933.84	2305.12	2538.58	2232.81	1.49903	up	0.00183915	0.00906667	Dbxref=GeneID:1061588; Name=lp_0607; func=PIN/TRAM domain-containing protein
gene531	3174.74	3812.41	3736.18	18117.6	15365	7598.14	1.93771	up	6.14e-05	0.000532317	Dbxref=GeneID:1061633; Name=rplJ; func=ribosomal protein L10
gene532	1610.9	2046.92	1904.89	8959.7	7549.63	4406.28	1.91072	up	7.96e-05	0.000658109	Dbxref=GeneID:1061624; Name=rplL; func=ribosomal protein L7/L12
gene549	89.9	179.069	92.466	0	6.669	19.754	-3.77372	down	7.82e-07	1.22e-05	Dbxref=GeneID:11933289; Name=lp_0639; func=MULTISPECIES: hypothetical protein
gene550	357.511	438.476	330.572	14.685	20.626	33.944	-4.0238	down	8.81e-13	3.7e-11	Dbxref=GeneID:1061781; Name=lp_0640; func=hypothetical protein AZF39_00644
gene551	734.313	820.405	828.788	25.599	25.683	60.441	-4.41505	down	2.05e-16	1.37e-14	Dbxref=GeneID:1061771; Name=lp_0641; func=DNA recombination protein RecT
gene552	610.039	740.922	742.922	23.102	22.515	41.412	-4.58849	down	4.33e-17	3.12e-15	Dbxref=GeneID:1061800; Name=lp_0642; func=hypothetical protein
gene553	328.165	356.915	403.651	1.523	7.333	18.103	-5.33558	down	1.47e-19	1.42e-17	Dbxref=GeneID:1061799; Name=lp_0643; func=DUF4373 domain-containing protein
gene554	120.101	208.214	154.723	0	3.959	5.213	-5.71829	down	3.69e-13	1.7e-11	Dbxref=GeneID:1061802; Name=lp_0644; func=hypothetical protein
gene555	803.39	1098.06	936.63	16.054	12.885	68.563	-4.8633	down	2.81e-18	2.33e-16	Dbxref=GeneID:1062096; Name=lp_0645; func=MULTISPECIES: hypothetical protein
gene556	107.956	109.906	99.597	0	0	7.731	-5.35923	down	8.95e-14	4.49e-12	Dbxref=GeneID:1062095; Name=lp_0646; func=hypothetical protein
gene566	41.594	46.947	59.115	0	0	7.312	-4.33527	down	7.48e-08	1.4e-06	Dbxref=GeneID:1062056; Name=lp_0656; func=transcriptional regulator
gene591	5.575	11.104	7.506	0	0	0	-12.977	down	7.03e-06	8.44e-05	Dbxref=GeneID:1061933; Name=lp_0681; func=LysM peptidoglycan-binding domain-containing protein
gene599	175.632	224.894	186.579	644.366	587.241	608.537	1.64812	up	0.000650447	0.00388884	Dbxref=GeneID:1062390; Name=lp_0690; func=bifunctional lysylphosphatidylglycerol flippase/synthetase MprF
gene620	5.993	0	3.362	11.632	14.671	10.097	1.95979	up	0.01381	0.0454403	Dbxref=GeneID:1062991; Name=phnE1; func=MULTISPECIES: ABC transporter permease subunit
gene628	1233.28	1310.61	1383.06	454.961	464.066	580.12	-1.38927	down	0.00235437	0.0110079	Dbxref=GeneID:1063352; Name=lp_0723; func=ABC transporter ATP-binding protein
gene629	2206.94	2611.95	2391.47	502.927	464.203	699.172	-2.11342	down	7.56e-06	8.96e-05	Dbxref=GeneID:1063358; Name=lp_0725; func=MULTISPECIES: transcriptional regulator
gene631	6809.72	9230.63	16983.2	52794	62213.1	51298.6	2.33227	up	8.82e-07	1.33e-05	Dbxref=GeneID:1063373; Name=groES; func=MULTISPECIES: co-chaperone GroES
gene632	6445.89	8007.52	18042.9	42475	49969.1	39952.8	2.02652	up	1.46e-05	0.000157122	Dbxref=GeneID:1063384; Name=groEL; func=MULTISPECIES: chaperonin GroEL
gene635	49.654	96.079	81.184	26.748	37.885	29.095	-1.27559	down	0.00965733	0.0343508	Dbxref=GeneID:1063421; Name=pstF; func=MULTISPECIES: phosphate ABC transporter substrate-binding protein
gene652	5095.58	5430.61	5040.22	2140.26	2602.28	2301.28	-1.144	down	0.0113796	0.038996	Dbxref=GeneID:1063590; Name=lp_0752; func=PspC domain-containing protein
gene659	198.554	196.843	211.596	66.363	66.176	142.109	-1.14409	down	0.0130921	0.0432809	Dbxref=GeneID:1063681; Name=nox1; func=NADH oxidase
gene680	46944.8	47740.3	47046	12106.6	11708.1	12376.3	-1.96945	down	2.53e-05	0.000252791	Dbxref=GeneID:1063787; Name=clpP; func=MULTISPECIES: ATP-dependent Clp protease proteolytic subunit
gene682	609.902	571.184	601.615	112.557	149.998	215.995	-1.89732	down	5.37e-05	0.000476062	Dbxref=GeneID:1063796; Name=rpoN; func=MULTISPECIES: RNA polymerase factor sigma-54
gene690	173.943	148.605	163.723	405.02	372.037	402.619	1.27855	up	0.00849381	0.0309133	Dbxref=GeneID:1063830; Name=eriC; func=MULTISPECIES: ClC family H(+)/Cl(-) exchange transporter
gene695	1189.09	1040.57	1093.74	40.277	75.844	146.623	-3.66092	down	4.37e-13	1.95e-11	Dbxref=GeneID:1063868; Name=lp_0800; func=BspA family leucine-rich repeat surface protein
gene696	333.42	451.925	392.117	116.667	115.064	272.68	-1.223	down	0.00743915	0.0278349	Dbxref=GeneID:1063874; Name=lp_0802; func=ABC transporter, permease protein
gene697	493.26	614.499	555.415	156.575	148.94	409.541	-1.21781	down	0.00795289	0.0294824	Dbxref=GeneID:1063875; Name=glnQ1; func=amino acid ABC transporter ATP-binding protein
gene703	665.368	652.769	710.357	250.562	293.921	272.767	-1.31156	down	0.00457154	0.0190877	Dbxref=GeneID:1063904; Name=lp_0810; func=MULTISPECIES: GNAT family N-acetyltransferase
gene704	2190	2024.28	2149.45	891.619	1095.73	622.051	-1.28615	down	0.00482169	0.0199249	Dbxref=GeneID:1063906; Name=lp_0811; func=Exonuclease
gene707	684.934	704.604	676.809	1472.35	1500.36	1799.01	1.20743	up	0.0123391	0.0412815	Dbxref=GeneID:1063918; Name=murB; func=MULTISPECIES: UDP-N-acetylenolpyruvoylglucosamine reductase
gene708	173.217	192.279	197.056	544.962	440.604	602.638	1.49733	up	0.00194424	0.00953459	Dbxref=GeneID:1063926; Name=nhaP1; func=sodium:proton antiporter
gene720	1936.66	1563.39	1643.26	450.244	604.961	396.472	-1.82497	down	9.96e-05	0.000792627	Dbxref=GeneID:1063955; Name=lp_0828; func=MULTISPECIES: hypothetical protein
gene721	2077.29	1675.74	1962.39	575.477	681.469	514.393	-1.69002	down	0.000268775	0.00185567	Dbxref=GeneID:1063957; Name=lp_0829; func=NADPH-dependent oxidoreductase
gene725	160.135	177.204	199.643	19.733	63.351	72.98	-1.78272	down	0.00873281	0.031582	Dbxref=GeneID:1061108; Name=lp_tRNA13; func=_
gene728	172.309	223.836	179.328	1899.9	1527.1	992.093	2.94092	up	6.65e-09	1.53e-07	Dbxref=GeneID:1061866; Name=lp_0838; func=VanZ family protein
gene734	213.513	196.494	260.799	89.922	122.693	85.518	-1.16993	down	0.0142171	0.0464536	Dbxref=GeneID:1061992; Name=lp_0845; func=MarR family transcriptional regulator
gene736	5239.9	4338.73	4716.7	379.089	396.673	381.353	-3.62694	down	7.01e-13	3.03e-11	Dbxref=GeneID:1062613; Name=lp_0848; func=putative permease
gene737	401.994	384.96	403.967	64.506	62.914	104.617	-2.35964	down	9.51e-07	1.42e-05	Dbxref=GeneID:1061989; Name=pox1; func=pyruvate oxidase
gene738	159.947	157.793	177.774	25.102	36.265	45.092	-2.2186	down	9.38e-06	0.000107163	Dbxref=GeneID:1062600; Name=ribC1; func=MULTISPECIES: riboflavin biosynthesis protein RibC
gene746	241.004	237.286	284.813	582.332	533.457	660.716	1.21909	up	0.0116805	0.0397363	Dbxref=GeneID:1061828; Name=bcaP; func=amino acid permease
gene747	72.973	53.834	54.586	26.977	31.275	14.253	-1.32293	down	0.0141406	0.0462574	Dbxref=GeneID:1061851; Name=lp_0862; func=MULTISPECIES: alcohol dehydrogenase
gene748	298.762	316.241	308.898	163.068	112.779	106.32	-1.27353	down	0.00617234	0.0239496	Dbxref=GeneID:1064132; Name=pdxK; func=MULTISPECIES: pyridoxine kinase
gene752	8341.45	6589.11	7293.98	2239.95	2676.17	3639.15	-1.37727	down	0.00249906	0.0114371	Dbxref=GeneID:1062976; Name=lp_0868; func=MULTISPECIES: transcriptional repressor
gene757	3350.13	4252.89	3325.48	281.899	502.286	682.142	-2.89781	down	3.9e-09	9.96e-08	Dbxref=GeneID:1061868; Name=lp_0875; func=hypothetical protein
gene769	46.479	46.29	55.411	315.726	403.38	170.216	2.58533	up	1.32e-06	1.89e-05	Dbxref=GeneID:1061206; Name=lp_0892; func=transcriptional regulator, MarR family
gene770	86.29	69.412	84.409	262.56	358.444	194.794	1.7645	up	0.000367424	0.00241394	Dbxref=GeneID:1062627; Name=lp_0893; func=MFS transporter
gene777	319.325	340.608	438.861	1198.64	835.902	1024.12	1.47698	up	0.00230374	0.0108139	Dbxref=GeneID:1061860; Name=pgm3; func=MULTISPECIES: histidine phosphatase family protein
gene781	10.638	13.621	13.641	0	2.705	6.678	-2.01373	down	0.00617918	0.0239496	Dbxref=GeneID:1061975; Name=bglG2; func=PRD domain-containing protein
gene791	34.718	27.661	23.373	7.701	3.09	13.223	-1.83616	down	0.0110351	0.0382352	Dbxref=GeneID:1061925; Name=lp_0917; func=MULTISPECIES: XRE family transcriptional regulator
gene806	511.663	471.266	556.842	153.597	113.005	260.362	-1.54693	down	0.00119212	0.00636852	Dbxref=GeneID:1064029; Name=lp_0934; func=PTS lactose/cellobiose transporter subunit IIA
gene807	467.27	500.995	506.738	141.333	107.465	273.799	-1.49694	down	0.00140467	0.00722917	Dbxref=GeneID:1064027; Name=lp_0935; func=hypothetical protein
gene816	119.496	115.436	139.717	42.583	46.316	45.313	-1.48101	down	0.00143472	0.00737034	Dbxref=GeneID:1063978; Name=lp_0946; func=LPXTG cell wall anchor domain-containing protein
gene822	203.346	209.269	212.952	32.324	47.664	69.505	-2.06506	down	1.57e-05	0.000165565	Dbxref=GeneID:1063965; Name=lp_0952; func=FAD-binding protein
gene825	373.649	417.413	397.068	133.745	103.826	200.117	-1.44071	down	0.00184408	0.00907509	Dbxref=GeneID:1063894; Name=asnS1; func=Asparagine--tRNA ligase 1
gene826	407.196	454.256	467.276	118.764	91.791	201.027	-1.69079	down	0.000311916	0.00210188	Dbxref=GeneID:1063901; Name=asnA; func=aspartate--ammonia ligase
gene828	324.166	296.978	312.434	3377.35	3487.56	930.86	3.06185	up	1.12e-09	3.11e-08	Dbxref=GeneID:1063860; Name=lp_0960; func=hypothetical protein
gene829	302.278	320.161	279.949	1835.83	1806.58	492.002	2.19586	up	1.15e-05	0.000126551	Dbxref=GeneID:11933292; Name=lp_0960a; func=MULTISPECIES: hypothetical protein
gene837	373.439	421.953	345.735	1129.19	1044.92	1143.64	1.53975	up	0.00151111	0.00770641	Dbxref=GeneID:1063789; Name=lp_0969; func=MULTISPECIES: YibE/F family protein
gene841	17.635	12.545	12.721	2.794	4.485	5.167	-1.78508	down	0.00543482	0.0217548	Dbxref=GeneID:1063734; Name=lp_0973; func=hydrolase, alpha/beta domain protein
gene842	9.144	12.75	8.208	3.042	3.256	3.483	-1.62151	down	0.0102339	0.0360368	Dbxref=GeneID:1063736; Name=xylP2; func=MFS transporter
gene848	456.275	559.284	531.652	1128.83	1483.98	1362.49	1.36139	up	0.00557742	0.0221051	Dbxref=GeneID:1063651; Name=lp_0984; func=MULTISPECIES: MerR family transcriptional regulator
gene853	1327.92	1251.17	1245.77	430.814	598.364	472.186	-1.34913	down	0.00333969	0.0146863	Dbxref=GeneID:1063642; Name=lp_0992; func=MULTISPECIES: MerR family transcriptional regulator
gene854	10857.6	10232.8	10382.8	3129.81	3857.27	4163.41	-1.49702	down	0.00109041	0.00593809	Dbxref=GeneID:1063636; Name=lp_0995; func=hypothetical protein HMPREF0531_11187
gene860	83.087	128.934	69.378	280.725	306.151	314.188	1.679	up	0.000785818	0.00449725	Dbxref=GeneID:1063612; Name=lp_1001; func=MULTISPECIES: phosphatase PAP2 family protein
gene865	220.572	195.949	211.853	1541.12	1448.18	927.461	2.63996	up	1.07e-07	1.97e-06	Dbxref=GeneID:1063549; Name=lysP; func=MULTISPECIES: amino acid permease
gene869	2374.69	2365.02	2156.14	7207.8	10541.1	2334.35	1.54219	up	0.001548	0.00785177	Dbxref=GeneID:1063399; Name=lp_tRNA14; func=_
gene870	807.256	943.792	846.705	2374.44	3374.11	555.279	1.27896	up	0.0110876	0.0383698	Dbxref=GeneID:1063263; Name=lp_tRNA15; func=_
gene879	2423.61	2537.58	2695.48	7095.18	5621.3	4916.1	1.20345	up	0.012041	0.0405887	Dbxref=GeneID:1062809; Name=rpoB; func=DNA-directed RNA polymerase subunit beta
gene880	2730.65	2918.17	3066.67	9277.91	6870.76	6313.47	1.36584	up	0.00437675	0.0184112	Dbxref=GeneID:1062844; Name=rpoC; func=MULTISPECIES: DNA-directed RNA polymerase subunit beta'
gene882	4409.52	4092.64	4308.82	13366.9	11240.7	11365.9	1.48956	up	0.00195255	0.00955864	Dbxref=GeneID:1062769; Name=rpsL; func=MULTISPECIES: 30S ribosomal protein S12
gene883	8823.41	7871.91	9103.72	26331	20729.2	17857.1	1.33129	up	0.00550606	0.0219461	Dbxref=GeneID:1062792; Name=rpsG; func=MULTISPECIES: 30S ribosomal protein S7
gene887	4370.87	4483.94	4846.72	13296.9	9760.38	8925.45	1.22296	up	0.010764	0.037388	Dbxref=GeneID:1062816; Name=rplD; func=MULTISPECIES: 50S ribosomal protein L4
gene888	5952.23	5975.74	6600.44	18784.1	14071.8	14377.3	1.35006	up	0.00491785	0.020086	Dbxref=GeneID:1062656; Name=rplW; func=MULTISPECIES: 50S ribosomal protein L23
gene889	4503.61	4722.23	4866.73	16668.7	12094.2	11582.9	1.51748	up	0.00157722	0.00795689	Dbxref=GeneID:1062631; Name=rplB; func=MULTISPECIES: 50S ribosomal protein L2
gene890	3690.07	4456.29	3984.18	16513.9	12188.3	14469.1	1.83143	up	0.000152117	0.00112167	Dbxref=GeneID:1062768; Name=rpsS; func=MULTISPECIES: 30S ribosomal protein S19
gene891	4999.16	4780.84	5411.01	19270.2	13782.2	13028.6	1.60095	up	0.000873552	0.00490936	Dbxref=GeneID:1061107; Name=rplV; func=MULTISPECIES: 50S ribosomal protein L22
gene892	3179.2	3375	3389.17	14409.7	9715.43	10376	1.79484	up	0.000199483	0.00141552	Dbxref=GeneID:1063523; Name=rpsC; func=MULTISPECIES: 30S ribosomal protein S3
gene893	2806.6	3050.35	3175.56	12535.4	9046.58	8558.32	1.7385	up	0.00031178	0.00210188	Dbxref=GeneID:1063522; Name=rplP; func=MULTISPECIES: 50S ribosomal protein L16
gene894	5617.05	5914.79	6486.86	19169.5	13724.8	14922.6	1.40803	up	0.00338586	0.0148197	Dbxref=GeneID:1063521; Name=rpmC; func=MULTISPECIES: 50S ribosomal protein L29
gene895	3141.02	3312.53	3700.05	12560.6	8459.52	9871.11	1.60521	up	0.000859971	0.00484272	Dbxref=GeneID:1063517; Name=rpsQ; func=MULTISPECIES: 30S ribosomal protein S17
gene896	3166.25	3416.14	3264.41	11512.5	7660.88	7362.11	1.43019	up	0.00291829	0.0130997	Dbxref=GeneID:1063512; Name=rplN; func=MULTISPECIES: 50S ribosomal protein L14
gene897	4204.57	4228.35	3943.72	14112.1	9999.77	10446.6	1.48142	up	0.00207305	0.0100609	Dbxref=GeneID:1063510; Name=rplX; func=MULTISPECIES: 50S ribosomal protein L24
gene898	3003.34	3277.78	3076.05	10547.2	7547.56	7599.17	1.45728	up	0.00242351	0.0112192	Dbxref=GeneID:1063508; Name=rplE; func=MULTISPECIES: 50S ribosomal protein L5
gene899	6343.42	6797.76	6893.48	21212.2	14959.1	17711	1.42731	up	0.0029874	0.0133248	Dbxref=GeneID:1063505; Name=rpsN; func=MULTISPECIES: type Z 30S ribosomal protein S14
gene900	3451.8	3341.1	3252.36	9855.69	7184.62	7643.03	1.29702	up	0.00696991	0.026254	Dbxref=GeneID:1063499; Name=rpsH; func=MULTISPECIES: 30S ribosomal protein S8
gene901	3626.15	3680.29	3589.56	12353	8511.03	8946.35	1.45202	up	0.00250992	0.0114681	Dbxref=GeneID:1063498; Name=rplF; func=MULTISPECIES: 50S ribosomal protein L6
gene902	4995.14	5031.99	5395.39	15620.5	11329.8	12342.7	1.34923	up	0.00495318	0.0201134	Dbxref=GeneID:1063497; Name=rplR; func=ribosomal protein L18
gene903	3431.56	3858.16	4048.33	12818.1	8958.72	7473.58	1.36728	up	0.00435681	0.0183583	Dbxref=GeneID:1063488; Name=rpsE; func=MULTISPECIES: 30S ribosomal protein S5
gene904	4445.28	5012.83	4587.21	13943.7	9963.82	10179	1.27911	up	0.00782784	0.0291341	Dbxref=GeneID:1063487; Name=rpmD; func=MULTISPECIES: 50S ribosomal protein L30
gene905	2087.69	2312.51	2069.63	7587.3	5535.33	4907.93	1.47864	up	0.00211837	0.0101928	Dbxref=GeneID:1063485; Name=rplO; func=MULTISPECIES: 50S ribosomal protein L15
gene906	3397.43	3701.59	3607.99	11462.6	8129.22	7738.23	1.35193	up	0.00481518	0.0199249	Dbxref=GeneID:1063478; Name=secY; func=MULTISPECIES: preprotein translocase subunit SecY
gene907	1319.9	1391.86	1400.4	4882.28	3301.76	3192.56	1.4681	up	0.00227129	0.0107628	Dbxref=GeneID:1063477; Name=adk; func=MULTISPECIES: adenylate kinase
gene908	2334.02	2435.22	2481.04	8641.39	6029.66	5419.11	1.47038	up	0.00228097	0.0107768	Dbxref=GeneID:1063476; Name=infA; func=translation initiation factor IF-1
gene909	4099.46	4529.33	4084.7	13722.3	10348.4	13274.1	1.55455	up	0.00128776	0.00676373	Dbxref=GeneID:1063474; Name=rpmJ; func=MULTISPECIES: 50S ribosomal protein L36
gene910	3031.19	3304.7	3397.2	11106.1	8714.45	9981.04	1.61442	up	0.000803847	0.00456325	Dbxref=GeneID:1063467; Name=rpsM; func=30S ribosomal protein S13
gene911	2982.62	3160.22	3103.37	12572	8976.4	8030.08	1.67761	up	0.000498852	0.00312199	Dbxref=GeneID:1063464; Name=rpsK; func=MULTISPECIES: 30S ribosomal protein S11
gene912	2895.65	3345.61	3212.54	12881.6	9453.23	10238.7	1.78474	up	0.000215641	0.00151868	Dbxref=GeneID:1063463; Name=rpoA; func=MULTISPECIES: DNA-directed RNA polymerase subunit alpha
gene913	3166.01	3488.7	3582.34	15517.5	11317.1	9222.88	1.8165	up	0.000168132	0.00121766	Dbxref=GeneID:1063456; Name=rplQ; func=MULTISPECIES: 50S ribosomal protein L17
gene914	10.143	12.122	12.519	23.623	40.629	30.014	1.43824	up	0.0111437	0.0384217	Dbxref=GeneID:1063455; Name=ISP1_1; func=ISL3-like element ISP1 family transposase
gene919	3776.91	3531.69	3777.32	1092.78	1247.35	1677.03	-1.46448	down	0.00137392	0.00712963	Dbxref=GeneID:1063433; Name=lp_1070; func=FMN-binding protein
gene925	8052.92	7985.66	8864.15	50152.5	45281.7	40739.9	2.45108	up	5.91e-07	9.38e-06	Dbxref=GeneID:1063414; Name=rplM; func=ribosomal protein L13
gene926	4909.18	4788.56	5376.64	29597.5	24962.4	17477.1	2.25664	up	3.73e-06	4.76e-05	Dbxref=GeneID:1063406; Name=rpsI; func=MULTISPECIES: 30S ribosomal protein S9
gene929	48.232	42.177	47.518	16.961	8.377	20.335	-1.59443	down	0.00222098	0.010576	Dbxref=GeneID:1063397; Name=lp_1082; func=MULTISPECIES: Ldh family oxidoreductase
gene939	34.952	40.864	56.269	107.864	114.979	123.773	1.39185	up	0.00676468	0.0256875	Dbxref=GeneID:1063360; Name=citG; func=MULTISPECIES: triphosphoribosyl-dephospho-CoA synthase
gene940	24.302	36.305	29.216	8147.28	8376.29	4721.6	7.88579	up	1.96e-35	5.51e-32	Dbxref=GeneID:1063356; Name=mtsC; func=MtsC
gene941	48.426	29.229	31.284	4239.52	4185.11	2923.08	6.7027	up	7.08e-29	4.98e-26	Dbxref=GeneID:1063353; Name=mtsB; func=MtsB
gene942	76.158	74.493	76.297	6441.72	6517.53	5668.95	6.35896	up	2.31e-27	1.08e-24	Dbxref=GeneID:1063345; Name=mtsA; func=MULTISPECIES: manganese ABC transporter substrate-binding protein
gene943	776.039	727.898	686.465	200.365	285.081	348.862	-1.39254	down	0.00295616	0.0132274	Dbxref=GeneID:1063344; Name=lp_1098; func=MULTISPECIES: hypothetical protein
gene957	70.132	76.831	73.445	1880.53	2762.03	907.497	4.65423	up	8.44e-18	6.41e-16	Dbxref=GeneID:1063292; Name=mleS; func=NAD-dependent malic enzyme
gene958	9.226	34.128	28.098	260.182	551.392	358.337	4.03322	up	1.88e-13	8.96e-12	Dbxref=GeneID:1063291; Name=mleP2; func=MULTISPECIES: malate permease
gene962	69.593	69.31	79.68	31.503	32.027	28.85	-1.2425	down	0.00779378	0.0290458	Dbxref=GeneID:1063284; Name=lp_1124; func=LPXTG cell wall anchor domain-containing protein
gene963	4251.59	4459.33	4003.84	910.673	1135.57	1298.01	-1.92675	down	3.65e-05	0.000341501	Dbxref=GeneID:1063277; Name=cydA; func=cytochrome D ubiquinol oxidase subunit I
gene964	5974.52	6033.47	5730.95	1315.21	1641.79	2173.96	-1.78962	down	0.000113892	0.000891464	Dbxref=GeneID:1063276; Name=cydB; func=MULTISPECIES: cytochrome d ubiquinol oxidase subunit II
gene965	613.944	557.732	571.158	186.814	219.647	248.919	-1.41103	down	0.00208673	0.0101098	Dbxref=GeneID:1063275; Name=cydC; func=MULTISPECIES: thiol reductant ABC exporter subunit CydD
gene971	103.764	139.113	156.729	374.003	408.528	436.713	1.60933	up	0.00114716	0.00617534	Dbxref=GeneID:1063254; Name=acm1; func=cell wall hydrolase
gene982	266.659	279.502	295.018	804.482	677.224	739.728	1.401	up	0.00372283	0.0159712	Dbxref=GeneID:1063225; Name=rumA; func=MULTISPECIES: RNA methyltransferase
gene990	23664.9	23054.5	23892.8	90639.4	101778	94528.3	2.02279	up	3.05e-05	0.000294851	Dbxref=GeneID:1063203; Name=cspP; func=MULTISPECIES: cold-shock protein
gene999	1449.17	1395.76	1327.84	191.451	252.732	395.957	-2.3123	down	1.41e-06	1.99e-05	Dbxref=GeneID:1063180; Name=lp_1168; func=MULTISPECIES: hypothetical protein
gene1000	907.313	1252.19	984.965	349.127	297.991	297.03	-1.73573	down	0.000189227	0.00135992	Dbxref=GeneID:1063179; Name=gdh; func=Glu/Leu/Phe/Val dehydrogenase, dimerization domain protein
gene1001	375.827	351.514	344.69	56.782	45.574	113.619	-2.31139	down	1.81e-06	2.48e-05	Dbxref=GeneID:1063173; Name=pbpX1; func=MULTISPECIES: D-Ala-D-Ala carboxypeptidase
gene1040	0	0	0	0	0	58.645	14.2548	up	4.93e-05	0.000447123	Dbxref=GeneID:1063076; Name=lp_1213; func=transposase
gene1041	0	0	0	0	0	32.509	13.4037	up	0.000428911	0.00275169	Dbxref=GeneID:1063075; Name=lp_1214; func=transposase
gene1058	0	0	0	40.022	42.829	21.145	15.0812	up	4.93e-05	0.000447123	Dbxref=GeneID:1063030; Name=lp_1236; func=hypothetical protein
gene1059	0	0	0	14.572	23.391	17.323	14.1697	up	0.00487477	0.0200265	Dbxref=GeneID:1063029; Name=lp_1237; func=hypothetical protein
gene1060	0	2.324	5.237	31.055	22.848	10.938	3.09975	up	0.000882625	0.00494059	Dbxref=GeneID:1063023; Name=lp_1238; func=sigma-70 family RNA polymerase sigma factor
gene1064	10.501	19.173	17.673	364.897	495.387	138.44	4.39865	up	2.6e-14	1.35e-12	Dbxref=GeneID:1063014; Name=lp_1242; func=gamma-D-glutamate-meso-diaminopimelate muropeptidase
gene1066	2806.92	3028.89	3061.84	7421.5	9354.37	5170.67	1.3025	up	0.00679027	0.0257499	Dbxref=GeneID:1062993; Name=lp_1244; func=MULTISPECIES: type II toxin-antitoxin system Phd/YefM family antitoxin
gene1072	139.962	126.591	113.776	261.345	212.301	597.929	1.49441	up	0.00237063	0.0110289	Dbxref=GeneID:1062968; Name=lp_1251; func=MULTISPECIES: decarboxylating 6-phosphogluconate dehydrogenase
gene1073	733.015	837.077	853.983	4953.9	3711.44	1533.37	2.07288	up	1.94e-05	0.000199873	Dbxref=GeneID:1062967; Name=gshR2; func=NAD(P)/FAD-dependent oxidoreductase
gene1074	204.583	173.835	220.442	1128.15	930.037	705.463	2.20628	up	6.56e-06	7.91e-05	Dbxref=GeneID:1062966; Name=prfC; func=MULTISPECIES: peptide chain release factor 3
gene1075	14.087	11.399	2.964	35.153	26.647	23.732	1.58793	up	0.00590168	0.023065	Dbxref=GeneID:1062964; Name=lp_1256; func=hypothetical protein
gene1082	253.741	311.879	322.206	609.489	444.011	961.345	1.18232	up	0.0146535	0.0474953	Dbxref=GeneID:1062936; Name=oppC; func=MULTISPECIES: ABC transporter permease
gene1085	1215.38	1037.05	1024.63	3734.07	3575.94	3678.21	1.74548	up	0.000317912	0.00212648	Dbxref=GeneID:1062924; Name=lp_1267; func=MULTISPECIES: MarR family transcriptional regulator
gene1086	4.642	9.245	0	20.591	16.526	19.718	2.03281	up	0.0110351	0.0382352	Dbxref=GeneID:1062923; Name=lp_1268; func=integrase/recombinase
gene1087	60589.4	57973.8	58237.3	17284.1	20026.1	23380	-1.54259	down	0.000767328	0.00443142	Dbxref=GeneID:1062922; Name=clpE; func=ATP-dependent Clp protease ATP-binding subunit
gene1091	222.749	299.758	258.469	1350.88	1114.21	1538.24	2.35784	up	1.69e-06	2.34e-05	Dbxref=GeneID:1062914; Name=lp_1275; func=MULTISPECIES: glycosyltransferase family 4 protein
gene1092	235.428	253.178	233.249	1212.44	989.842	1425	2.3291	up	2.3e-06	3.05e-05	Dbxref=GeneID:1062905; Name=lp_1276; func=MULTISPECIES: glycosyltransferase
gene1093	156.496	176.398	153.816	955.252	790.453	1275.97	2.63421	up	1.31e-07	2.35e-06	Dbxref=GeneID:1062904; Name=lp_1277; func=MULTISPECIES: UPF0104 family protein
gene1094	46.528	67.964	52.207	360.066	264.143	310.804	2.48772	up	8.5e-07	1.3e-05	Dbxref=GeneID:1062903; Name=dacA2; func=D-alanyl-D-alanine carboxypeptidase
gene1099	546.595	646.439	536.64	1989.08	2812.8	745.65	1.68134	up	0.000986706	0.00542592	Dbxref=GeneID:1062884; Name=lp_tRNA22; func=_
gene1104	14.234	28.353	31.943	315.726	506.811	58.384	3.56307	up	1.37e-06	1.95e-05	Dbxref=GeneID:1062852; Name=lp_tRNA25; func=_
gene1105	35.098	17.478	19.691	428.177	671.698	102.829	4.05674	up	1.39e-07	2.48e-06	Dbxref=GeneID:1062839; Name=lp_tRNA26; func=_
gene1106	52.647	34.955	39.382	544.952	906.012	221.083	3.71887	up	6.11e-08	1.17e-06	Dbxref=GeneID:1062837; Name=lp_tRNA27; func=_
gene1107	105.294	104.866	157.526	1732.17	2530.58	982.021	3.83432	up	4.68e-11	1.62e-09	Dbxref=GeneID:1062829; Name=lp_tRNA28; func=_
gene1108	123.478	169.091	173.184	2139.71	2582.91	940.579	3.60397	up	1.3e-10	4.24e-09	Dbxref=GeneID:1062827; Name=lp_tRNA29; func=_
gene1109	138.495	224.139	174.822	1958.36	1957.04	796.302	3.13202	up	1.79e-08	3.84e-07	Dbxref=GeneID:1062822; Name=lp_tRNA30; func=_
gene1110	140.392	192.254	118.145	1518.08	1687.06	724.947	3.12402	up	4.18e-08	8.26e-07	Dbxref=GeneID:1062820; Name=lp_tRNA31; func=_
gene1111	320.27	212.644	279.5	5762.01	7317.09	3143.36	4.31963	up	8.07e-15	4.73e-13	Dbxref=GeneID:1062811; Name=lp_tRNA32; func=_
gene1112	577.389	395.339	485.892	9084.92	11001.7	5566.47	4.13646	up	2.48e-14	1.32e-12	Dbxref=GeneID:1062807; Name=lp_tRNA33; func=_
gene1113	291.155	217.477	343.023	3648.79	3887.47	1799.87	3.45448	up	1.24e-10	4.09e-09	Dbxref=GeneID:1062800; Name=lp_tRNA34; func=_
gene1114	10.143	12.122	13.657	23.623	42.435	30.311	1.42363	up	0.0105945	0.0369363	Dbxref=GeneID:1062796; Name=ISP1_2; func=ISL3-like element ISP1 family transposase
gene1115	707.78	505.178	836.515	62.796	52.501	57.37	-3.56917	down	7.72e-12	2.97e-10	Dbxref=GeneID:1062790; Name=lp_1289; func=MULTISPECIES: adenine phosphoribosyltransferase
gene1116	559.429	384.898	496.542	63.498	59.458	47.527	-3.07922	down	8.61e-10	2.49e-08	Dbxref=GeneID:1062789; Name=lp_1290; func=integral membrane protein
gene1117	1151.01	975.232	961.04	427.319	650.99	327.153	-1.13529	down	0.0125484	0.0418778	Dbxref=GeneID:1062788; Name=lp_1291; func=hypothetical protein
gene1122	12.042	5.535	7.275	116.086	54.419	73.274	3.29398	up	5.2e-09	1.28e-07	Dbxref=GeneID:1062767; Name=lp_1297; func=amino acid permease
gene1124	1578.03	1430.13	1512.33	197.408	226.999	382.598	-2.48582	down	2.12e-07	3.68e-06	Dbxref=GeneID:1062764; Name=tagE1; func=glycosyltransferase
gene1129	272.67	320.723	281.332	82.552	88.576	90.446	-1.7416	down	0.000206513	0.00146172	Dbxref=GeneID:1062751; Name=lp_1310; func=glycosyl transferase family 1
gene1133	1736.14	1563.69	1972.23	813.235	840.846	639.446	-1.2008	down	0.00830715	0.0303551	Dbxref=GeneID:1062739; Name=lp_1314; func=rRNA methyltransferase
gene1137	278.346	394.296	366.632	1207.94	1117.24	1095.08	1.71853	up	0.00040919	0.00264937	Dbxref=GeneID:1062736; Name=rsuA; func=MULTISPECIES: rRNA pseudouridine synthase
gene1139	3861.49	3679.48	3707.22	1386.36	1329.57	1470.03	-1.42606	down	0.00180262	0.00890222	Dbxref=GeneID:1062728; Name=pepV; func=putative dipeptidase PepV
gene1145	145.45	146.715	142.278	531.496	366.829	348.557	1.52108	up	0.00204543	0.00997857	Dbxref=GeneID:1062713; Name=glpQ1; func=glycerophosphoryl diester phosphodiesterase
gene1147	1220.56	1383.03	1456.29	4184	3762.18	2729.74	1.39485	up	0.00378042	0.0161689	Dbxref=GeneID:1062706; Name=mscL; func=MULTISPECIES: large conductance mechanosensitive channel protein MscL
gene1148	14.321	20.314	37.007	73.156	91.937	67.132	1.6966	up	0.000629687	0.00377792	Dbxref=GeneID:1062705; Name=lp_1332; func=YhgE/Pip domain-containing protein
gene1150	19.095	20.746	11.686	34.653	58.716	44.246	1.41718	up	0.0134223	0.0442166	Dbxref=GeneID:1062701; Name=lp_1334; func=ABC transporter permease
gene1165	101.328	72.083	64.969	208.701	238.373	209.929	1.46263	up	0.00991534	0.0350026	Dbxref=GeneID:1062654; Name=pltA; func=MULTISPECIES: peptide pheromone precursor
gene1168	313.657	338.726	424.02	2770.29	2664.12	1826.81	2.75399	up	4.16e-08	8.26e-07	Dbxref=GeneID:1062644; Name=lp_1357; func=hypothetical protein HMPREF0531_12577
gene1169	950.479	1022.07	1124.44	2849.18	2820.16	1793.9	1.26894	up	0.00854403	0.031019	Dbxref=GeneID:1062643; Name=lp_1358; func=MULTISPECIES: hypothetical protein
gene1170	65.401	84.292	73.382	17.066	27.395	20.288	-1.78455	down	0.000736647	0.00427681	Dbxref=GeneID:1062642; Name=lp_1359; func=CPBP family intramembrane metalloprotease
gene1172	18227.3	16558.9	17145.5	2583.97	3910	4089.82	-2.29476	down	1.3e-06	1.87e-05	Dbxref=GeneID:1062633; Name=lp_1362; func=MULTISPECIES: hypothetical protein
gene1173	1579.11	1639.13	1517.29	5589.35	7978.31	5255.88	1.99094	up	4.29e-05	0.000396798	Dbxref=GeneID:1062632; Name=lp_1363; func=MULTISPECIES: hypothetical protein
gene1182	238.694	224.668	251.569	58.912	52.81	95.196	-1.78873	down	0.000148709	0.00111433	Dbxref=GeneID:1062572; Name=lp_1374; func=bifunctional homocysteine S-methyltransferase/methylenetetrahydrofolate reductase
gene1183	140.491	181.951	185.053	43.11	43.992	72.397	-1.66983	down	0.00038308	0.00250338	Dbxref=GeneID:1062571; Name=metE; func=5-methyltetrahydropteroyltriglutamate--homocysteine methyltransferase
gene1191	223.929	217.831	274.631	623.752	695.32	660.637	1.46647	up	0.00345979	0.0150496	Dbxref=GeneID:1062546; Name=lp_1388; func=MULTISPECIES: hypothetical protein
gene1205	33.514	19.38	31.539	85.126	82.758	67.781	1.48083	up	0.00444017	0.0185945	Dbxref=GeneID:1062497; Name=lp_1402; func=MFS transporter
gene1218	59.97	49.428	53.367	16.054	10.124	26.052	-1.63978	down	0.00125321	0.00660697	Dbxref=GeneID:1062464; Name=lp_1419; func=hypothetical protein
gene1224	98.768	86.794	117.341	505.807	641.271	365.114	2.3197	up	5.62e-06	6.89e-05	Dbxref=GeneID:1062447; Name=lp_1427; func=nucleoside 2-deoxyribosyltransferase
gene1225	185.217	211.363	194.832	494.987	487.729	518.901	1.34428	up	0.00575157	0.0226993	Dbxref=GeneID:1062440; Name=lp_1430; func=MULTISPECIES: glycosyltransferase
gene1229	128.108	121.511	130.053	30.445	32.581	86.683	-1.34258	down	0.00917579	0.0329297	Dbxref=GeneID:1062429; Name=ribB; func=MULTISPECIES: riboflavin synthase
gene1237	69.934	62.256	77.592	148.62	146.062	194.245	1.22072	up	0.0119946	0.0405105	Dbxref=GeneID:1062404; Name=lp_1446; func=WxL domain-containing protein
gene1253	10.143	12.122	12.519	23.623	41.532	29.717	1.44748	up	0.0103722	0.0363869	Dbxref=GeneID:1062362; Name=ISP1_3; func=ISL3-like element ISP1 family transposase
gene1257	1481.75	1506.1	1423.02	388.13	444.412	459.517	-1.77139	down	0.000142369	0.00108123	Dbxref=GeneID:1062354; Name=sufC; func=MULTISPECIES: Fe-S cluster assembly ATPase SufC
gene1258	875.7	940.731	914.126	286.991	327.559	427.504	-1.38976	down	0.00239496	0.0111054	Dbxref=GeneID:1062353; Name=sufD; func=Fe-S cluster assembly protein SufD
gene1259	1310.03	1397.38	1346.94	385.293	488.711	681.284	-1.38229	down	0.00246991	0.0113406	Dbxref=GeneID:1062348; Name=sufS; func=cysteine desulfurase
gene1260	1459.01	1352.2	1452.79	367.336	445.896	871.754	-1.33947	down	0.00347229	0.0150696	Dbxref=GeneID:1062347; Name=sufU; func=MULTISPECIES: SUF system NifU family Fe-S cluster assembly protein
gene1261	1050.72	962.114	1046.15	307.985	368.762	585.265	-1.27732	down	0.00495239	0.0201134	Dbxref=GeneID:1062346; Name=sufB; func=MULTISPECIES: Fe-S cluster assembly protein SufB
gene1266	25.494	38.086	32.181	120.165	96.445	105.502	1.75002	up	0.00209809	0.0101299	Dbxref=GeneID:1062332; Name=moaE; func=molybdenum cofactor biosynthesis protein MoaE
gene1267	10.415	36.305	17.53	80.857	97.345	105.275	2.14141	up	0.000939825	0.00519864	Dbxref=GeneID:1062331; Name=moaD; func=MULTISPECIES: MoaD/ThiS family protein
gene1268	37.189	51.086	54.677	93.865	101.591	146.148	1.25678	up	0.0128954	0.0428829	Dbxref=GeneID:1062330; Name=moaA; func=MULTISPECIES: GTP 3',8-cyclase MoaA
gene1269	35.496	27.853	50.69	77.54	88.086	107.777	1.26148	up	0.0126808	0.0422194	Dbxref=GeneID:1062324; Name=narK; func=NarK/NasA family nitrate transporter
gene1281	5.145	7.686	14.432	17.118	34.347	42.959	1.7921	up	0.0098427	0.0347899	Dbxref=GeneID:1062291; Name=mobB; func=molybdopterin-guanine dinucleotide biosynthesis protein B
gene1291	287.681	306.656	237.05	720.355	834.238	781.602	1.49057	up	0.00230518	0.0108139	Dbxref=GeneID:1063380; Name=lp_1505; func=DUF2975 domain-containing protein
gene1292	216.608	369.817	305.541	741.271	875.902	995.433	1.55043	up	0.00190442	0.00935561	Dbxref=GeneID:1062158; Name=lp_1506; func=transcriptional regulator
gene1301	3929.14	4042.69	4287.51	30165.5	24776.9	8180.26	2.36428	up	1.33e-06	1.9e-05	Dbxref=GeneID:1061201; Name=infC; func=MULTISPECIES: translation initiation factor IF-3
gene1302	4736.72	4789.41	5248.46	33588.4	29192.3	11098.1	2.32204	up	2.04e-06	2.78e-05	Dbxref=GeneID:1061110; Name=rpmI; func=MULTISPECIES: 50S ribosomal protein L35
gene1303	3218.85	3388.02	3764.7	28112.9	22844.8	8002.77	2.50712	up	3.36e-07	5.66e-06	Dbxref=GeneID:1064215; Name=rplT; func=MULTISPECIES: 50S ribosomal protein L20
gene1306	132.825	143.411	158.786	46.808	59.668	35.642	-1.61398	down	0.000795728	0.00452631	Dbxref=GeneID:1061207; Name=lp_1521; func=zinc-binding alcohol dehydrogenase family protein
gene1321	10.143	12.122	13.657	23.623	42.435	29.717	1.41471	up	0.0113676	0.038996	Dbxref=GeneID:1061831; Name=ISP1_4; func=ISL3-like element ISP1 family transposase
gene1344	287.503	286.333	313.103	103.158	143.011	135.019	-1.21833	down	0.0117192	0.0398196	Dbxref=GeneID:1064178; Name=lp_1566; func=HesB-like protein
gene1345	286.137	327.405	323.231	957.918	864.078	796.329	1.48287	up	0.00206687	0.0100483	Dbxref=GeneID:1061244; Name=lp_1567; func=membrane protein
gene1346	733.304	838.051	794.573	2481.64	2269.45	1714.86	1.45046	up	0.00253462	0.011543	Dbxref=GeneID:1062249; Name=pbp2x; func=MULTISPECIES: penicillin-binding protein 2
gene1357	6139.77	5558.9	6666.5	1521.45	1972.37	1925.89	-1.76068	down	0.000149966	0.0011173	Dbxref=GeneID:1063409; Name=glnR; func=MULTISPECIES: MerR family transcriptional regulator
gene1358	5869.96	5739.98	5963.14	1285.76	1737.15	2372.34	-1.70361	down	0.000225685	0.00157755	Dbxref=GeneID:1061486; Name=glnA; func=MULTISPECIES: type I glutamate--ammonia ligase
gene1364	0	0	0	38.399	30.82	65.936	15.4593	up	0.00487477	0.0200265	Dbxref=GeneID:1063534; Name=lp_tRNA39; func=_
gene1367	10580.3	10818	10704	31656.9	27452.7	22857.3	1.35236	up	0.00483201	0.0199383	Dbxref=GeneID:1063556; Name=rplU; func=MULTISPECIES: 50S ribosomal protein L21
gene1368	10607	10757.5	11212.8	34804.6	29074.9	21580.2	1.39137	up	0.00372133	0.0159712	Dbxref=GeneID:1063559; Name=lp_1593; func=MULTISPECIES: ribosomal-processing cysteine protease Prp
gene1369	12411.3	12392.8	12818.4	36980.7	31070.8	22609.8	1.26889	up	0.00813937	0.0299367	Dbxref=GeneID:1063563; Name=rpmA; func=MULTISPECIES: 50S ribosomal protein L27
gene1385	3179.83	3147.9	3024.59	8169.42	10765.2	2234.09	1.17854	up	0.0141385	0.0462574	Dbxref=GeneID:1063698; Name=lp_1611; func=hypothetical protein
gene1390	678.14	755.623	688.58	1673.95	1492.94	1644.91	1.18092	up	0.0143062	0.0465822	Dbxref=GeneID:1062180; Name=fmt; func=MULTISPECIES: methionyl-tRNA formyltransferase
gene1391	664.37	766.09	732.618	1852.07	1622.25	1682.27	1.25333	up	0.00916691	0.0329297	Dbxref=GeneID:1063708; Name=sunL; func=16S rRNA (cytosine(967)-C(5))-methyltransferase RsmB
gene1392	890.068	768.595	887.088	2202.48	1879.17	2049.48	1.26806	up	0.0085039	0.0309133	Dbxref=GeneID:1063707; Name=pppL; func=Stp1/IreP family PP2C-type Ser/Thr phosphatase
gene1393	1019.8	1050.94	1188.98	2844.34	2686.1	2678.26	1.3324	up	0.00551501	0.0219507	Dbxref=GeneID:1063711; Name=pkn1; func=Stk1 family PASTA domain-containing Ser/Thr kinase
gene1397	0	0	0	9.107	21.929	26.465	14.2264	up	0.00823669	0.0302155	Dbxref=GeneID:17494177; Name=lp_1623; func=hypothetical protein
gene1398	3188.93	4458.68	3748.14	11702.2	12390.3	8737.46	1.52652	up	0.00153003	0.00777468	Dbxref=GeneID:1063721; Name=rpmB; func=MULTISPECIES: 50S ribosomal protein L28
gene1404	454.636	474.784	454.36	1188.06	989.592	1308.25	1.33292	up	0.00589158	0.0230642	Dbxref=GeneID:1063816; Name=rnc; func=MULTISPECIES: ribonuclease III
gene1415	987.74	814.754	972.099	126.931	164.885	219.504	-2.43997	down	3.2e-07	5.42e-06	Dbxref=GeneID:1063923; Name=lp_1643; func=mucus-binding protein
gene1416	777.896	679.921	674.463	132.726	176.738	252.609	-1.92356	down	5.48e-05	0.000484219	Dbxref=GeneID:1062211; Name=lp_1645; func=MULTISPECIES: alcohol dehydrogenase
gene1431	441.752	392.292	417.185	153.781	167.117	244.466	-1.14609	down	0.0119906	0.0405105	Dbxref=GeneID:1061600; Name=adh1; func=Zn-dependent alcohol dehydrogenase
gene1435	2732.4	3238.52	2722.7	10345.4	7160.42	3198.74	1.25192	up	0.0090348	0.0325313	Dbxref=GeneID:1061766; Name=fabZ1; func=MULTISPECIES: 3-hydroxyacyl-[acyl-carrier-protein] dehydratase FabZ
gene1436	1697.72	2184.61	2085.51	8351.88	5039.61	1619.57	1.33074	up	0.00539619	0.0216618	Dbxref=GeneID:1064006; Name=fabH2; func=3-oxoacyl-ACP synthase III
gene1437	1157.6	1660.16	1443.2	5899.9	3874.36	1248.08	1.37118	up	0.0044364	0.0185945	Dbxref=GeneID:1061849; Name=acpA2; func=MULTISPECIES: acyl carrier protein
gene1438	1348.36	1807.82	1589.95	6634.82	4219.08	1071.67	1.32923	up	0.0054772	0.0218932	Dbxref=GeneID:1062127; Name=fabD; func=ACP S-malonyltransferase
gene1439	1435.72	2163.2	1782.49	8355.06	4830.35	1058.02	1.40424	up	0.00335079	0.0146891	Dbxref=GeneID:1061758; Name=fabG1; func=SDR family oxidoreductase
gene1451	216.538	208.428	217.175	1450.28	987.42	517.803	2.20244	up	7.38e-06	8.78e-05	Dbxref=GeneID:1061738; Name=rsgA; func=ribosome small subunit-dependent GTPase
gene1453	3.759	5.241	10.966	43.357	38.145	29.295	2.47212	up	1.49e-05	0.00015862	Dbxref=GeneID:1061736; Name=lp_1689; func=MULTISPECIES: MFS transporter
gene1454	558.534	666.629	583.593	1584.64	1609.87	1190.48	1.27758	up	0.00804852	0.0296802	Dbxref=GeneID:1063584; Name=lp_1690; func=integral membrane protein
gene1458	472.375	410.234	407.06	1102.25	1237.88	1071.73	1.40355	up	0.0041761	0.0176996	Dbxref=GeneID:1062204; Name=lp_1694; func=MULTISPECIES: hypothetical protein
gene1459	6.374	25.39	7.151	63.617	28.366	72.825	2.0823	up	0.00706902	0.0265916	Dbxref=GeneID:1061709; Name=lp_1695; func=Membrane protein
gene1462	27.257	27.146	30.584	110.84	117.267	102.483	1.95969	up	0.00129832	0.00680652	Dbxref=GeneID:1062223; Name=lp_1698; func=antibiotic biosynthesis monooxygenase
gene1468	807.75	937.685	1119.92	4290.84	4139.98	4430.07	2.1662	up	1e-05	0.000112367	Dbxref=GeneID:1062109; Name=lp_1704; func=integral membrane protein
gene1469	950.135	808.049	1054.12	4179.43	3905.61	5686.21	2.29184	up	3.96e-06	5.01e-05	Dbxref=GeneID:1064129; Name=lp_1705; func=hypothetical protein LP80_2188
gene1470	1650.53	1553.02	1841.2	7816.89	7247.68	7602.13	2.16772	up	9.08e-06	0.000104544	Dbxref=GeneID:1061707; Name=lp_1706; func=MULTISPECIES: GlsB/YeaQ/YmgE family stress response membrane protein
gene1471	7755.73	8775.9	7828.16	23001.1	26987.7	28318.6	1.68465	up	0.000479606	0.00302173	Dbxref=GeneID:1061713; Name=lp_1708; func=MULTISPECIES: CsbD family protein
gene1472	1770.48	1696.38	1582.79	484.232	559.485	601.648	-1.61777	down	0.000532799	0.00331291	Dbxref=GeneID:1064126; Name=lp_1709; func=MULTISPECIES: hypothetical protein
gene1473	2240.11	2034.3	2103.24	590.014	611.341	440.749	-1.95748	down	2.92e-05	0.000285708	Dbxref=GeneID:1062103; Name=pepD4; func=C69 family dipeptidase
gene1474	650.395	719.72	663.429	2455.38	2684.15	2286.61	1.86861	up	0.000145919	0.00109928	Dbxref=GeneID:1061704; Name=xylH; func=MULTISPECIES: 4-oxalocrotonate tautomerase
gene1475	226.073	229.964	255.832	1236.48	1252.98	1147.21	2.35293	up	1.7e-06	2.34e-05	Dbxref=GeneID:1062098; Name=lysA; func=MULTISPECIES: diaminopimelate decarboxylase
gene1482	186.627	218.945	202.305	598.126	518.074	350.305	1.27053	up	0.00923128	0.0330596	Dbxref=GeneID:1064119; Name=lp_1723; func=MULTISPECIES: Cof-type HAD-IIB family hydrolase
gene1488	117.463	97.487	120.815	966.177	911.606	327.65	2.71553	up	6.42e-08	1.22e-06	Dbxref=GeneID:1064116; Name=idi1; func=isopentenyl-diphosphate delta-isomerase, type 2
gene1489	265.132	281.579	258	1319.29	1285.48	702.192	2.03896	up	2.98e-05	0.000289443	Dbxref=GeneID:1061555; Name=mvaK2; func=phosphomevalonate kinase
gene1490	149.328	172.203	138.158	431.461	412.756	397.202	1.43325	up	0.003347	0.0146891	Dbxref=GeneID:1062083; Name=mvaD; func=diphosphomevalonate decarboxylase
gene1498	0	6.164	6.944	13.727	55.088	52.582	3.21092	up	0.000945269	0.00521848	Dbxref=GeneID:1062078; Name=lp_1742; func=MULTISPECIES: hypothetical protein
gene1503	14.645	10.747	8.649	40.178	58.32	55.78	2.18009	up	4.84e-05	0.000441254	Dbxref=GeneID:1061670; Name=lp_1748; func=MULTISPECIES: iron ABC transporter permease
gene1504	8.87	1.262	14.218	23.89	24.814	36.753	1.81115	up	0.00222435	0.010576	Dbxref=GeneID:1064104; Name=lp_1749; func=extracellular solute-binding protein
gene1508	141.593	212.644	166.439	700.414	642.183	568.259	1.87576	up	0.000144957	0.00109792	Dbxref=GeneID:1062159; Name=lp_1753; func=MULTISPECIES: DUF1273 domain-containing protein
gene1509	3581.03	3510.5	3740.68	9442.71	8702.48	6255.45	1.17159	up	0.0147596	0.0477267	Dbxref=GeneID:1064097; Name=gpsB; func=DivIVA domain protein
gene1513	35.664	32.715	35.804	235.234	229.736	70.666	2.3621	up	3.52e-06	4.54e-05	Dbxref=GeneID:1061663; Name=lp_1759; func=DHA2 family efflux MFS transporter permease subunit
gene1515	144.436	125.085	119.786	34.823	53.103	60.715	-1.38906	down	0.00615534	0.0239232	Dbxref=GeneID:1062611; Name=lp_1762; func=nuclear transport factor 2 family protein
gene1516	531.965	444.95	571.241	135.97	121.154	142.156	-1.95507	down	3.5e-05	0.000331339	Dbxref=GeneID:1062126; Name=lp_1763; func=glycosyltransferase
gene1517	237.237	209.1	204.967	72.354	80.245	112.251	-1.29815	down	0.0053438	0.0215562	Dbxref=GeneID:1062125; Name=lp_1764; func=LD-carboxypeptidase
gene1523	119.805	139.4	122.448	1802.27	1620.74	1305.31	3.63098	up	2.46e-12	9.73e-11	Dbxref=GeneID:1064086; Name=lp_1773; func=MULTISPECIES: hypothetical protein
gene1531	1144.43	1069.3	1160.89	576.426	556.044	368.893	-1.16845	down	0.0103854	0.0363878	Dbxref=GeneID:1063520; Name=pyrR2; func=MULTISPECIES: bifunctional pyrimidine operon transcriptional regulator/uracil phosphoribosyltransferase
gene1534	352.297	455.059	404.876	134.973	155.844	248.342	-1.16888	down	0.0116515	0.0396858	Dbxref=GeneID:1064081; Name=pgm5; func=histidine phosphatase family protein
gene1538	1418.72	1147.58	1512.67	438.364	430.371	692.753	-1.38528	down	0.0024979	0.0114371	Dbxref=GeneID:1064078; Name=lp_1789; func=hypothetical protein LPST_C1434
gene1543	193.828	168.909	186.9	607.941	506.811	538.59	1.58883	up	0.00137535	0.00712963	Dbxref=GeneID:1061625; Name=lp_1795; func=MULTISPECIES: MarR family transcriptional regulator
gene1544	622.87	589.539	522.101	1549.78	1516.5	1446.52	1.37949	up	0.0042786	0.0180795	Dbxref=GeneID:1064035; Name=lp_1796; func=MULTISPECIES: DegV family protein
gene1545	223.821	240.508	231.31	875.324	862.453	589.307	1.74211	up	0.000415616	0.00267862	Dbxref=GeneID:1063725; Name=lp_1797; func=GNAT family N-acetyltransferase
gene1551	692.476	685.826	716.556	230.395	219.162	329.116	-1.42776	down	0.00235083	0.0110079	Dbxref=GeneID:1061592; Name=lp_1805; func=hypothetical protein HMPREF0531_10817
gene1559	299.868	316.604	308.781	106.295	128.392	122.051	-1.37498	down	0.00291619	0.0130997	Dbxref=GeneID:1064051; Name=lp_1815; func=hypothetical protein
gene1560	3.65	10.905	16.381	34.406	37.361	32.614	1.7544	up	0.00444929	0.0186049	Dbxref=GeneID:1063386; Name=tarI; func=2-C-methyl-D-erythritol 4-phosphate cytidylyltransferase
gene1561	6.243	16.166	14.01	33.234	54.46	42.8	1.84113	up	0.00124599	0.00659364	Dbxref=GeneID:1063332; Name=tarJ; func=MULTISPECIES: ribitol-5-phosphate 2-dehydrogenase
gene1563	170.676	180.059	183.18	475.086	456.37	410.903	1.33008	up	0.00593838	0.0231762	Dbxref=GeneID:1062225; Name=tarL; func=MULTISPECIES: ribitolphosphotransferase
gene1565	775.083	766.103	951.723	2643.67	2067.16	1067.71	1.21287	up	0.0119013	0.0403897	Dbxref=GeneID:1063149; Name=lp_1821; func=MULTISPECIES: MarR family transcriptional regulator
gene1570	1129.75	1065.46	1131.45	164.51	214.728	381.912	-2.12782	down	7.24e-06	8.66e-05	Dbxref=GeneID:1062980; Name=lp_1833; func=integrase
gene1571	25.494	50.781	57.211	3428.22	3840.8	649.82	5.8905	up	4.29e-22	6.34e-20	Dbxref=GeneID:1062228; Name=lp_1834; func=MULTISPECIES: hypothetical protein
gene1583	393.213	400.272	423.857	1662.92	1369.08	1243.45	1.81234	up	0.000181703	0.00131256	Dbxref=GeneID:1064052; Name=gidC; func=MULTISPECIES: FADH(2)-oxidizing methylenetetrahydrofolate--tRNA-(uracil(54)-C(5))-methyltransferase TrmFO
gene1588	31.219	47.748	47.539	116.233	105.2	131.969	1.48208	up	0.00347512	0.0150696	Dbxref=GeneID:1064055; Name=lp_1856; func=MULTISPECIES: 5-methyltetrahydropteroyltriglutamate--homocysteine methyltransferase
gene1591	549.82	624.244	538.779	3000.08	2889.15	807.571	1.96708	up	5.16e-05	0.00046217	Dbxref=GeneID:1061559; Name=lp_1859; func=NADP oxidoreductase
gene1592	278.233	283.124	252.466	1447.6	1359.99	388.441	1.97349	up	5.15e-05	0.00046217	Dbxref=GeneID:1064057; Name=lp_1860; func=LLM class flavin-dependent oxidoreductase
gene1603	3430.87	3328.3	3389.23	1290.76	1243.74	1774.22	-1.23592	down	0.0063379	0.02443	Dbxref=GeneID:1063985; Name=lp_1873; func=CCA-adding enzyme
gene1604	3316.79	3129.61	3418.01	1321.35	1446.44	1583.92	-1.18065	down	0.00903797	0.0325313	Dbxref=GeneID:1064076; Name=dapB; func=4-hydroxy-tetrahydrodipicolinate reductase
gene1607	34097.2	37846.1	32769.2	86677.2	87139.8	117336	1.47534	up	0.0021615	0.0103754	Dbxref=GeneID:1064043; Name=hbsU; func=MULTISPECIES: HU family DNA-binding protein
gene1608	9465.76	11541.9	8385	21548.3	26364.7	40518	1.5891	up	0.0010021	0.0054998	Dbxref=GeneID:1064015; Name=lp_1880; func=MULTISPECIES: hypothetical protein
gene1613	1813.97	1703.81	1839.71	654.146	677.068	782.453	-1.34181	down	0.00323415	0.0143343	Dbxref=GeneID:1062038; Name=recQ2; func=ATP-dependent DNA helicase RecQ
gene1614	2356.01	2208.32	2574.71	668.197	756.94	795.234	-1.68493	down	0.00027254	0.00187246	Dbxref=GeneID:1061166; Name=lp_1886; func=hypothetical protein
gene1615	6668.19	6741.38	6712.92	590.166	853.782	1692.5	-2.6816	down	2.76e-08	5.67e-07	Dbxref=GeneID:1061641; Name=lp_1887; func=ECF transporter S component
gene1620	335.008	320.757	409.772	959.936	828.047	848.804	1.3072	up	0.0068415	0.0259092	Dbxref=GeneID:1064168; Name=lp_1892; func=tyrosine recombinase XerD
gene1621	777.593	646.554	739.758	2295.95	2118.85	1921.86	1.55008	up	0.00131209	0.00686588	Dbxref=GeneID:1061645; Name=lp_1893; func=MULTISPECIES: RNA-binding protein
gene1622	318.177	336.34	341.35	1488.87	1257.09	1122.71	1.95781	up	6.78e-05	0.000575476	Dbxref=GeneID:1062044; Name=lp_1894; func=MULTISPECIES: DUF441 domain-containing protein
gene1626	3900.61	3510.22	4491.07	11959.9	13315.1	10077.8	1.57063	up	0.00111348	0.0060403	Dbxref=GeneID:1061648; Name=lp_1900; func=MULTISPECIES: DUF2929 family protein
gene1627	5865.23	5614.99	5015.55	1264.18	1213.89	2169.09	-1.82767	down	8.18e-05	0.000673747	Dbxref=GeneID:1064079; Name=clpB; func=chaperone protein ClpB
gene1631	43.553	71.939	57.211	1050.85	831.132	444.106	3.75152	up	8.95e-13	3.7e-11	Dbxref=GeneID:1062047; Name=lp_1908; func=O-antigen ligase domain-containing protein
gene1632	4.985	8.274	14.915	117.937	96.136	38.944	3.16666	up	1.24e-07	2.25e-06	Dbxref=GeneID:1061647; Name=drrB; func=MULTISPECIES: ABC transporter permease
gene1633	0	6.772	4.578	55.805	49.632	20.32	3.46953	up	1.89e-07	3.32e-06	Dbxref=GeneID:1062057; Name=drrA; func=daunorubicin resistance protein DrrA family ABC transporter ATP-binding protein
gene1635	251.727	241.654	209.887	71.72	77.068	86.59	-1.57908	down	0.000676089	0.0039912	Dbxref=GeneID:1062050; Name=pps; func=phosphoenolpyruvate synthase
gene1641	154.72	179.305	183.703	46.797	46.074	91.648	-1.48841	down	0.00138364	0.00713401	Dbxref=GeneID:1064088; Name=mntA; func=HAD family hydrolase
gene1642	137.046	134.51	148.2	25.332	27.403	56.736	-1.93897	down	6.71e-05	0.000571062	Dbxref=GeneID:1061655; Name=enoA2; func=enolase
gene1643	35.815	45.73	35.034	193.51	180.654	92.554	2.00122	up	7.62e-05	0.000633181	Dbxref=GeneID:1062184; Name=lp_1921; func=DHA2 family efflux MFS transporter permease subunit
gene1647	226.273	186.382	219.528	105.661	71.176	64.798	-1.3875	down	0.00345979	0.0150496	Dbxref=GeneID:1064093; Name=lp_1926; func=MULTISPECIES: DeoR/GlpR transcriptional regulator
gene1648	262.135	273.701	263.292	105.503	111.022	125.728	-1.22336	down	0.00936571	0.0334404	Dbxref=GeneID:1061660; Name=mutT; func=MULTISPECIES: NUDIX domain-containing protein
gene1657	9.977	13.911	17.912	4.426	0	6.431	-1.94458	down	0.0112999	0.0388176	Dbxref=GeneID:1064099; Name=lp_1936; func=NAD-dependent epimerase/dehydratase family protein
gene1660	607.327	556.251	652.547	327.754	243.752	176.344	-1.28004	down	0.00534693	0.0215562	Dbxref=GeneID:1062066; Name=lp_1939; func=NADP-dependent oxidoreductase
gene1668	52.01	59.977	36.857	151.792	138.886	110.673	1.43105	up	0.00830359	0.0303551	Dbxref=GeneID:1061672; Name=lp_1947; func=MULTISPECIES: GNAT family N-acetyltransferase
gene1672	126.87	178.745	180.547	840.793	652.795	485.024	2.02497	up	5.14e-05	0.00046217	Dbxref=GeneID:1062231; Name=lp_1953; func=MULTISPECIES: DUF2992 family protein
gene1688	8133.71	8025.89	9242.93	39698.3	34620.7	27414.9	2.00176	up	3.59e-05	0.000336995	Dbxref=GeneID:1061681; Name=lp_1972; func=MULTISPECIES: GatB/YqeY domain-containing protein
gene1689	14213.9	14216.8	16207.2	65250.1	66669.8	47513.6	2.00711	up	3.44e-05	0.000326957	Dbxref=GeneID:1064112; Name=rpsU; func=MULTISPECIES: 30S ribosomal protein S21
gene1691	19.41	28.118	39.599	152.645	114.661	87.887	2.02737	up	0.00013869	0.00105901	Dbxref=GeneID:1062241; Name=lp_1975; func=MULTISPECIES: SDR family oxidoreductase
gene1692	288.493	339.947	309.28	1523.72	1411.1	1161.55	2.12712	up	1.4e-05	0.000151051	Dbxref=GeneID:1062253; Name=nfo; func=endonuclease
gene1693	177.652	189.017	200.572	1270.25	1188.45	732.228	2.49194	up	4.9e-07	7.91e-06	Dbxref=GeneID:1064114; Name=tagB3; func=CDP-glycerol glycerophosphotransferase family protein
gene1698	555.286	541.004	577.342	1768.85	1513.72	1116.26	1.39413	up	0.00383205	0.01634	Dbxref=GeneID:1061686; Name=lytH; func=MULTISPECIES: N-acetylmuramoyl-L-alanine amidase
gene1725	3556.55	4957.71	4170.57	12346.7	8677.36	8113.59	1.19978	up	0.0123022	0.041252	Dbxref=GeneID:1064125; Name=dltD; func=MULTISPECIES: D-alanyl-lipoteichoic acid biosynthesis protein DltD
gene1726	2831.03	4184.63	3354	11120.6	7635.02	8136.72	1.37482	up	0.00424692	0.0179727	Dbxref=GeneID:1062105; Name=dltC1; func=MULTISPECIES: D-alanine--poly(phosphoribitol) ligase subunit 2
gene1727	2319.65	3345.61	2726.97	9006.39	6419.61	5734.94	1.33428	up	0.00538295	0.0216396	Dbxref=GeneID:1062234; Name=dltB; func=MULTISPECIES: D-alanyl-lipoteichoic acid biosynthesis protein DltB
gene1728	2446.39	3367.22	3016.06	9828.15	6903.19	5334.71	1.3214	up	0.00579736	0.0228447	Dbxref=GeneID:1062221; Name=dltA; func=D-alanine--poly(phosphoribitol) ligase
gene1729	2058.27	2364.61	2462.8	7624.79	6066.53	6428.1	1.54692	up	0.00137772	0.00712963	Dbxref=GeneID:1061714; Name=dltX; func=MULTISPECIES: teichoic acid D-Ala incorporation-associated protein DltX
gene1730	1235.33	1364.83	1295.64	3421.44	2900.26	2795.49	1.22667	up	0.0106774	0.0371396	Dbxref=GeneID:1062107; Name=pbpX2; func=peptidase S12
gene1733	33711.8	34248.4	31448.9	4508.6	6096.99	20426.7	-1.67961	down	0.000260179	0.00180074	Dbxref=GeneID:1064049; Name=dnaK; func=MULTISPECIES: molecular chaperone DnaK
gene1734	13861.3	14070.7	12632.6	1816.22	2537.22	10073.8	-1.49143	down	0.0010732	0.0058557	Dbxref=GeneID:1062226; Name=grpE; func=MULTISPECIES: nucleotide exchange factor GrpE
gene1735	15877.3	15952	14216	2071.27	2797.29	9457.24	-1.68444	down	0.000251085	0.00174641	Dbxref=GeneID:1062999; Name=hrcA; func=MULTISPECIES: HrcA family transcriptional regulator
gene1737	2764.17	2582.29	2879.16	1349.87	1410.04	993.006	-1.13211	down	0.0122202	0.041075	Dbxref=GeneID:1061729; Name=ribC2; func=riboflavin biosynthesis protein RibF
gene1744	14.968	20.168	28.65	44.918	27.43	94.154	1.38419	up	0.00695909	0.0262484	Dbxref=GeneID:1061725; Name=lp_2038; func=MFS transporter
gene1771	6.519	3.246	0	10.846	43.524	40.111	3.27393	up	0.000122507	0.000950948	Dbxref=GeneID:1061757; Name=lp_2069; func=hypothetical protein
gene1773	11.179	0	0	61.988	63.683	80.568	4.20509	up	4.62e-09	1.15e-07	Dbxref=GeneID:1061767; Name=lp_2074; func=transposase
gene1774	43.243	63.524	65.503	1141.41	1000.79	1174.76	4.26709	up	1.75e-15	1.05e-13	Dbxref=GeneID:1061632; Name=lp_2075; func=LytR family transcriptional regulator
gene1775	22.645	27.386	30.854	805.461	814.929	990.447	5.01244	up	1.24e-18	1.09e-16	Dbxref=GeneID:1061768; Name=lp_2076; func=ABC transporter ATP-binding protein
gene1776	65.414	46.848	57.728	1328.66	1095.18	942.732	4.30774	up	8.22e-16	5.25e-14	Dbxref=GeneID:1061556; Name=lp_2077; func=ABC transporter permease subunit
gene1783	821.206	645.567	769.086	250.152	259.253	408.69	-1.28411	down	0.00521413	0.021112	Dbxref=GeneID:1061782; Name=lp_2085; func=MULTISPECIES: ArsR family transcriptional regulator
gene1792	2068.15	1758.14	1894.65	745.981	1106.79	802.579	-1.10735	down	0.0140572	0.0461456	Dbxref=GeneID:1062153; Name=fruK; func=1-phosphofructokinase
gene1794	181.075	206.376	225.99	12.887	36.201	74.612	-2.31005	down	2.22e-06	2.95e-05	Dbxref=GeneID:1061794; Name=lp_2098; func=metallophosphoesterase
gene1795	38.821	39.541	36.629	145.795	128.012	62.296	1.54736	up	0.00221781	0.010576	Dbxref=GeneID:1061518; Name=cps4J; func=hypothetical protein
gene1796	25.119	34.234	37.085	123.163	123.565	50.353	1.62315	up	0.00179341	0.00887232	Dbxref=GeneID:1062269; Name=cps4I; func=glycosyltransferase
gene1797	23.11	14.01	30.44	85.803	68.867	35.031	1.48944	up	0.00458027	0.0190885	Dbxref=GeneID:1061510; Name=cps4H; func=polysaccharide polymerase
gene1798	17.43	9.919	26.541	96.651	63.167	31.368	1.82683	up	0.000792522	0.00452445	Dbxref=GeneID:1064038; Name=cps4G; func=glycosyltransferase
gene1799	19.944	14.021	14.48	72.86	73.098	30.246	1.86276	up	0.000707136	0.00414833	Dbxref=GeneID:1061507; Name=cps4F; func=MULTISPECIES: glycosyltransferase family 1 protein
gene1800	11.541	9.579	4.317	57.599	66.776	28.178	2.58417	up	4.01e-05	0.000374178	Dbxref=GeneID:1063981; Name=cps4E; func=sugar transferase
gene1801	9.52	14.899	10.682	72.396	41.158	26.297	1.99421	up	0.000665877	0.00395584	Dbxref=GeneID:1064039; Name=cps4D; func=MULTISPECIES: SDR family NAD(P)-dependent oxidoreductase
gene1815	91.006	87.847	114.68	386.635	353.937	346.203	1.88845	up	0.000136392	0.001048	Dbxref=GeneID:1063886; Name=lp_2121; func=hypothetical protein
gene1819	2049.73	2376.89	2273.27	7161.73	7247.4	6772.57	1.66061	up	0.000586044	0.00355677	Dbxref=GeneID:1063870; Name=rpsO; func=MULTISPECIES: 30S ribosomal protein S15
gene1821	429.44	486.559	419.589	1272.27	1143.55	1264.87	1.4625	up	0.00245779	0.0113034	Dbxref=GeneID:1063812; Name=holA; func=MULTISPECIES: DNA polymerase III subunit delta
gene1822	242.578	256.064	263.403	635.379	560.71	578.22	1.21931	up	0.0114154	0.0390711	Dbxref=GeneID:1063814; Name=comEC; func=DNA internalization-related competence protein ComEC/Rec2
gene1831	29.006	21.666	30.737	109.909	86.779	81.439	1.77245	up	0.000513022	0.00320354	Dbxref=GeneID:1063717; Name=lp_2141; func=membrane protein
gene1839	848.614	846.063	822.987	221.21	192.879	470.952	-1.50827	down	0.00103326	0.00565977	Dbxref=GeneID:1062177; Name=pdhD; func=MULTISPECIES: dihydrolipoyl dehydrogenase
gene1840	889.64	857.469	793.026	198.425	200.613	443.963	-1.5913	down	0.000563063	0.00347737	Dbxref=GeneID:1063704; Name=pdhC; func=branched-chain alpha-keto acid dehydrogenase subunit E2
gene1841	1020.41	1076.27	1002.38	215.004	265.843	615.184	-1.49954	down	0.00110543	0.00600825	Dbxref=GeneID:1063701; Name=pdhB; func=MULTISPECIES: alpha-ketoacid dehydrogenase subunit beta
gene1842	865.564	962.918	838.178	233.604	223.352	713.897	-1.18747	down	0.00871098	0.0315436	Dbxref=GeneID:1063699; Name=pdhA; func=pyruvate dehydrogenase (acetyl-transferring) E1 component subunit alpha
gene1850	10.143	12.122	12.519	22.498	41.532	29.717	1.43027	up	0.0111437	0.0384217	Dbxref=GeneID:1063661; Name=ISP1_7; func=ISL3-like element ISP1 family transposase
gene1859	246.035	272.26	299.332	628.317	715.745	567.548	1.22527	up	0.0111975	0.0385129	Dbxref=GeneID:1063611; Name=ktrB; func=potassium uptake protein, TrkH family
gene1869	1475.04	1592.4	1689.8	3752.57	2855.16	4380.25	1.20773	up	0.0120466	0.0405887	Dbxref=GeneID:1063557; Name=lp_2190; func=MULTISPECIES: RNA-binding protein
gene1877	652.476	693.406	732.107	1857.59	1803.74	2837.88	1.64508	up	0.000662612	0.00394479	Dbxref=GeneID:1063536; Name=mraY; func=MULTISPECIES: phospho-N-acetylmuramoyl-pentapeptide-transferase
gene1879	378.501	538.055	471.883	1230.62	1376.45	801.835	1.29584	up	0.00774154	0.0288894	Dbxref=GeneID:1062214; Name=ftsL; func=MULTISPECIES: cell division protein FtsL
gene1880	349.628	361.496	381.817	1707.88	1526.37	1396.14	2.08292	up	1.96e-05	0.000201312	Dbxref=GeneID:1063486; Name=mraW; func=MULTISPECIES: 16S rRNA (cytosine(1402)-N(4))-methyltransferase RsmH
gene1881	526.266	566.054	617.487	2144.49	2310.09	1690.73	1.84565	up	0.000152221	0.00112167	Dbxref=GeneID:1063547; Name=mraZ; func=protein MraZ
gene1887	44.601	40.639	46.85	99.98	119.101	91.469	1.23329	up	0.0142778	0.0465438	Dbxref=GeneID:1062898; Name=brnT; func=MULTISPECIES: branched-chain amino acid transport system II carrier protein
gene1888	137.847	86.55	132.815	294.124	265.409	346.355	1.34254	up	0.00655526	0.0250276	Dbxref=GeneID:1063815; Name=rrmA; func=MULTISPECIES: methyltransferase domain-containing protein
gene1892	1969.35	1845	2065.95	668.597	627.179	715.697	-1.54764	down	0.000775603	0.00445694	Dbxref=GeneID:1061488; Name=lp_2219; func=MULTISPECIES: lactonase family protein
gene1897	12373.7	10307.2	11178.5	5385.97	6370.4	3867.76	-1.11578	down	0.0132675	0.0438008	Dbxref=GeneID:1063712; Name=lp_2224; func=DsbA family protein
gene1905	190.431	189.656	213.672	614.387	739.67	273.887	1.4551	up	0.0111437	0.0384217	Dbxref=GeneID:1061520; Name=lp_tRNA42; func=_
gene1906	263.236	227.209	295.362	1226.14	1280.91	467.874	1.9206	up	0.00039741	0.002591	Dbxref=GeneID:1062512; Name=lp_tRNA43; func=_
gene1907	378.501	275.471	392.026	1662.95	1762.32	537.4	1.92159	up	0.000222804	0.00156129	Dbxref=GeneID:1064068; Name=lp_tRNA44; func=_
gene1908	529.513	408.277	574.972	2273.23	2463.1	745.65	1.85751	up	0.000288923	0.00197057	Dbxref=GeneID:1064131; Name=lp_tRNA45; func=_
gene1909	577.389	485.189	647.855	2721.47	3180.06	1083.69	2.02994	up	7.06e-05	0.000593622	Dbxref=GeneID:1064069; Name=lp_tRNA46; func=_
gene1910	526.472	384.508	531.652	2316.05	2749.28	951.172	2.06022	up	6.56e-05	0.000562382	Dbxref=GeneID:1064067; Name=lp_tRNA47; func=_
gene1911	341.622	204.139	249.154	966.123	1109.92	615.537	1.75957	up	0.00114343	0.00616705	Dbxref=GeneID:1061838; Name=lp_tRNA48; func=_
gene1912	346.238	275.863	291.371	1785.56	1602.62	730.366	2.1727	up	4.66e-05	0.000429197	Dbxref=GeneID:1062017; Name=lp_tRNA49; func=_
gene1913	782.883	737.168	718.715	5509.43	5207.48	1747.36	2.47702	up	9.44e-07	1.42e-05	Dbxref=GeneID:1062199; Name=lp_tRNA50; func=_
gene1914	1506.14	1258.62	1534.55	9023.8	10031.8	4295.98	2.44134	up	1e-06	1.49e-05	Dbxref=GeneID:1061877; Name=lp_tRNA51; func=_
gene1915	1038.71	724.141	990.661	4972.69	6086.87	2525.85	2.30271	up	4.74e-06	5.86e-05	Dbxref=GeneID:1061881; Name=lp_tRNA52; func=_
gene1916	242.367	206.897	233.097	921.58	1386.88	481.839	2.03181	up	0.000194111	0.00138792	Dbxref=GeneID:1064217; Name=lp_tRNA53; func=_
gene1917	519.357	500.002	543.892	1785.56	2172.78	659.359	1.56262	up	0.00228191	0.0107768	Dbxref=GeneID:1061734; Name=lp_tRNA54; func=_
gene1918	1355.56	1231.36	1303.71	3535.4	3845.28	1566.77	1.20147	up	0.0146542	0.0474953	Dbxref=GeneID:1061833; Name=lp_tRNA55; func=_
gene1919	1494.59	1364.47	1397.5	3847.92	4117.84	2006.96	1.2283	up	0.013075	0.0432754	Dbxref=GeneID:1063468; Name=lp_tRNA56; func=_
gene1920	1000.3	1031.18	1063.3	4009.29	4748.75	1979.46	1.79475	up	0.000314829	0.00211644	Dbxref=GeneID:1061448; Name=lp_tRNA57; func=_
gene1921	263.236	262.164	413.507	1634.86	2358.75	637.542	2.30231	up	1.56e-05	0.000164329	Dbxref=GeneID:1061501; Name=lp_tRNA58; func=_
gene1931	220.338	205.848	227.538	1105.04	909.483	960.312	2.18605	up	9.51e-06	0.000108223	Dbxref=GeneID:1061373; Name=lp_2232; func=MULTISPECIES: membrane protein
gene1932	393.104	391.504	387.345	1341.1	1250.45	1118.97	1.6627	up	0.00063055	0.00377792	Dbxref=GeneID:1061326; Name=lp_2234; func=TIGR01906 family membrane protein
gene1933	601.72	637.933	736.864	2111.42	1963.89	1396.58	1.46908	up	0.00229316	0.0108117	Dbxref=GeneID:1061430; Name=lp_2235; func=MULTISPECIES: TIGR01457 family HAD-type hydrolase
gene1934	746.28	743.243	789.445	2004.86	1911.4	1363.69	1.21214	up	0.0119562	0.0404783	Dbxref=GeneID:1061289; Name=lp_2236; func=MULTISPECIES: DUF1027 domain-containing protein
gene1937	184.86	228.294	247.868	892.85	942.866	628.253	1.89821	up	9.59e-05	0.000767729	Dbxref=GeneID:1061525; Name=lp_2240; func=amino acid permease
gene1965	2212.78	2388.49	2255.36	6745.06	7168.31	4745.3	1.44427	up	0.00271187	0.0122514	Dbxref=GeneID:1062274; Name=lp_2273; func=MULTISPECIES: DUF1292 domain-containing protein
gene1966	4181.92	4115.04	4166.89	11617.6	11914.4	6640.27	1.27548	up	0.00787241	0.0292499	Dbxref=GeneID:1062270; Name=lp_2274; func=MULTISPECIES: Holliday junction resolvase RuvX
gene1967	2258.5	2362.72	2113.55	6035.64	6001.49	3925.64	1.24501	up	0.00977401	0.0345906	Dbxref=GeneID:1062277; Name=lp_2275; func=hypothetical protein FC76_GL001586
gene1968	323.784	377.016	338.283	1204.13	866.785	1150.83	1.63253	up	0.000712426	0.00416199	Dbxref=GeneID:1062264; Name=alaS; func=alanine--tRNA ligase
gene1978	237.933	269.391	262.756	730.06	720.459	593.993	1.40867	up	0.00342179	0.0149305	Dbxref=GeneID:1062283; Name=lp_2290; func=membrane protein
gene1988	362.087	362.574	447.127	1237.44	1053.62	809.461	1.4038	up	0.00355601	0.0153729	Dbxref=GeneID:1062301; Name=lp_2305; func=MULTISPECIES: insulinase family protein
gene2008	5050.7	5160.03	6004.63	15917.7	12914.3	11812.6	1.32571	up	0.005694	0.0225037	Dbxref=GeneID:1062335; Name=rpsD; func=MULTISPECIES: 30S ribosomal protein S4
gene2015	647.283	725.23	716.193	1645.1	1696.48	1530.28	1.22186	up	0.0120867	0.0406749	Dbxref=GeneID:1062360; Name=lp_2339; func=MULTISPECIES: hypothetical protein
gene2017	111.004	98.144	109.301	487.408	394.224	673.664	2.28804	up	4.03e-06	5.07e-05	Dbxref=GeneID:1062351; Name=bla2; func=serine hydrolase
gene2020	2729.06	2695.03	2690.18	8102.09	7165.71	5953.64	1.38699	up	0.00386444	0.0164512	Dbxref=GeneID:1062361; Name=ddl; func=D-ala D-ala ligase N-terminal domain protein
gene2034	4407.64	4636.54	4821.59	15880.2	12336.2	17381.4	1.71744	up	0.000370008	0.0024236	Dbxref=GeneID:1062398; Name=atpC; func=MULTISPECIES: F0F1 ATP synthase subunit epsilon
gene2035	6814.18	7785.15	7688.81	22604.8	18810.5	27705	1.63283	up	0.000694272	0.00408995	Dbxref=GeneID:1062389; Name=atpD; func=MULTISPECIES: ATP synthase subunit beta
gene2036	5768.25	6066.11	6142.16	19045.8	15457.7	22189.2	1.65705	up	0.000581394	0.00353618	Dbxref=GeneID:1062408; Name=atpG; func=MULTISPECIES: ATP synthase subunit gamma
gene2037	5472.71	5878.25	5918.6	19424.7	16162.5	19965.7	1.68563	up	0.000465637	0.00297373	Dbxref=GeneID:1062411; Name=atpA; func=F0F1 ATP synthase subunit alpha
gene2038	6499.26	7300.02	7358.27	22274.3	18882.2	23301.2	1.60718	up	0.000837702	0.00472679	Dbxref=GeneID:1062400; Name=atpH; func=MULTISPECIES: ATP synthase subunit delta
gene2039	4791.64	5815.58	5866.72	18277.3	14950.2	17342.9	1.61811	up	0.000770154	0.0044347	Dbxref=GeneID:1062399; Name=atpF; func=MULTISPECIES: ATP synthase F0F1 subunit B
gene2040	2904.99	3803.64	3097.56	11119.4	9449.17	13469.5	1.79538	up	0.000208545	0.00147239	Dbxref=GeneID:1062422; Name=atpE; func=MULTISPECIES: F0F1 ATP synthase subunit C
gene2041	6130.89	6354.32	6287.24	19001.3	16937.2	21838.9	1.62189	up	0.000756846	0.00438503	Dbxref=GeneID:1062416; Name=atpB; func=MULTISPECIES: F0F1 ATP synthase subunit A
gene2042	1587.1	1974.06	1839.15	481.353	501.173	275.709	-2.10164	down	8.48e-06	9.93e-05	Dbxref=GeneID:1062423; Name=pyrP; func=MULTISPECIES: uracil transporter
gene2052	3616.47	3600.43	4039.98	1191.33	1424.82	1877.8	-1.32475	down	0.00358748	0.0154851	Dbxref=GeneID:1062438; Name=pmi; func=mannose-6-phosphate isomerase, class I
gene2090	144.191	190.552	180.456	9.226	2.468	19.498	-4.04575	down	2.08e-11	7.49e-10	Dbxref=GeneID:1062501; Name=lp_2426; func=transcriptional regulator
gene2097	131.134	160.739	196.185	7.458	2.993	10.836	-4.51881	down	4.79e-12	1.87e-10	Dbxref=GeneID:1062533; Name=lp_2433; func=endodeoxyribonuclease
gene2098	64.177	78.666	72.01	0	0	5.062	-5.40666	down	1.32e-11	4.9e-10	Dbxref=GeneID:1062527; Name=lp_2434; func=hypothetical protein
gene2099	733.425	1016.37	890.611	16.054	15.033	63.615	-4.80118	down	7.65e-18	5.97e-16	Dbxref=GeneID:1062532; Name=lp_2435; func=MULTISPECIES: hypothetical protein
gene2100	111.205	168.344	219.607	14.8	7.919	11.729	-3.85688	down	1.88e-09	4.98e-08	Dbxref=GeneID:1062525; Name=lp_2436; func=hypothetical protein
gene2101	267.219	277.873	279.255	4.358	1.166	18.037	-5.1286	down	3.14e-18	2.52e-16	Dbxref=GeneID:1062539; Name=lp_2437; func=DnaD domain protein
gene2109	540.064	692.137	605.975	9.286	26.086	35.57	-4.69543	down	1.15e-15	7.04e-14	Dbxref=GeneID:1062545; Name=lp_2445; func=DUF771 domain-containing protein
gene2110	272.57	343.851	316.031	0	0	23.957	-5.28233	down	9.99e-13	4.07e-11	Dbxref=GeneID:1062552; Name=lp_2446; func=hypothetical protein
gene2146	47.447	21.002	56.196	17.54	16.424	10.812	-1.47697	down	0.0130348	0.043193	Dbxref=GeneID:1062658; Name=lp_2484; func=transcription regulator
gene2147	32.4	29.041	31.991	13.654	13.843	11.96	-1.24357	down	0.0122476	0.0411178	Dbxref=GeneID:1062647; Name=lp_2485; func=MULTISPECIES: hypothetical protein
gene2159	123.399	92.173	100.201	35.114	26.015	37.818	-1.67413	down	0.000492578	0.00309113	Dbxref=GeneID:1062668; Name=tagE4; func=glycosyltransferase
gene2160	63.572	55.639	67.728	8.546	6.859	21.635	-2.33532	down	3.87e-06	4.92e-05	Dbxref=GeneID:1062660; Name=lp_2499; func=ATP-binding cassette domain-containing protein
gene2161	21857.9	22794	22137.3	6600.85	6890.83	7628.88	-1.66097	down	0.000316764	0.00212436	Dbxref=GeneID:1062659; Name=pgi; func=MULTISPECIES: glucose-6-phosphate isomerase
gene2162	185.145	156.138	157.481	572.944	544.911	490.375	1.68904	up	0.000570514	0.00350031	Dbxref=GeneID:1062677; Name=lp_2503; func=MULTISPECIES: glucose transporter GlcU
gene2168	39.565	51.633	55.109	450.894	399.539	209.847	2.85735	up	3.13e-08	6.29e-07	Dbxref=GeneID:1062680; Name=lp_2509; func=MULTISPECIES: EamA family transporter
gene2171	2223.76	1893.74	1970.82	629.964	767.389	546.467	-1.64715	down	0.00040762	0.00264537	Dbxref=GeneID:1062692; Name=lp_2513; func=hypothetical protein HMPREF0531_11788
gene2174	1583.88	1515.58	1533.26	6303.05	6572.42	4647.23	1.91929	up	8.38e-05	0.000686411	Dbxref=GeneID:1062688; Name=lp_2516; func=MULTISPECIES: hypothetical protein
gene2180	86.051	80.344	86.897	237.391	226.916	198.221	1.38717	up	0.00493426	0.0200946	Dbxref=GeneID:1062715; Name=lp_2524; func=MULTISPECIES: GGDEF domain-containing protein
gene2189	43.798	28.749	30.156	4.416	7.974	18.081	-1.75287	down	0.00124599	0.00659364	Dbxref=GeneID:1062731; Name=oahS; func=O-acetylhomoserine aminocarboxypropyltransferase/cysteine synthase
gene2190	16.087	18.934	14.768	1.622	2.603	8.141	-2.00919	down	0.0032913	0.0145189	Dbxref=GeneID:1062733; Name=metA; func=MULTISPECIES: homoserine O-succinyltransferase
gene2193	155.431	172.723	214.788	473.59	413.604	442.436	1.29215	up	0.00815563	0.0299573	Dbxref=GeneID:1062741; Name=lp_2543; func=ATP-binding cassette domain-containing protein
gene2209	55.029	72.343	62.98	231.912	247.854	147.358	1.72007	up	0.000559933	0.00346567	Dbxref=GeneID:1062760; Name=lp_2564; func=VanZ family protein
gene2210	174.757	158.606	189.76	879.97	851.794	663.945	2.19522	up	8.53e-06	9.94e-05	Dbxref=GeneID:1062780; Name=lp_2565; func=MULTISPECIES: magnesium transporter CorA family protein
gene2211	3.681	0	0	16.331	19.661	12.942	3.73158	up	0.00671687	0.0255405	Dbxref=GeneID:1062781; Name=lp_2566; func=MULTISPECIES: DUF1801 domain-containing protein
gene2223	158.528	152.905	156.242	386.475	434.137	319.677	1.28582	up	0.00798619	0.0295668	Dbxref=GeneID:1062804; Name=glpQ4; func=MULTISPECIES: glycerophosphoryl diester phosphodiesterase
gene2225	934.436	965.656	905.674	297.154	393.524	235.99	-1.59827	down	0.000576811	0.00351592	Dbxref=GeneID:1062813; Name=lp_2586; func=hypothetical protein HMPREF0531_11355
gene2246	2060.65	2091.83	2041	315.726	536.277	1198.72	-1.59462	down	0.000532895	0.00331291	Dbxref=GeneID:1062850; Name=lp_2613; func=MULTISPECIES: ABC transporter permease
gene2247	3248.65	2984.2	3050.75	357.69	553.322	1304.41	-2.0671	down	1.08e-05	0.000119667	Dbxref=GeneID:1062862; Name=lp_2614; func=MULTISPECIES: ABC transporter ATP-binding protein
gene2248	3222.41	3114.42	3158.66	331.513	371.337	1036.48	-2.44871	down	3.43e-07	5.73e-06	Dbxref=GeneID:1062847; Name=lp_2615; func=MULTISPECIES: GntR family transcriptional regulator
gene2250	10.143	12.122	13.657	23.623	43.338	30.014	1.43267	up	0.0105945	0.0369363	Dbxref=GeneID:1062866; Name=ISP1_8; func=ISL3-like element ISP1 family transposase
gene2252	1648.32	1639.49	1713.73	607.773	661.388	648.691	-1.38288	down	0.00245534	0.0113034	Dbxref=GeneID:1062863; Name=pepF2; func=oligoendopeptidase F
gene2264	5.054	2.517	0	42.035	56.229	23.689	4.00916	up	3e-06	3.92e-05	Dbxref=GeneID:1062874; Name=lp_2638; func=MULTISPECIES: DUF2798 domain-containing protein
gene2274	5279.61	4819.02	5404.36	2241.86	2507.73	1814.89	-1.23979	down	0.00633182	0.02443	Dbxref=GeneID:1062907; Name=lp_2652; func=universal stress protein
gene2275	402.909	322.146	377.265	140.031	164.166	165.427	-1.23096	down	0.00755361	0.0282256	Dbxref=GeneID:1062908; Name=rluA; func=RluA family pseudouridine synthase
gene2277	1063.21	971.004	1013.29	2824.62	2353.38	2823.57	1.39265	up	0.00380297	0.0162406	Dbxref=GeneID:1062912; Name=lp_2658; func=glycosyltransferase
gene2279	108.643	132.245	113.437	207.509	220.275	389.474	1.20571	up	0.0146036	0.0474407	Dbxref=GeneID:1062899; Name=xynC; func=MULTISPECIES: alpha-xylosidase
gene2303	5615.2	5369.77	5825.84	1989.52	2195.39	1538.72	-1.55439	down	0.000732131	0.00425939	Dbxref=GeneID:1062954; Name=lp_2690; func=MULTISPECIES: SDR family oxidoreductase
gene2308	3668.82	5083.5	4368.52	1692.03	1408.01	464.607	-1.88003	down	5.85e-05	0.000514041	Dbxref=GeneID:1062963; Name=pyrE; func=MULTISPECIES: orotate phosphoribosyltransferase
gene2309	3671	5167.8	4213.64	1518.27	1143.52	396.88	-2.09334	down	9.2e-06	0.000105487	Dbxref=GeneID:1062962; Name=pyrF; func=MULTISPECIES: orotidine-5'-phosphate decarboxylase
gene2310	3135.72	4487.77	3668.73	1211.83	1086.91	408.035	-2.06068	down	1.22e-05	0.000132601	Dbxref=GeneID:1062981; Name=pyrD; func=MULTISPECIES: dihydroorotate dehydrogenase
gene2311	3844.86	5211.1	4292.38	1111.3	926.761	372.728	-2.46908	down	2.52e-07	4.35e-06	Dbxref=GeneID:1062982; Name=pyrAB; func=carbamoyl-phosphate synthase large subunit
gene2312	3447.8	4723.62	4073.37	718.818	595.677	209.429	-3.0063	down	9.44e-10	2.68e-08	Dbxref=GeneID:1062973; Name=pyrAA; func=MULTISPECIES: carbamoyl-phosphate synthase small subunit
gene2313	3205.18	4254.86	3816.47	657.092	507.987	150.073	-3.10002	down	3.36e-10	1.03e-08	Dbxref=GeneID:1062984; Name=pyrC; func=MULTISPECIES: dihydroorotase
gene2314	3004.24	4063.42	3519.86	428.052	302.137	121.099	-3.63657	down	7.87e-13	3.35e-11	Dbxref=GeneID:1062971; Name=pyrB; func=MULTISPECIES: aspartate carbamoyltransferase
gene2315	3300.61	4039.07	3346.06	463.124	501.911	298.603	-3.08003	down	4.7e-10	1.42e-08	Dbxref=GeneID:1062970; Name=pyrR1; func=MULTISPECIES: bifunctional pyr operon transcriptional regulator/uracil phosphoribosyltransferase PyrR
gene2317	831.126	426.24	630.282	104.889	114.798	133.786	-2.41691	down	5.09e-07	8.18e-06	Dbxref=GeneID:1062988; Name=lp_2710; func=MULTISPECIES: purine permease
gene2321	37.025	27.041	33.235	134.138	92.281	95.459	1.72596	up	0.00164493	0.00823929	Dbxref=GeneID:1063012; Name=lp_2715; func=MULTISPECIES: hypothetical protein
gene2322	20.243	11.52	14.061	138.977	94.384	104.493	2.88214	up	8.76e-08	1.63e-06	Dbxref=GeneID:1063019; Name=ica3; func=MULTISPECIES: glycosyltransferase
gene2323	1593.21	1180.51	1473.96	97.691	98.862	127.914	-3.71052	down	5.16e-13	2.27e-11	Dbxref=GeneID:1063009; Name=lp_2718; func=methionine synthase
gene2324	14073.3	10077.5	11904.5	485.029	467.331	362.635	-4.77708	down	3.93e-19	3.56e-17	Dbxref=GeneID:1063006; Name=purD; func=phosphoribosylamine--glycine ligase
gene2325	20541.6	15251.3	17782.7	620.949	554.914	506.312	-4.99317	down	2.31e-20	2.44e-18	Dbxref=GeneID:1063024; Name=purH; func=Bifunctional purine biosynthesis protein PurH
gene2326	17260.3	12635.3	14545.6	493.22	356.475	354.584	-5.20565	down	1.87e-21	2.5e-19	Dbxref=GeneID:1063020; Name=purN; func=phosphoribosylglycinamide formyltransferase
gene2327	15008.4	10820	13023.7	394.658	328.983	281.313	-5.27279	down	6.07e-22	8.53e-20	Dbxref=GeneID:1063027; Name=purM; func=phosphoribosylformylglycinamidine cyclo-ligase
gene2328	17894.6	12904.2	15417.5	404.26	324.464	296.392	-5.49454	down	3.14e-23	5.52e-21	Dbxref=GeneID:1063018; Name=purF; func=MULTISPECIES: amidophosphoribosyltransferase
gene2329	15569.2	11738.5	13722.3	250.875	239.366	238.384	-5.81535	down	4.24e-25	1.32e-22	Dbxref=GeneID:1063017; Name=purL; func=phosphoribosylformylglycinamidine synthase subunit PurL
gene2330	13407.1	9901.55	11864.6	216.975	177.496	152.115	-6.00788	down	5.42e-26	2.17e-23	Dbxref=GeneID:1063032; Name=purQ; func=MULTISPECIES: phosphoribosylformylglycinamidine synthase subunit PurQ
gene2331	12584.7	9446.42	10901.9	289.725	241.481	178.096	-5.53699	down	5.16e-23	8.52e-21	Dbxref=GeneID:1063028; Name=purS; func=MULTISPECIES: phosphoribosylformylglycinamidine synthase subunit PurS
gene2332	13138.1	9816.51	11458.2	260.086	285.081	151.772	-5.62576	down	8.02e-24	1.73e-21	Dbxref=GeneID:1063033; Name=purC; func=MULTISPECIES: phosphoribosylaminoimidazolesuccinocarboxamide synthase
gene2333	14190.4	10616.4	12953.4	306.514	309.531	154.976	-5.61395	down	7.97e-24	1.73e-21	Dbxref=GeneID:1063026; Name=purK1; func=5-(carboxyamino)imidazole ribonucleotide synthase
gene2334	24008.4	16339.5	21197.6	534.981	600.665	189.98	-5.53691	down	2.42e-23	4.86e-21	Dbxref=GeneID:1063025; Name=purE; func=MULTISPECIES: 5-(carboxyamino)imidazole ribonucleotide mutase
gene2335	1937.44	1725.77	1771.28	487.841	734.7	1147.41	-1.19728	down	0.00801226	0.0296162	Dbxref=GeneID:1063042; Name=lp_2732; func=NADPH-dependent oxidoreductase
gene2336	1815.39	1854.09	1531.84	487.587	685.318	1220.89	-1.11958	down	0.013021	0.043193	Dbxref=GeneID:1063043; Name=lp_2733; func=MULTISPECIES: NAD(P)H-dependent oxidoreductase
gene2342	21.942	31.939	30.302	87.979	66.106	79.615	1.47302	up	0.00635235	0.0244522	Dbxref=GeneID:1063051; Name=lp_2739; func=MULTISPECIES: ABC transporter ATP-binding protein
gene2347	117.037	126.012	125.997	370.102	322.388	282.19	1.40112	up	0.00443501	0.0185945	Dbxref=GeneID:1063053; Name=lp_2744; func=MULTISPECIES: ABC transporter permease
gene2349	122.008	192.393	256.684	45.104	18.1	40.214	-2.46518	down	1.19e-05	0.000131131	Dbxref=GeneID:11933313; Name=lp_2746; func=MULTISPECIES: hypothetical protein
gene2351	248.649	215.336	278.995	53.953	69.767	120.358	-1.60597	down	0.000937938	0.00519844	Dbxref=GeneID:1063065; Name=lp_2748; func=MULTISPECIES: hypothetical protein
gene2357	389.152	409.017	414.98	40.358	29.748	103.569	-2.80427	down	1.15e-08	2.56e-07	Dbxref=GeneID:1063082; Name=lp_2757; func=alpha-glycosidase
gene2366	1397.22	1345.97	1212.34	104.086	144.107	314.148	-2.81435	down	8.12e-09	1.84e-07	Dbxref=GeneID:1063097; Name=lp_2766; func=MULTISPECIES: DUF871 domain-containing protein
gene2367	1649.58	1499.31	1618.63	141.836	225.75	292.45	-2.85262	down	5.3e-09	1.28e-07	Dbxref=GeneID:1063089; Name=lp_2767; func=GNAT family N-acetyltransferase
gene2368	6.872	7.821	18.725	45.726	28.836	90.596	2.30505	up	2.67e-05	0.000263863	Dbxref=GeneID:1063088; Name=lp_2768; func=MFS transporter
gene2370	476.162	554.299	543.296	29.723	27.832	157.302	-2.87275	down	5.54e-09	1.32e-07	Dbxref=GeneID:1063101; Name=nadC2; func=nicotinate phosphoribosyltransferase
gene2372	98.308	91.789	91.922	32.935	26.434	41.403	-1.48467	down	0.00210297	0.0101361	Dbxref=GeneID:1063099; Name=lp_2773; func=ABC transporter permease
gene2373	80.929	49.731	52.165	9.548	13.794	16.648	-2.19267	down	5.93e-05	0.000519319	Dbxref=GeneID:1063098; Name=lp_2774; func=MULTISPECIES: ABC transporter ATP-binding protein
gene2374	2842.61	2674.36	2776.18	191.82	252.246	373.609	-3.34232	down	1.99e-11	7.28e-10	Dbxref=GeneID:1063115; Name=dsdA; func=D-serine dehydratase
gene2375	1413.36	1353.67	1267.09	224.487	195.191	438.532	-2.23285	down	2.44e-06	3.22e-05	Dbxref=GeneID:1063110; Name=pbg4; func=MULTISPECIES: 6-phospho-beta-glucosidase
gene2376	1527.51	1577.11	1440.42	168.716	223.314	461.6	-2.41261	down	4.31e-07	7.04e-06	Dbxref=GeneID:1063116; Name=pbg5; func=glycosyl hydrolase family protein
gene2377	7355.17	7930.17	7211.93	587.904	819.199	1651.22	-2.87893	down	3.53e-09	9.17e-08	Dbxref=GeneID:1063108; Name=pts20A; func=MULTISPECIES: PTS lactose/cellobiose transporter subunit IIA
gene2378	10897.2	10363.4	10920.8	911.437	1273	1933.29	-2.96631	down	1.36e-09	3.75e-08	Dbxref=GeneID:1063106; Name=pts20B; func=cellobiose PTS, EIIB
gene2379	204.466	277.519	182.724	36.121	75.7	106.555	-1.6059	down	0.000793791	0.00452445	Dbxref=GeneID:1063123; Name=gntR; func=MULTISPECIES: GntR family transcriptional regulator
gene2383	328.719	325.851	299.895	64.735	61.528	121.959	-1.94305	down	5.08e-05	0.00045865	Dbxref=GeneID:1063132; Name=lp_2787; func=MULTISPECIES: Cof-type HAD-IIB family hydrolase
gene2390	98.545	101.006	88.457	48.725	49.341	31.758	-1.14953	down	0.012538	0.0418778	Dbxref=GeneID:1063145; Name=lp_2795; func=DUF5011 domain-containing protein
gene2391	61.65	65.083	67.79	19.144	21.95	12.643	-1.85589	down	0.000114762	0.000895782	Dbxref=GeneID:1063134; Name=lp_2796; func=BspA family leucine-rich repeat surface protein
gene2395	2967.76	2614.13	2863.76	367.535	485.776	423.632	-2.72551	down	1.9e-08	4.04e-07	Dbxref=GeneID:1063146; Name=lp_2800a; func=MarR family transcriptional regulator
gene2396	4947.33	4339.63	4778.82	585.756	750.214	650.238	-2.8241	down	7.17e-09	1.64e-07	Dbxref=GeneID:17494183; Name=lp_2800b; func=transcriptional regulator, MarR family
gene2399	5921.44	5395.5	5698.61	2120.1	2613.88	2454.64	-1.24307	down	0.00606914	0.0236536	Dbxref=GeneID:1063143; Name=lp_2804; func=LysR family transcriptional regulator
gene2405	745.004	871.893	887.387	388.818	354.707	416.234	-1.11057	down	0.0141383	0.0462574	Dbxref=GeneID:1063161; Name=tyrS; func=MULTISPECIES: tyrosine--tRNA ligase
gene2406	240.443	258.622	295.687	1322.64	1335.52	1678.27	2.44792	up	7.93e-07	1.23e-05	Dbxref=GeneID:1063174; Name=lp_2809; func=MULTISPECIES: hypothetical protein
gene2407	58.186	60.896	88.525	652.963	629.417	542.043	3.13549	up	8.81e-10	2.53e-08	Dbxref=GeneID:1063170; Name=lp_2810; func=glycosyl hydrolase
gene2409	373.649	539.206	404.99	157.863	167.429	170.536	-1.41026	down	0.00264843	0.0120034	Dbxref=GeneID:1063168; Name=lp_2813; func=MULTISPECIES: DUF1694 domain-containing protein
gene2414	3128.99	3252.95	3436.71	1406.67	1463.87	1248.86	-1.25309	down	0.00587723	0.0230642	Dbxref=GeneID:1063175; Name=lp_2820; func=MULTISPECIES: DUF1440 domain-containing protein
gene2415	0	3.584	1.346	27.936	17.084	23.897	3.80439	up	8.83e-07	1.33e-05	Dbxref=GeneID:1063190; Name=lp_2822; func=FtsX-like permease family protein
gene2416	18.812	18.735	35.883	206.544	224.381	197.309	3.09681	up	1.39e-08	3e-07	Dbxref=GeneID:1063191; Name=lp_2823; func=MULTISPECIES: ABC transporter ATP-binding protein
gene2417	294.741	342.08	302.068	738.697	681.716	722.097	1.19027	up	0.0149283	0.0482167	Dbxref=GeneID:1063186; Name=lp_2824; func=MULTISPECIES: ECF transporter S component
gene2420	339.207	342.199	411.398	779.171	901.902	1005.38	1.29766	up	0.00719138	0.0269797	Dbxref=GeneID:1063183; Name=napA3; func=cation:proton antiporter
gene2427	23.013	10.187	14.346	70.897	91.044	65.177	2.25597	up	0.000182839	0.00131738	Dbxref=GeneID:1063206; Name=lp_2839; func=MULTISPECIES: DUF4811 domain-containing protein
gene2433	23.046	39.154	41.069	6183.73	6254.29	1245.13	7.04981	up	5.37e-31	5.03e-28	Dbxref=GeneID:1063209; Name=lp_2845; func=LysM domain-containing protein
gene2435	89.497	99.319	103.288	311.945	302.721	240.479	1.54968	up	0.0022171	0.010576	Dbxref=GeneID:1063207; Name=ogt; func=MULTISPECIES: methylated-DNA--[protein]-cysteine S-methyltransferase
gene2436	123.838	121.916	97.426	415.18	397.847	356.144	1.76844	up	0.000339156	0.00225169	Dbxref=GeneID:1063221; Name=lp_2849; func=ATP-binding cassette domain-containing protein
gene2437	163.028	229.405	181.744	589.071	516.798	602.434	1.57299	up	0.00121851	0.00647262	Dbxref=GeneID:1063217; Name=lp_2850; func=MULTISPECIES: ABC transporter permease
gene2438	580.275	559.049	608.589	171.867	199.25	191.699	-1.63489	down	0.000476165	0.00300679	Dbxref=GeneID:1063222; Name=lp_2851; func=MULTISPECIES: SDR family oxidoreductase
gene2439	562.718	663.769	756.777	146.06	95.915	148.494	-2.34459	down	2.09e-06	2.81e-05	Dbxref=GeneID:1063215; Name=cmd; func=MULTISPECIES: carboxymuconolactone decarboxylase family protein
gene2440	285.755	230.232	317.027	64.095	54.301	60.203	-2.2216	down	1.22e-05	0.000132601	Dbxref=GeneID:1063230; Name=lp_2853; func=MULTISPECIES: cupin domain-containing protein
gene2441	3981.66	3299.66	3955.41	1179.08	1643.64	1286.47	-1.4513	down	0.00155487	0.00787242	Dbxref=GeneID:1063226; Name=lp_2854; func=MULTISPECIES: MerR family transcriptional regulator
gene2442	228.221	204.058	231.036	57.371	52.366	93.015	-1.70996	down	0.000311449	0.00210188	Dbxref=GeneID:1063233; Name=dapE2; func=MULTISPECIES: M20/M25/M40 family metallo-hydrolase
gene2443	404.292	375.081	402.059	59.747	72.15	110.629	-2.28431	down	1.7e-06	2.34e-05	Dbxref=GeneID:1063224; Name=lp_2856; func=ABC transporter permease
gene2444	215.095	289.827	251.994	42.097	11.262	53.751	-2.82101	down	1.09e-07	1.99e-06	Dbxref=GeneID:1063223; Name=lp_2857; func=ABC transporter ATP-binding protein
gene2445	32.432	26.917	30.326	5.995	0	4.751	-3.06055	down	0.00223741	0.0106201	Dbxref=GeneID:1063239; Name=lp_2858; func=ATP-binding cassette domain-containing protein
gene2446	1574.29	1940.26	1636.15	659.097	627.091	681.47	-1.38829	down	0.00244486	0.0112994	Dbxref=GeneID:1063234; Name=nth1; func=endonuclease III
gene2454	70.169	91.846	134.97	342.408	274.82	243.17	1.5346	up	0.0021637	0.0103754	Dbxref=GeneID:1063241; Name=pgm8; func=MULTISPECIES: phosphoglycerate mutase family protein
gene2471	2611.96	2298.79	2615.03	945.799	1125.92	1093.15	-1.24969	down	0.00588592	0.0230642	Dbxref=GeneID:1063283; Name=lp_2890; func=aldo/keto reductase
gene2472	133.983	149.85	140.688	468.027	473.222	329.566	1.58184	up	0.00112802	0.00609564	Dbxref=GeneID:1063287; Name=lp_2893; func=ABC transporter ATP-binding protein
gene2490	205.658	231.846	270.82	687.418	580.968	802.121	1.5475	up	0.00145641	0.00745579	Dbxref=GeneID:1063330; Name=pepR2; func=alpha/beta fold hydrolase
gene2491	41.204	32.643	35.726	272.106	244.236	650.512	3.41262	up	6.99e-11	2.39e-09	Dbxref=GeneID:1063341; Name=lp_2920; func=amino acid permease
gene2492	188.424	188.677	180.397	67.007	70.188	103.808	-1.20991	down	0.00904161	0.0325313	Dbxref=GeneID:1063327; Name=lp_2921; func=MFS transporter
gene2493	262.126	234.479	272.727	76.113	78.906	95.787	-1.61702	down	0.000573873	0.00350644	Dbxref=GeneID:1063347; Name=npp; func=alkaline phosphatase family protein
gene2494	2090.43	1873.11	2072.25	379.556	580.454	806.208	-1.77288	down	0.000135422	0.00104543	Dbxref=GeneID:1063342; Name=lp_2923; func=alpha/beta hydrolase
gene2498	206.316	195.92	212.653	7.982	21.354	19.68	-3.64892	down	9.43e-11	3.15e-09	Dbxref=GeneID:1063355; Name=pts21A; func=MULTISPECIES: PTS sugar transporter subunit IIA
gene2506	2291.92	2239.43	2345.66	572.549	603.635	817.504	-1.78634	down	0.000121048	0.000942232	Dbxref=GeneID:1063363; Name=dus3; func=MULTISPECIES: tRNA-dihydrouridine synthase family protein
gene2507	154733	164181	147082	14638.2	31261	47365.2	-2.32092	down	9.73e-07	1.45e-05	Dbxref=GeneID:1063385; Name=lp_2939; func=hypothetical protein HMPREF0531_12153
gene2511	680.112	617.578	626.497	100.312	138.573	175.815	-2.2141	down	3.31e-06	4.29e-05	Dbxref=GeneID:1063372; Name=ubiD; func=3-octaprenyl-4-hydroxybenzoate carboxy-lyase
gene2512	7.957	5.283	15.872	97.071	90.502	51.546	3.03791	up	4.59e-08	8.96e-07	Dbxref=GeneID:1063403; Name=lp_2948; func=MULTISPECIES: zinc-ribbon domain-containing protein
gene2513	15.816	13.126	23.661	102.319	125.53	71.822	2.51009	up	3.69e-06	4.74e-05	Dbxref=GeneID:1063390; Name=lp_2949; func=MULTISPECIES: zinc ribbon domain-containing protein
gene2519	41.006	30.981	38.078	150.545	119.57	67.526	1.61711	up	0.00176719	0.00877352	Dbxref=GeneID:1063400; Name=lp_2959; func=EamA family transporter
gene2521	85.96	132.558	104.229	32.29	24.682	30.059	-1.89077	down	0.000147282	0.00110658	Dbxref=GeneID:1063420; Name=lp_2961; func=MULTISPECIES: amidohydrolase
gene2523	2511.43	2699.11	2666.12	637.705	948.389	724.642	-1.76923	down	0.00015551	0.00113798	Dbxref=GeneID:1063418; Name=lp_2964; func=MULTISPECIES: HxlR family transcriptional regulator
gene2524	373.649	382.185	362.595	30.399	55.218	76.08	-2.79009	down	2.28e-08	4.82e-07	Dbxref=GeneID:1063411; Name=lp_2965; func=ROK family protein
gene2528	167.322	135.758	144.25	35.824	35.078	36.34	-2.06044	down	1.82e-05	0.000189003	Dbxref=GeneID:1063438; Name=pts22CBA; func=Phosphotransferase system EIIABC component
gene2532	282.704	263.798	268.625	65.907	78.591	76.11	-1.88553	down	6.9e-05	0.000583767	Dbxref=GeneID:1063451; Name=lp_2975; func=cell surface protein
gene2533	98.284	91.133	83.66	18.793	18.1	10.922	-2.5137	down	1.72e-05	0.000179483	Dbxref=GeneID:1063437; Name=lp_2976; func=LPXTG cell wall anchor domain-containing protein
gene2534	80.988	74.548	100.51	14.97	16.384	18.694	-2.35495	down	5.67e-06	6.93e-05	Dbxref=GeneID:1063457; Name=lp_2977; func=DUF916 and DUF3324 domain-containing protein
gene2535	962.038	765.846	778.378	110.686	214.084	101.621	-2.55528	down	1.47e-07	2.62e-06	Dbxref=GeneID:1063459; Name=lp_2978; func=hypothetical protein HMPREF0531_12052
gene2538	42.703	37.622	62.657	14.572	11.696	28.871	-1.37464	down	0.0104452	0.0365515	Dbxref=GeneID:1063449; Name=livD; func=MULTISPECIES: ABC transporter ATP-binding protein
gene2543	353.457	328.126	337.374	1268.23	1326.82	637.728	1.66568	up	0.000608311	0.00366029	Dbxref=GeneID:1063460; Name=zmp3; func=peptidase M10
gene2545	38.127	49.364	47.059	99.369	118.784	164.764	1.50887	up	0.00350679	0.0151835	Dbxref=GeneID:1063475; Name=lp_2991; func=MULTISPECIES: XRE family transcriptional regulator
gene2546	296.748	286.73	307.698	47522.2	40527	22895.7	6.95991	up	2.12e-31	2.98e-28	Dbxref=GeneID:1063482; Name=mntH3; func=MULTISPECIES: divalent metal cation transporter
gene2547	418.131	392.802	475.816	46382.2	41553.2	29505.8	6.51206	up	1.41e-28	7.9e-26	Dbxref=GeneID:1063472; Name=lp_2993; func=MULTISPECIES: universal stress protein
gene2553	143.402	120.663	129.703	22.468	30.409	42.944	-2.0389	down	1.94e-05	0.000199873	Dbxref=GeneID:1063500; Name=lp_3001; func=LPXTG cell wall anchor domain-containing protein
gene2554	568.193	593.999	582.099	180.042	307.856	203.69	-1.33465	down	0.00435766	0.0183583	Dbxref=GeneID:1063496; Name=lp_3002; func=hypothetical protein
gene2559	297.744	288.728	263.748	17.379	31.385	42.468	-3.22018	down	4.63e-09	1.15e-07	Dbxref=GeneID:1063515; Name=pts23B; func=MULTISPECIES: PTS sugar transporter subunit IIB
gene2560	220.036	218.275	218.591	10.61	13.161	24.206	-3.77518	down	1.03e-12	4.12e-11	Dbxref=GeneID:1063503; Name=pts23C; func=PTS sugar transporter subunit IIC
gene2561	203.787	180.817	194.36	13.355	16.491	41.793	-3.0146	down	2.95e-09	7.75e-08	Dbxref=GeneID:1063502; Name=pbg6; func=glycoside hydrolase family 1 protein
gene2564	56.243	93.356	72.456	5486.71	5104.58	2278.82	5.85694	up	3.34e-24	8.53e-22	Dbxref=GeneID:1063529; Name=lp_3014; func=peptidoglycan-binding protein
gene2565	23.187	19.244	32.521	1718.64	1403.48	327.774	5.52438	up	3.32e-21	4.24e-19	Dbxref=GeneID:1063516; Name=lp_3015; func=peptidoglycan-binding protein
gene2569	26.842	29.163	35.593	132.605	132.495	140.837	2.14783	up	8.2e-05	0.000673747	Dbxref=GeneID:1063527; Name=lp_3019; func=membrane protein
gene2574	908.837	742.857	926.764	225.89	270.077	431.709	-1.47481	down	0.00138354	0.00713401	Dbxref=GeneID:1062625; Name=lp_3024; func=transcriptional regulator, LysR family
gene2576	8.609	32.583	21.252	47.741	81.233	42.376	1.45627	up	0.00941836	0.0335858	Dbxref=GeneID:1062761; Name=lp_3026; func=MULTISPECIES: SDR family oxidoreductase
gene2578	6.014	21.963	15.746	53.362	58.89	41.703	1.81597	up	0.00269106	0.0121769	Dbxref=GeneID:1062843; Name=lp_3029; func=MULTISPECIES: NAD-dependent epimerase/dehydratase family protein
gene2579	12.94	15.465	8.712	86.107	57.592	53.077	2.40631	up	0.000155265	0.00113798	Dbxref=GeneID:1062640; Name=lp_3030; func=MULTISPECIES: YbhB/YbcL family Raf kinase inhibitor-like protein
gene2580	37.404	24.834	10.492	96.792	80.461	52.966	1.66234	up	0.00645877	0.0247601	Dbxref=GeneID:1062803; Name=lp_3031; func=cupin domain protein
gene2581	28.951	10.812	16.242	72.242	96.638	89.061	2.20335	up	0.000367674	0.00241394	Dbxref=GeneID:1062928; Name=lp_3032; func=MULTISPECIES: hypothetical protein
gene2583	1113.39	1066.13	1137.69	378.439	477.305	333.053	-1.48047	down	0.00134541	0.0070141	Dbxref=GeneID:1062855; Name=lp_3034; func=short-chain dehydrogenase
gene2584	10.143	12.122	12.519	23.623	41.532	29.717	1.44748	up	0.0103722	0.0363869	Dbxref=GeneID:1062745; Name=ISP1_9; func=ISL3-like element ISP1 family transposase
gene2590	524.797	736.022	566.26	3460.23	3022.95	2832.01	2.35005	up	1.66e-06	2.34e-05	Dbxref=GeneID:1063238; Name=lp_3045; func=SDR family oxidoreductase
gene2594	0	3.222	0	78.932	69.111	38.86	5.85687	up	5.61e-09	1.32e-07	Dbxref=GeneID:1063259; Name=lp_3050; func=transglycosylase
gene2595	594.124	534.059	686.241	255.569	311.086	199.983	-1.24289	down	0.00653565	0.0249866	Dbxref=GeneID:1063293; Name=dhaT; func=MULTISPECIES: iron-containing alcohol dehydrogenase
gene2596	90.201	52.308	66.619	25.326	28.457	27.765	-1.35863	down	0.00580466	0.0228447	Dbxref=GeneID:1062974; Name=lp_3054; func=MULTISPECIES: NAD(P)-dependent alcohol dehydrogenase
gene2597	6.652	13.911	3.732	387.281	445.828	136.802	5.31895	up	5.7e-20	5.72e-18	Dbxref=GeneID:1062925; Name=copA; func=copper-translocating P-type ATPase
gene2598	14.234	23.627	10.648	573.57	654.631	198.784	4.87849	up	2.11e-14	1.14e-12	Dbxref=GeneID:1063268; Name=lp_3057; func=MULTISPECIES: cupredoxin domain-containing protein
gene2599	10.249	6.805	7.666	276.576	377.067	94.082	4.91859	up	1.66e-13	8.04e-12	Dbxref=GeneID:1063298; Name=lp_3058; func=MULTISPECIES: copper-binding protein
gene2602	2013.77	2001.1	1765.26	358.931	532.152	451.71	-2.10586	down	9.83e-06	0.000111374	Dbxref=GeneID:1063126; Name=lp_3062; func=MULTISPECIES: TfoX domain protein
gene2603	400.779	332.791	360.207	82.85	75.483	110.912	-2.02232	down	2.13e-05	0.0002172	Dbxref=GeneID:1063315; Name=hpk9; func=hypothetical protein HMPREF0531_12776
gene2611	220.876	223.643	221.673	108.871	98.304	42.063	-1.4184	down	0.00251693	0.0114815	Dbxref=GeneID:1063607; Name=lp_3072; func=MULTISPECIES: DUF916 and DUF3324 domain-containing protein
gene2612	193.529	146.651	195.906	86.319	93.623	43.141	-1.26487	down	0.00836021	0.0305093	Dbxref=GeneID:1063576; Name=lp_3073; func=MULTISPECIES: WxL domain-containing protein
gene2619	550.547	541.277	629.618	144.817	116.231	153.026	-2.05565	down	2.36e-05	0.000238134	Dbxref=GeneID:1063645; Name=lp_3081; func=transcription regulator (putative)
gene2621	2429.99	2112.27	2468.73	748.723	906.83	853.125	-1.48269	down	0.00125124	0.00660697	Dbxref=GeneID:1063606; Name=lp_3084; func=MULTISPECIES: murein L,D-transpeptidase
gene2627	2356.35	2125.05	2447.56	704.95	605.681	498.796	-1.9371	down	3.56e-05	0.000335783	Dbxref=GeneID:1063634; Name=lp_3091; func=MULTISPECIES: short-chain dehydrogenase
gene2628	9367.39	8621.36	9532	2687.7	2760.02	2468.45	-1.79765	down	0.000108259	0.000856922	Dbxref=GeneID:1063638; Name=gabD; func=MULTISPECIES: NAD-dependent succinate-semialdehyde dehydrogenase
gene2635	221.421	150.764	174.925	35.081	80.446	67.519	-1.57961	down	0.00121439	0.00646294	Dbxref=GeneID:1063644; Name=lp_3099; func=MULTISPECIES: DUF1211 domain-containing protein
gene2650	22.92	21.625	28.424	0	5.369	9.542	-2.29068	down	0.000138336	0.00105901	Dbxref=GeneID:1063786; Name=lp_3115; func=MULTISPECIES: DUF916 and DUF3324 domain-containing protein
gene2651	60.365	60.119	90.31	22.316	23.881	36.681	-1.34674	down	0.0105945	0.0369363	Dbxref=GeneID:1063825; Name=lp_3116; func=MULTISPECIES: WxL domain-containing protein
gene2652	51.175	53.232	54.231	8.198	11.135	19.824	-2.01831	down	5.23e-05	0.000466888	Dbxref=GeneID:1063793; Name=lp_3117; func=BspA family leucine-rich repeat surface protein
gene2654	47.288	33.538	31.353	113.63	96.303	89.843	1.41806	up	0.00463113	0.0192223	Dbxref=GeneID:1063821; Name=lepA2; func=MULTISPECIES: elongation factor 4
gene2658	25.068	22.384	25.218	389.226	330.094	115.739	3.52239	up	2.83e-11	1.01e-09	Dbxref=GeneID:1063850; Name=lp_3125; func=FAD-dependent oxidoreductase
gene2659	155.022	148.315	168.707	81.585	66.759	44.472	-1.29168	down	0.00496572	0.0201352	Dbxref=GeneID:1063834; Name=lp_3127; func=LPXTG-motif cell wall anchor domain protein
gene2666	75.763	54.876	42.505	210.06	226.839	238.111	1.96292	up	0.000241043	0.00168072	Dbxref=GeneID:1063873; Name=lp_3134; func=MULTISPECIES: YxeA family protein
gene2690	311.674	314.824	296.198	93.488	115.513	120.56	-1.4853	down	0.00145667	0.00745579	Dbxref=GeneID:1063996; Name=xylR; func=ROK family protein
gene2698	10.676	17.72	11.979	78.932	66.519	52.129	2.29082	up	0.000606748	0.00365871	Dbxref=GeneID:1061910; Name=lp_3180; func=hypothetical protein
gene2699	90.522	47.037	81.697	676.557	593.81	337.276	2.87424	up	2.47e-08	5.19e-07	Dbxref=GeneID:1064030; Name=tauE2; func=sulfite exporter TauE/SafE family protein
gene2700	288.334	265.351	225.238	1922.69	1721.86	1508.79	2.72595	up	6.81e-08	1.28e-06	Dbxref=GeneID:1064003; Name=lp_3184; func=AzlD domain-containing protein
gene2701	803.528	756.43	713.228	4654.56	4372.7	3408.98	2.45176	up	6.27e-07	9.89e-06	Dbxref=GeneID:1064046; Name=lp_3185; func=MULTISPECIES: branched-chain amino acid ABC transporter permease
gene2707	134.996	138.562	117.467	757.743	532.152	258.29	1.98524	up	5.77e-05	0.000508026	Dbxref=GeneID:1061958; Name=prtM2; func=foldase
gene2709	439.379	502.614	461.324	1123.31	948.7	1176.65	1.211	up	0.0123404	0.0412815	Dbxref=GeneID:1061911; Name=lp_3195; func=MULTISPECIES: DUF1129 domain-containing protein
gene2710	662.066	797.272	742.868	1623.37	1483.15	1882.09	1.17969	up	0.0143408	0.0466407	Dbxref=GeneID:1064036; Name=lp_3196; func=MULTISPECIES: redox-regulated ATPase YchF
gene2711	440.372	491.74	374.331	1243.17	1086.87	1374.24	1.50355	up	0.00245631	0.0113034	Dbxref=GeneID:1061964; Name=lp_3197; func=MULTISPECIES: DUF951 domain-containing protein
gene2712	419.838	512.638	480.756	1323.5	1098.09	1409.48	1.43875	up	0.00288884	0.013009	Dbxref=GeneID:1061960; Name=parB1; func=MULTISPECIES: ParB/RepB/Spo0J family partition protein
gene2713	293.581	375.45	312.566	919.43	781.004	968.129	1.44286	up	0.00296222	0.0132335	Dbxref=GeneID:1063911; Name=parA; func=ParA family protein
gene2717	1344.06	1344.71	1327.12	550.25	710.994	434.281	-1.24399	down	0.00629074	0.0243149	Dbxref=GeneID:1061978; Name=lp_3205; func=alpha/beta hydrolase
gene2718	1102.56	954.411	1011.17	191.653	179.248	199.589	-2.42708	down	4.56e-07	7.41e-06	Dbxref=GeneID:1061527; Name=lp_3206; func=MULTISPECIES: LysR family transcriptional regulator
gene2719	2132	2653.64	2387.51	121.582	180.296	152.639	-3.98019	down	1.26e-14	7.09e-13	Dbxref=GeneID:1062031; Name=lp_3207; func=MULTISPECIES: PLP-dependent aminotransferase family protein
gene2728	286.68	257.691	277.634	56.801	66.312	98.606	-1.8904	down	6.13e-05	0.000532317	Dbxref=GeneID:1061869; Name=pts26BCA; func=PTS beta-glucoside transporter subunit IIBCA
gene2729	160.519	149.922	136.159	5.962	4.102	13.051	-4.2719	down	1.22e-14	7.01e-13	Dbxref=GeneID:1061921; Name=lp_3220; func=alpha-glucosidase
gene2730	1345.01	1244.03	1207.9	411.201	582.681	695.217	-1.16858	down	0.00977007	0.0345906	Dbxref=GeneID:1061864; Name=lp_3221; func=LacI family DNA-binding transcriptional regulator
gene2731	174.586	220.868	198.54	2926.57	2911.71	907.214	3.5054	up	8.74e-12	3.32e-10	Dbxref=GeneID:1062239; Name=lp_3223; func=YdcF family protein
gene2732	111.84	113.073	102.674	3965.37	3995.66	984.986	4.77128	up	2.49e-18	2.12e-16	Dbxref=GeneID:1062014; Name=lp_3224; func=iron export ABC transporter permease subunit FetB
gene2733	55.1	80.354	75.073	2333.03	2499.61	688.388	4.71284	up	9.97e-18	7.38e-16	Dbxref=GeneID:1062250; Name=lp_3225; func=MULTISPECIES: ATP-binding cassette domain-containing protein
gene2741	273.658	245.589	231.136	91.716	72.274	41.85	-1.86609	down	0.000107133	0.000850402	Dbxref=GeneID:1062207; Name=lp_3236; func=SDR family oxidoreductase
gene2743	1141.59	1383.61	1373.54	280.997	344.632	347.803	-2.00185	down	2.45e-05	0.000246634	Dbxref=GeneID:1061627; Name=lp_3238; func=MerR family transcriptional regulator
gene2744	161.618	214.121	173.024	60.843	84.469	46.916	-1.51335	down	0.00152375	0.00775675	Dbxref=GeneID:1062610; Name=lp_3239; func=SDR family oxidoreductase
gene2745	87.974	83.139	85.741	34.896	30.294	46.657	-1.1994	down	0.0102918	0.0361953	Dbxref=GeneID:1062212; Name=pts28ABC; func=PTS beta-glucoside transporter subunit IIABC
gene2747	1817.35	2240.18	1888.71	308.384	455.246	613.907	-2.10989	down	9.9e-06	0.0001117	Dbxref=GeneID:1061135; Name=lp_3243; func=MULTISPECIES: hypothetical protein
gene2748	3355.88	3871.52	3520.66	489.033	599.084	857.405	-2.46584	down	2.64e-07	4.5e-06	Dbxref=GeneID:1063138; Name=lp_3244; func=MULTISPECIES: NAD(P)H-dependent oxidoreductase
gene2750	298.919	448.68	371.336	172.86	153.944	126.986	-1.30202	down	0.00534295	0.0215562	Dbxref=GeneID:1061469; Name=lp_3246; func=MULTISPECIES: hypothetical protein
gene2753	1320.41	1415.77	1229.38	211.869	285.081	286.434	-2.33973	down	1.69e-06	2.34e-05	Dbxref=GeneID:1061798; Name=lp_3250; func=conserved hypothetical protein
gene2754	124.362	158.178	139.54	49.852	26.674	48.288	-1.75771	down	0.000340558	0.00225169	Dbxref=GeneID:1062975; Name=lp_3251; func=Ser/Thr phosphatase family protein
gene2756	21.351	27.34	27.38	135.311	149.328	193.025	2.65053	up	3.31e-06	4.29e-05	Dbxref=GeneID:1061807; Name=lrgA; func=MULTISPECIES: effector of murein hydrolase
gene2757	45.69	47.254	47.323	155.914	131.395	147.248	1.63135	up	0.00161498	0.00813281	Dbxref=GeneID:1062544; Name=lrgB; func=MULTISPECIES: antiholin
gene2763	2045.38	1817.64	1928.78	558.052	663.374	797.272	-1.52058	down	0.00093551	0.00519522	Dbxref=GeneID:1061575; Name=lp_3265; func=alpha/beta hydrolase
gene2764	1033.61	1045.45	1003.49	427.635	412.894	554.392	-1.14394	down	0.0114554	0.0391128	Dbxref=GeneID:1062205; Name=glyK; func=glycerate kinase
gene2767	2318.57	1944.74	2376.9	447.34	323.926	294.136	-2.63983	down	4.63e-08	8.97e-07	Dbxref=GeneID:1061814; Name=purB; func=adenylosuccinate lyase
gene2768	10091.7	8195.22	10020.8	175.118	178.563	129.764	-5.87169	down	2.74e-25	9.63e-23	Dbxref=GeneID:1062621; Name=purA; func=adenylosuccinate synthase
gene2769	8446.23	7226	8817.11	177.233	163.237	117.05	-5.74217	down	1.77e-24	4.98e-22	Dbxref=GeneID:1061982; Name=guaC; func=MULTISPECIES: guanosine monophosphate reductase
gene2770	715.515	780.779	747.975	61.458	72.54	94.548	-3.29567	down	7.42e-11	2.51e-09	Dbxref=GeneID:1062561; Name=ptp2; func=tyrosine-protein phosphatase
gene2774	496.003	487.115	546.687	1192.67	1532.71	1180.36	1.35225	up	0.0049317	0.0200946	Dbxref=GeneID:1062657; Name=kup2; func=MULTISPECIES: potassium transporter Kup
gene2776	106.451	159.636	138.663	423.381	348.523	302.198	1.40802	up	0.00394329	0.0167381	Dbxref=GeneID:1061846; Name=lp_3281; func=hypothetical protein HMPREF0531_12963
gene2780	144.347	131.78	159.714	209.002	276.605	883.399	1.65125	up	0.00082561	0.00467735	Dbxref=GeneID:1061845; Name=lp_3286; func=MULTISPECIES: hemolysin III family protein
gene2781	594.124	565.819	649.968	201.79	347.055	207.79	-1.25825	down	0.00687536	0.0260024	Dbxref=GeneID:1061884; Name=lp_3287; func=transcriptional regulator, ArsR family
gene2783	64.154	105.823	119.223	28.905	26.768	52.863	-1.41387	down	0.00489358	0.0200686	Dbxref=GeneID:1061837; Name=lp_3290; func=MULTISPECIES: XRE family transcriptional regulator
gene2784	71.171	114.501	110.571	12.143	34.112	36.891	-1.83302	down	0.00236548	0.011024	Dbxref=GeneID:1061805; Name=lp_3291; func=hypothetical protein LPST_C2711
gene2785	106.757	136.7	94.117	600.444	597.313	335.114	2.18295	up	4.84e-05	0.000441254	Dbxref=GeneID:1061863; Name=lp_3292; func=MULTISPECIES: hypothetical protein
gene2789	1253.86	1409.53	1573.27	630.759	562.226	677.514	-1.17951	down	0.00924726	0.0330596	Dbxref=GeneID:1061887; Name=folC2; func=MULTISPECIES: bifunctional folylpolyglutamate synthase/dihydrofolate synthase
gene2790	883.272	975.926	1086.9	376.379	284.081	392.447	-1.48442	down	0.0013675	0.00711609	Dbxref=GeneID:1062597; Name=folE; func=MULTISPECIES: GTP cyclohydrolase I FolE
gene2791	581.855	659.074	820.988	196.637	140.04	220.221	-1.8885	down	7.24e-05	0.000607054	Dbxref=GeneID:1061876; Name=folK; func=MULTISPECIES: 2-amino-4-hydroxy-6-hydroxymethyldihydropteridine diphosphokinase
gene2792	656.163	722.645	673.917	173.265	135.974	150.538	-2.15853	down	8.81e-06	0.000101902	Dbxref=GeneID:1061943; Name=folB; func=dihydroneopterin aldolase
gene2795	498.5	593.783	526.854	5289.76	5252.26	2763.8	3.03876	up	1.38e-09	3.76e-08	Dbxref=GeneID:1062608; Name=lp_3303; func=MULTISPECIES: MFS transporter
gene2797	10.143	13.132	13.657	23.623	40.629	29.717	1.34724	up	0.01529	0.0492151	Dbxref=GeneID:1062601; Name=ISP1_10; func=ISL3-like element ISP1 family transposase
gene2805	1030.61	1112.29	866.143	136.612	215.638	215.332	-2.4064	down	8.65e-07	1.32e-05	Dbxref=GeneID:1064020; Name=lp_3316; func=hypothetical protein HMPREF0531_10132
gene2806	1570.4	1498.9	1456.16	311.613	466.778	701.344	-1.61272	down	0.000473655	0.00299768	Dbxref=GeneID:1064022; Name=lp_3318; func=MULTISPECIES: aldo/keto reductase
gene2812	840.861	779.351	826.619	4687.38	4840.05	2695.85	2.32064	up	2.08e-06	2.81e-05	Dbxref=GeneID:1063943; Name=lp_3327; func=cadmium-translocating P-type ATPase
gene2817	415.391	453.101	459.56	107.106	134.643	133.972	-1.82157	down	0.000110408	0.000871479	Dbxref=GeneID:1063938; Name=glmS2; func=SIS domain-containing protein
gene2822	1933.13	1846.31	1830.5	595.532	635.031	678.735	-1.55494	down	0.000768007	0.00443142	Dbxref=GeneID:1063920; Name=pgpA; func=MULTISPECIES: phosphatidylglycerophosphatase A
gene2823	32.734	37.046	25.042	105.609	108.602	125.109	1.83932	up	0.000419509	0.00269753	Dbxref=GeneID:1063929; Name=lp_3343; func=NmrA family transcriptional regulator
gene2824	24.402	21.264	6.845	118.397	165.619	58.98	2.70743	up	6.4e-06	7.76e-05	Dbxref=GeneID:1063930; Name=lp_3344; func=MarR family transcriptional regulator
gene2825	588.348	595.405	599.816	21.048	42.234	135.303	-3.16692	down	8.12e-10	2.4e-08	Dbxref=GeneID:1063912; Name=spx4; func=Spx/MgsR family RNA polymerase-binding regulatory protein
gene2828	1447.47	1490.25	1483.12	529.078	577.93	713.838	-1.27971	down	0.0048993	0.0200686	Dbxref=GeneID:1063921; Name=mutY; func=A/G-specific adenine glycosylase
gene2831	69247.6	69273.3	59931.7	7091.05	13154.8	31594.3	-1.93665	down	3.16e-05	0.000304112	Dbxref=GeneID:1063892; Name=hsp3; func=MULTISPECIES: Hsp20/alpha crystallin family protein
gene2833	13727	12393.3	12352	3186.17	3952.77	3194.1	-1.89655	down	4.74e-05	0.000435046	Dbxref=GeneID:1063890; Name=lp_3355; func=MULTISPECIES: NAD-dependent epimerase/dehydratase family protein
gene2834	569.369	553.154	641.989	1959.36	2804.85	960.805	1.69801	up	0.000470641	0.00298533	Dbxref=GeneID:1063908; Name=lp_3356; func=GNAT family N-acetyltransferase
gene2835	177.576	207.732	192.922	978.439	1038.71	646.603	2.20374	up	7.73e-06	9.13e-05	Dbxref=GeneID:1063909; Name=lp_3358; func=putative membrane protein
gene2836	749.588	602.341	721.799	6890.43	7804.46	3968.05	3.16988	up	3.36e-10	1.03e-08	Dbxref=GeneID:1063882; Name=lp_3359; func=MULTISPECIES: VIT family protein
gene2837	338.22	284.153	273.493	4937.07	5604.07	2517.13	3.86553	up	1.29e-13	6.38e-12	Dbxref=GeneID:1063881; Name=lp_3360; func=MULTISPECIES: VIT family protein
gene2838	462.072	561.019	477.687	2339.16	2664.22	1443.89	2.10298	up	1.6e-05	0.000167331	Dbxref=GeneID:1063887; Name=pva2; func=MULTISPECIES: linear amide C-N hydrolase
gene2839	202.838	189.504	189.543	1747.41	1839.61	799.962	2.91442	up	5.6e-09	1.32e-07	Dbxref=GeneID:1063877; Name=copB; func=copper-translocating P-type ATPase
gene2841	2304.07	2486.3	1995.55	723.395	1106.91	1035.24	-1.24373	down	0.00645256	0.0247601	Dbxref=GeneID:1063866; Name=lp_3366; func=MULTISPECIES: hypothetical protein
gene2844	189.012	209.159	212.08	667.684	778.91	588.628	1.73771	up	0.000714266	0.00416408	Dbxref=GeneID:11933318; Name=lp_3371; func=MULTISPECIES: hypothetical protein
gene2845	396.525	520.762	518.257	1135.65	1357.53	1237.05	1.37766	up	0.00491602	0.020086	Dbxref=GeneID:11933319; Name=lp_3372; func=hypothetical protein
gene2846	2742.31	2481.96	2755.07	769.583	923.544	621.636	-1.7854	down	0.000133184	0.00103098	Dbxref=GeneID:1063880; Name=lp_3373; func=hypothetical protein HMPREF0531_12656
gene2867	69.128	82.519	67.663	197.918	174.562	189.028	1.35632	up	0.00535453	0.0215562	Dbxref=GeneID:1063784; Name=pacL3; func=cation-translocating P-type ATPase
gene2870	7621.02	7594.45	8419.23	2561.01	2583.94	2292.5	-1.66802	down	0.000306833	0.00208261	Dbxref=GeneID:1063779; Name=lp_3403; func=2,5-diketo-D-gluconate reductase
gene2871	57.844	74.553	99.265	437.74	408.881	256.199	2.25109	up	8.25e-06	9.7e-05	Dbxref=GeneID:1063768; Name=lp_3404; func=MULTISPECIES: threonine/serine exporter
gene2872	47.139	46.947	49.781	282.924	217.205	165.729	2.21046	up	3.35e-05	0.000320028	Dbxref=GeneID:1063782; Name=lp_3405; func=MULTISPECIES: threonine/serine exporter
gene2880	39.608	35.749	38.887	8.236	8.814	14.868	-1.83958	down	0.000653874	0.00390103	Dbxref=GeneID:1063756; Name=lp_3413; func=cell surface protein precursor
gene2881	41.121	31.503	40.816	5.262	15.486	19.461	-1.49627	down	0.00645877	0.0247601	Dbxref=GeneID:1063746; Name=lp_3414; func=MULTISPECIES: WxL domain-containing protein
gene2882	0	12.102	5.843	36.578	32.448	39.669	2.59843	up	9.09e-05	0.000735914	Dbxref=GeneID:1063759; Name=lp_3415; func=transcriptional regulator, AraC family
gene2888	1104.97	1141.75	1168.8	31934.8	24676.3	7610.07	4.23287	up	9.7e-16	6.05e-14	Dbxref=GeneID:1063747; Name=lp_3421; func=LysM peptidoglycan-binding domain-containing protein
gene2896	188.069	145.436	156.404	544.751	624.323	627.49	1.87465	up	0.000152483	0.00112167	Dbxref=GeneID:1063685; Name=lp_3429; func=TetR/AcrR family transcriptional regulator
gene2897	151.742	157.812	229.024	817.612	684.912	952.875	2.18872	up	8.81e-06	0.000101902	Dbxref=GeneID:1063674; Name=lp_3430; func=Dyp-type peroxidase
gene2908	2575.63	2316.1	2434.57	761.583	898.905	512.271	-1.75355	down	0.00016298	0.00118954	Dbxref=GeneID:1063595; Name=lp_3444; func=MULTISPECIES: Crp/Fnr family transcriptional regulator
gene2909	1917.95	1974.03	1731.36	503.235	474.689	777.282	-1.67979	down	0.000275098	0.00188543	Dbxref=GeneID:1063596; Name=pepO; func=peptidase M13
gene2911	5501.17	4895.07	5229.14	808.568	674.25	451.336	-3.01411	down	8.21e-10	2.4e-08	Dbxref=GeneID:1063541; Name=nox5; func=MULTISPECIES: NADH oxidase
gene2924	42.768	34.731	39.867	6.567	22.256	21.398	-1.2246	down	0.0125768	0.0419227	Dbxref=GeneID:1063466; Name=lacS; func=lactose permease
gene2925	23.099	24.871	15.411	4.847	1.667	11.706	-1.79836	down	0.000922468	0.00514313	Dbxref=GeneID:1063513; Name=lacA; func=beta-galactosidase
gene2927	26.812	23.446	17.61	8.703	1.746	7.089	-1.95206	down	0.000340389	0.00225169	Dbxref=GeneID:1063443; Name=ram1; func=alpha-L-rhamnosidase
gene2928	21.001	37.848	19.076	3.327	0	12.013	-2.34456	down	6.34e-05	0.000548524	Dbxref=GeneID:1063465; Name=ramP1; func=MFS transporter
gene2929	34.909	26.682	30.06	3.601	2.891	10.703	-2.41396	down	1.46e-05	0.000157122	Dbxref=GeneID:1063440; Name=ram2; func=alpha-L-rhamnosidase
gene2930	24.058	26.955	20.245	0	8.923	4.699	-2.38686	down	6.61e-05	0.000564402	Dbxref=GeneID:1063473; Name=ramP2; func=MULTISPECIES: MFS transporter
gene2931	167.436	161.584	171.851	24.471	53.146	53.998	-1.92809	down	7.43e-05	0.00062064	Dbxref=GeneID:1063419; Name=ramR; func=MULTISPECIES: AraC family transcriptional regulator
gene2944	267.988	250.684	244.489	61.108	63.537	80.716	-1.89381	down	7.69e-05	0.000637274	Dbxref=GeneID:1063008; Name=lp_3489; func=MULTISPECIES: glyceraldehyde 3-phosphate reductase
gene2960	186.016	193.313	156.084	48.435	60.472	73.454	-1.55384	down	0.00121382	0.00646294	Dbxref=GeneID:1062690; Name=estA; func=MULTISPECIES: alpha/beta fold hydrolase
gene2962	602.242	634.119	580.128	255.908	288.064	229.741	-1.23128	down	0.00689326	0.026035	Dbxref=GeneID:1062841; Name=pts29C; func=MULTISPECIES: PTS sugar transporter subunit IIC
gene2963	133.362	107.328	113.362	37.349	31.176	43.808	-1.65615	down	0.000710644	0.00416023	Dbxref=GeneID:1062586; Name=lp_3508; func=N-acetylmuramic acid 6-phosphate etherase
gene2968	587.541	508.235	584.487	256.948	245.318	211.621	-1.23492	down	0.00712603	0.0267703	Dbxref=GeneID:1062503; Name=bglG4; func=MULTISPECIES: PRD domain-containing protein
gene2978	1653.07	1564.11	1564.93	423.375	465.455	591.472	-1.69175	down	0.000255792	0.00177476	Dbxref=GeneID:1062372; Name=pbg9; func=MULTISPECIES: glycoside hydrolase family 1 protein
gene2982	117.36	107.624	128.423	19.975	28.961	92.598	-1.32016	down	0.00460648	0.0191483	Dbxref=GeneID:1062259; Name=treP; func=glycoside hydrolase family 65 protein
gene2986	513.513	586.791	758.138	89.922	91.418	310.397	-1.91813	down	9.22e-05	0.000744557	Dbxref=GeneID:11933323; Name=lp_3535; func=hypothetical protein
gene2987	4619.77	5018.41	4537.85	836.432	1067.81	1744.98	-1.95779	down	2.78e-05	0.000272981	Dbxref=GeneID:1062382; Name=bsh1; func=linear amide C-N hydrolase
gene2988	20.409	17.199	19.377	1.741	1.397	4.14	-2.96845	down	6.07e-05	0.000529823	Dbxref=GeneID:1061922; Name=lp_3537; func=sugar-phosphatase
gene2989	13.465	11.494	18.705	4.978	2.854	3.193	-1.98537	down	0.000587639	0.00355876	Dbxref=GeneID:1062256; Name=tkt4; func=transketolase
gene2990	17.63	17.558	4.396	0	0	2.869	-3.7849	down	8.69e-05	0.000709573	Dbxref=GeneID:1061929; Name=tal2; func=transaldolase
gene2991	6.541	11.167	10.485	2.073	0	4.106	-2.18934	down	0.00294525	0.0131996	Dbxref=GeneID:1062258; Name=lp_3540; func=PTS ascorbate transporter subunit IIC
gene2999	32.639	24.38	36.622	12.066	7.263	5.578	-1.91046	down	0.0032913	0.0145189	Dbxref=GeneID:1061942; Name=pts35A; func=MULTISPECIES: PTS sugar transporter subunit IIA
gene3000	178.484	252.515	147.861	68.449	75.725	79.171	-1.37393	down	0.00371169	0.0159712	Dbxref=GeneID:1061966; Name=lp_3549; func=DeoR/GlpR transcriptional regulator
gene3001	150.022	184.096	143.082	32.682	31.477	37.988	-2.22391	down	4.14e-06	5.19e-05	Dbxref=GeneID:1061938; Name=xfp; func=phosphoketolase
gene3004	48.546	51.93	56.488	22.932	19.205	15.276	-1.45094	down	0.00360084	0.015519	Dbxref=GeneID:1061986; Name=araA; func=MULTISPECIES: L-arabinose isomerase
gene3005	45.69	52.505	57.182	3.898	3.128	7.208	-3.44808	down	5.65e-08	1.09e-06	Dbxref=GeneID:1061949; Name=araD; func=MULTISPECIES: L-ribulose-5-phosphate 4-epimerase
gene3006	64.774	51.767	47.555	6.208	4.983	3.983	-3.43461	down	1.11e-09	3.11e-08	Dbxref=GeneID:1061948; Name=araB; func=L-ribulokinase
gene3007	63.094	53.73	34.884	2.028	0	5.894	-4.25877	down	1.05e-11	3.93e-10	Dbxref=GeneID:1061994; Name=araP; func=MULTISPECIES: sugar porter family MFS transporter
gene3018	0	0	0	0	0	130.322	15.4068	up	4.18e-09	1.06e-07	Dbxref=GeneID:1062013; Name=lp_3569; func=MULTISPECIES: IS5 family transposase
gene3019	0	0	0	0	0	149.766	15.6074	up	1.44e-09	3.9e-08	Dbxref=GeneID:1062008; Name=lp_3570; func=IS5 family transposase
gene3020	108.155	143.001	133.909	14.477	14.939	31.687	-2.65573	down	6.63e-07	1.04e-05	Dbxref=GeneID:1062015; Name=nanE; func=N-acetylmannosamine-6-phosphate 2-epimerase
gene3022	241.064	260.661	224.115	580.529	689.713	538.776	1.31748	up	0.00787978	0.0292499	Dbxref=GeneID:1062029; Name=lp_3573; func=MULTISPECIES: hypothetical protein
gene3026	2058.53	1984.39	2104.28	5759.24	5198.47	3291.01	1.21283	up	0.0114383	0.0391017	Dbxref=GeneID:1062016; Name=kat; func=catalase
gene3027	24121.2	28098.2	24853.1	5660.37	6857.57	7933.29	-1.91403	down	4.05e-05	0.000376743	Dbxref=GeneID:1062042; Name=spx5; func=MULTISPECIES: Spx/MgsR family RNA polymerase-binding regulatory protein
gene3028	4657.69	7379.11	4845.53	11975.3	9937.99	26125.6	1.50869	up	0.00174684	0.00870325	Dbxref=GeneID:1062045; Name=lamA; func=DNA-binding response regulator
gene3029	2756.36	4007.84	2947.87	7840.16	6375.86	13462.3	1.51091	up	0.0017037	0.00850335	Dbxref=GeneID:1062036; Name=lamC; func=GHKL domain-containing protein
gene3030	1937.24	2655.46	1799.71	6861.27	6118.82	11790.8	1.95421	up	6.36e-05	0.00054854	Dbxref=GeneID:1062052; Name=lamD; func=cyclic lactone autoinducer peptide
gene3031	939.034	1157.38	965.438	3239.73	3014.39	5128.85	1.8944	up	9.54e-05	0.000767729	Dbxref=GeneID:1062033; Name=lamB; func=accessory gene regulator AgrB
gene3033	979.719	952.555	954.369	158.724	166.751	171.471	-2.53822	down	1.5e-07	2.66e-06	Dbxref=GeneID:1062059; Name=lox; func=MULTISPECIES: L-lactate oxidase
gene3034	1089.1	1073.76	990.229	140.053	146.845	149.275	-2.85379	down	5.28e-09	1.28e-07	Dbxref=GeneID:1062061; Name=pox4; func=pyruvate oxidase
gene3035	1422.42	1440.59	1434.06	90.049	214.146	162.994	-3.20127	down	1.98e-10	6.38e-09	Dbxref=GeneID:1062053; Name=lp_3588; func=MULTISPECIES: Rrf2 family transcriptional regulator
gene3036	39.592	83.086	58.703	231.306	196.977	136.294	1.63813	up	0.000878622	0.004928	Dbxref=GeneID:1062065; Name=pox5; func=pyruvate oxidase
gene3039	21.051	22.462	28.681	0	9.369	5.727	-2.25749	down	0.000320098	0.00213146	Dbxref=GeneID:1062068; Name=rhaD; func=MULTISPECIES: rhamnulose-1-phosphate aldolase
gene3040	13.968	7.949	11.195	0	2.664	2.923	-2.56656	down	0.000293832	0.0019992	Dbxref=GeneID:1062074; Name=rhaA; func=L-rhamnose isomerase
gene3044	491.41	598.022	538.115	125.319	217.539	216.342	-1.54126	down	0.000899328	0.00502408	Dbxref=GeneID:1062084; Name=rhaR; func=MULTISPECIES: AraC family transcriptional regulator
gene3046	102.597	99.418	84.006	9.226	7.405	39.807	-2.34132	down	2.96e-05	0.0002884	Dbxref=GeneID:1062077; Name=pts36A; func=MULTISPECIES: PTS sugar transporter subunit IIA
gene3047	57.484	40.893	36.857	4.554	7.31	30.074	-1.68906	down	0.0102339	0.0360368	Dbxref=GeneID:1062076; Name=pts36B; func=PTS galactitol transporter subunit IIB
gene3051	1213.99	1122.37	1097.65	210.149	258.248	357.265	-2.05627	down	1.24e-05	0.000134496	Dbxref=GeneID:1062090; Name=iolT1; func=sugar porter family MFS transporter
gene3052	1411.9	1215.64	1304.49	61.594	72.506	165.607	-3.71364	down	3.88e-13	1.76e-11	Dbxref=GeneID:1061776; Name=lp_3605; func=myo-inositol 2-dehydrogenase
gene3053	2064.57	1840.5	1771.87	89.051	85.551	187.842	-3.96927	down	1.61e-14	8.88e-13	Dbxref=GeneID:1062111; Name=iolG; func=gfo/Idh/MocA family oxidoreductase
gene3054	1251.29	1145.88	1111.1	37.761	35.359	103.911	-4.30866	down	4.53e-16	2.96e-14	Dbxref=GeneID:1061765; Name=iolE; func=myo-inosose-2 dehydratase
gene3055	1205.14	1259.75	1116.14	55.229	75.357	102.13	-3.94371	down	2.92e-14	1.49e-12	Dbxref=GeneID:1062102; Name=lp_3608; func=inositol 2-dehydrogenase
gene3056	316.995	263.523	293.953	87.164	87.837	78.289	-1.78761	down	0.000149229	0.00111525	Dbxref=GeneID:1062101; Name=iolT2; func=sugar porter family MFS transporter
gene3057	250.972	247.463	280.201	31.85	53.349	80.114	-2.23573	down	4.45e-06	5.54e-05	Dbxref=GeneID:1061775; Name=lp_3612; func=inositol 2-dehydrogenase
gene3058	254.574	179.93	221.143	33.394	38.985	72.98	-2.17328	down	1.94e-05	0.000199873	Dbxref=GeneID:1061784; Name=lp_3613; func=heme-degrading domain-containing protein
gene3059	450.369	356.915	397.488	42.638	62.333	110.627	-2.48233	down	3.73e-07	6.17e-06	Dbxref=GeneID:1061769; Name=lp_3614; func=NADP-dependent oxidoreductase
gene3061	354.618	430.836	320.818	22.65	76.022	152.851	-2.13693	down	1.08e-05	0.000119667	Dbxref=GeneID:1061806; Name=tal3; func=fructose-6-phosphate aldolase
gene3062	54.659	44.23	88.162	7.577	15.204	21.018	-2.09439	down	0.000700406	0.00411745	Dbxref=GeneID:1061804; Name=pts37A; func=PTS sorbitol transporter subunit IIA
gene3063	49.272	50.33	59.538	11.209	14.62	19.248	-1.81976	down	0.00049282	0.00309113	Dbxref=GeneID:1061756; Name=pts37BC; func=PTS sorbitol transporter subunit IIB
gene3064	42.929	45.004	40.562	0	14.078	15.887	-2.10025	down	0.000456339	0.00292099	Dbxref=GeneID:1061752; Name=pts37C; func=PTS sorbitol transporter subunit IIC
gene3065	29.793	39.562	16.714	0	11.05	6.546	-2.29005	down	0.00082738	0.00467795	Dbxref=GeneID:1061763; Name=srlM1; func=glucitol operon activator
gene3066	39.322	40.536	45.67	2.295	4.913	8.287	-3.01789	down	4.34e-08	8.53e-07	Dbxref=GeneID:1061786; Name=srlR1; func=HTH domain-containing protein
gene3067	25.494	23.803	23.242	5.301	11.347	6.536	-1.6455	down	0.0065262	0.0249845	Dbxref=GeneID:1061717; Name=srlD1; func=Sorbitol-6-phosphate 2-dehydrogenase
gene3071	3809.97	3708.85	4204.43	71.756	80.629	210.14	-5.01514	down	2.35e-20	2.44e-18	Dbxref=GeneID:1061722; Name=bgl; func=beta glucosidase
gene3072	3470.14	3203.46	3983.59	79.201	73.946	218.194	-4.84293	down	2.74e-19	2.57e-17	Dbxref=GeneID:1061659; Name=lp_3630; func=ROK family protein
gene3073	5331.67	4976.83	6086.18	91.034	86.158	308.324	-5.07756	down	7.33e-21	8.24e-19	Dbxref=GeneID:1061656; Name=lp_3631; func=alpha-mannosidase
gene3074	6395.47	5943.17	6799.38	41.852	44.199	381.437	-5.35536	down	2.39e-22	3.74e-20	Dbxref=GeneID:1061644; Name=lp_3632; func=metal-independent alpha-mannosidase
gene3075	2101.45	1750.27	2152.77	82.711	95.295	278.764	-3.7165	down	3.03e-13	1.42e-11	Dbxref=GeneID:1061733; Name=lp_3633; func=GntR family transcriptional regulator
gene3076	820.655	768.609	1017.84	46.301	61.582	193.08	-3.11478	down	3.05e-10	9.62e-09	Dbxref=GeneID:1061684; Name=lp_3634; func=alpha-1 2-mannosidase
gene3082	10.242	14.124	22.101	8.738	2.104	6.002	-1.46381	down	0.00973774	0.0345493	Dbxref=GeneID:1061646; Name=dexB; func=alpha-glucosidase
gene3083	83.492	89.215	94.658	40.511	28.644	44.081	-1.23946	down	0.0089565	0.0323493	Dbxref=GeneID:1061629; Name=lp_3642; func=MULTISPECIES: extracellular solute-binding protein
gene3085	66.515	82.143	67.17	14.754	21.314	18.318	-1.98852	down	0.000112995	0.000889403	Dbxref=GeneID:1061640; Name=lp_3644; func=MULTISPECIES: sugar ABC transporter permease
gene3086	184.099	193.689	214.333	68.314	77.623	88.205	-1.3385	down	0.00386983	0.0164512	Dbxref=GeneID:1061616; Name=gcnA; func=MULTISPECIES: beta-N-acetylhexosaminidase
gene3087	184.117	177.204	161.45	60.057	68.86	50.316	-1.54433	down	0.00132066	0.00689785	Dbxref=GeneID:1061620; Name=lp_3646; func=MULTISPECIES: AraC family transcriptional regulator
gene3088	0.732	3.647	1.644	12.997	12.388	11.803	2.62568	up	0.000164623	0.00119842	Dbxref=GeneID:1061619; Name=lp_3647; func=ABC transporter ATP-binding protein
gene3093	23.863	15.01	26.776	1.393	3.354	6.991	-2.48328	down	0.000139789	0.00106452	Dbxref=GeneID:1061611; Name=pts38BC; func=MULTISPECIES: PTS sorbitol transporter subunit IIB
gene3095	12.634	42.781	25.516	2.802	2.249	16.286	-1.92319	down	0.00589328	0.0230642	Dbxref=GeneID:1061618; Name=srlM2; func=MULTISPECIES: glucitol operon activator
gene3096	17.163	19.145	20.799	4.568	7.333	10.459	-1.35263	down	0.0119183	0.0403984	Dbxref=GeneID:1061617; Name=srlR2; func=HTH domain-containing protein
gene3098	311.223	259.498	316.722	41.74	67.002	108.569	-2.02988	down	2.5e-05	0.000251272	Dbxref=GeneID:1061612; Name=rbsU; func=ribose transport protein
gene3099	404.382	454.286	439.215	57.405	71.99	108.997	-2.44474	down	1.02e-06	1.5e-05	Dbxref=GeneID:1061601; Name=rbsD; func=MULTISPECIES: D-ribose pyranase
gene3100	364.433	367.106	407.35	35.481	39.62	75.391	-2.91984	down	5.82e-09	1.36e-07	Dbxref=GeneID:1061610; Name=rbsK1; func=ribokinase
gene3105	78.726	68.902	48.182	521.213	507.519	303.337	2.76612	up	1.07e-07	1.97e-06	Dbxref=GeneID:1061602; Name=padA; func=Chain A, Crystal Structure Of P-Coumaric Acid Decarboxylase From Lactobacillus Plantarum: Structural Insights Into The Active Site And Decarboxylation Catalytic Mechanism >gi|268612116|pdb|2W2A|B Chain B, Crystal Structure Of P-Coumaric Acid Decarbox ...
gene3116	949.917	909.331	982.356	362.813	293.584	388.29	-1.44363	down	0.00163739	0.00821616	Dbxref=GeneID:1061558; Name=gidA; func=MULTISPECIES: tRNA uridine-5-carboxymethylaminomethyl(34) synthesis enzyme MnmG
gene3117	922.157	949.568	952.09	303.138	267.059	362.115	-1.59876	down	0.000539403	0.00334597	Dbxref=GeneID:1061572; Name=trmE; func=MULTISPECIES: tRNA uridine-5-carboxymethylaminomethyl(34) synthesis GTPase MnmE
gene3118	1065.58	1185.02	1168.93	444.265	441.302	411.737	-1.39828	down	0.00229902	0.0108139	Dbxref=GeneID:1061560; Name=lp_3683; func=MULTISPECIES: KH domain-containing protein
gene3123	8179.94	9394.16	8645.87	28489	31464.5	39829.2	1.92812	up	7.01e-05	0.000591187	Dbxref=GeneID:1061549; Name=rpmH; func=hypothetical protein LPST_C3014
gene3124	26.689	49.174	58.396	149.477	161.546	140.748	1.75055	up	0.000567862	0.00349933	Dbxref=GeneID:3125622; Name=repA; func=replication protein
gene3132	0	0	0	0	0	1025.67	18.3832	up	5.76e-21	6.74e-19	Dbxref=GeneID:3125580; Name=orf3; func=MULTISPECIES: hypothetical protein
gene3135	0	0	0	0	0	38.614	13.652	up	0.00177786	0.0088109	Dbxref=GeneID:3125604; Name=orf6; func=hypothetical protein
gene3136	0	0	0	0	0	831.806	18.0809	up	2.61e-23	4.89e-21	Dbxref=GeneID:3125607; Name=tnpR1; func=MULTISPECIES: recombinase family protein
gene3151	0.6	5.376	0	2.661	2.669	87.155	3.95129	up	2.49e-10	7.94e-09	Dbxref=GeneID:3125613; Name=traI; func=type IA DNA topoisomerase
gene3155	5.084	12.657	5.704	43.224	33.938	52.377	2.46588	up	1.08e-05	0.000119765	Dbxref=GeneID:3125612; Name=traK; func=conjugal transfer protein
gene3160	10.834	1.798	8.104	58.072	54.646	89.93	3.28858	up	1.12e-08	2.51e-07	Dbxref=GeneID:3125616; Name=traF; func=conjugal transfer protein
gene3161	0.635	1.896	0.712	26.037	28.24	34.019	4.76566	up	2.89e-11	1.02e-09	Dbxref=GeneID:3125588; Name=traE; func=DUF87 domain-containing protein
gene3162	5.823	15.465	15.245	111.939	133.038	120.56	3.32264	up	1.31e-08	2.87e-07	Dbxref=GeneID:3125600; Name=traD; func=conjugal transfer protein
gene3163	3.529	0	0	15.656	0	25.849	3.55483	up	0.00671687	0.0255405	Dbxref=GeneID:3125603; Name=traC; func=conjugal transfer protein
gene3168	244.015	267.324	225.882	1102.79	939.411	863.253	1.97859	up	8.9e-05	0.000722909	Dbxref=GeneID:3125614; Name=orf39; func=MULTISPECIES: hypothetical protein
gene3169	247.951	288.099	226.691	1359.66	1540.87	1377.55	2.48769	up	8.31e-07	1.28e-05	Dbxref=GeneID:3125596; Name=orf40; func=hypothetical protein
