# Supplementary material for: Comparative transcriptomic analysis of Lactiplantibacillus plantarum RS66CD biofilm in high-salt conditions and planktonic cells
Source: PeerJ. 2020 Aug 3;8:e9639. doi: 10.7717/peerj.9639 (PMC7409786; doi:10.7717/peerj.9639)
Supplement: Supplemental Information 2 [file peerj-08-9639-s002.xls]

## Sheet: General_Info
General Info
Run information
	Session name				490nm
	Session creator				admin
	Run name				490nm
	Run creator				admin
	Run started				2018/10/31 14:55:35+08:00
	Total warnings				0
	Total errors				0
Instrument parameters
	Instrument name				VarioskanFlash
	Instrument version				4.00.53
	Instrument serial number				3001-2207
	Actual instrument temperature				24.6 26.4 26.5
	Dispenser				1 2
	LumiSens module				1511-02
	LumiSens scaling factor				1.539
SW Parameters
	Run Software Version				SkanIt Software 2.4.5 RE for Varioskan Flash
	Current Software Version				SkanIt Software 2.4.5 RE for Varioskan Flash

## Sheet: Photometric1
Photometric1
Plate 1: 1
Sample	1	2	3	4	5	6	7	8	9	10	11	12
A	Un_0001 1/12	Un_0001 2/12	Un_0001 3/12	Un_0001 4/12	Un_0001 5/12	Un_0001 6/12	Un_0001 7/12	Un_0001 8/12	Un_0001 9/12	Un_0001 10/12	Un_0001 11/12	Un_0001 12/12
B	Un_0002 1/12	Un_0002 2/12	Un_0002 3/12	Un_0002 4/12	Un_0002 5/12	Un_0002 6/12	Un_0002 7/12	Un_0002 8/12	Un_0002 9/12	Un_0002 10/12	Un_0002 11/12	Un_0002 12/12
C	Un_0003 1/12	Un_0003 2/12	Un_0003 3/12	Un_0003 4/12	Un_0003 5/12	Un_0003 6/12	Un_0003 7/12	Un_0003 8/12	Un_0003 9/12	Un_0003 10/12	Un_0003 11/12	Un_0003 12/12
D	Un_0004 1/12	Un_0004 2/12	Un_0004 3/12	Un_0004 4/12	Un_0004 5/12	Un_0004 6/12	Un_0004 7/12	Un_0004 8/12	Un_0004 9/12	Un_0004 10/12	Un_0004 11/12	Un_0004 12/12
E	Un_0005 1/12	Un_0005 2/12	Un_0005 3/12	Un_0005 4/12	Un_0005 5/12	Un_0005 6/12	Un_0005 7/12	Un_0005 8/12	Un_0005 9/12	Un_0005 10/12	Un_0005 11/12	Un_0005 12/12
F	Un_0006 1/12	Un_0006 2/12	Un_0006 3/12	Un_0006 4/12	Un_0006 5/12	Un_0006 6/12	Un_0006 7/12	Un_0006 8/12	Un_0006 9/12	Un_0006 10/12	Un_0006 11/12	Un_0006 12/12
G	Un_0007 1/12	Un_0007 2/12	Un_0007 3/12	Un_0007 4/12	Un_0007 5/12	Un_0007 6/12	Un_0007 7/12	Un_0007 8/12	Un_0007 9/12	Un_0007 10/12	Un_0007 11/12	Un_0007 12/12
H	Un_0008 1/12	Un_0008 2/12	Un_0008 3/12	Un_0008 4/12	Un_0008 5/12	Un_0008 6/12	Un_0008 7/12	Un_0008 8/12	Un_0008 9/12	Un_0008 10/12	Un_0008 11/12	Un_0008 12/12
NaCl concentration（g/L)	40	44	46	48	52	56	60
Value	1	2	3	4	5	6	7	8	9	10	11	12			NaCl concentration	average value	Standard deviation
A	0.10699	0.284536	0.367494	0.526593	0.229373	0.220801	0.163104	0.130496	0.0453491	0.04814	0.0425546	0.0452462			40	0.155	0.0167	b
B	0.143531	0.267096	0.312356	0.536183	0.244009	0.216631	0.16111	0.150814	0.07357	0.0567067	0.0482133	0.046444			44	0.276	0.012	d
C	0.167139	0.271362	0.286281	0.364928	0.230866	0.253875	0.159116	0.385977	0.0938987	0.0365677	0.0423	0.0436262			46	0.34	0.038	e
D	0.157045	0.170738	0.193369	0.184058	0.346486	0.500847	0.491655	0.0776936	0.117109	0.040008	0.0361507	0.0424781			48	0.531	0.007	f
E	0.146478	0.14405	0.224285	0.179037	0.303778	0.377187	0.359751	0.0856058	0.0590573	0.0440465	0.0457666	0.0461003			52	0.238	0.012	cd
F	0.160938	0.187661	0.286809	0.464807	0.250264	0.316401	0.155864	0.047665	0.0359819	0.0440301	0.0436656	0.0426708			56	0.235	0.026	cd
G	0.0496808	0.0444797	0.0542079	0.0470073	0.0549722	0.0627459	0.140012	0.0508809	0.0524588	0.035124	0.0460505	0.0495262			60	0.161	0.003	b
H	0.0542945	0.0458238	0.0479275	0.0451435	0.0477291	0.0533828	0.037725	0.0562716	0.0469527	0.0500137	0.0419029	0.039584
