# Supplementary material for: Comparative transcriptomic analysis of Lactiplantibacillus plantarum RS66CD biofilm in high-salt conditions and planktonic cells
Source: PeerJ. 2020 Aug 3;8:e9639. doi: 10.7717/peerj.9639 (PMC7409786; doi:10.7717/peerj.9639)
Supplement: Supplemental Information 3 [file peerj-08-9639-s003.xlsx]

## Sheet: 0
	Well	Fluor	Target	Content	Sample	Cq	SQ
	A01	SYBR	16s 500	Unkn	test group	15.9191
	A02	SYBR	16s 500	Unkn	control group	16.5306
	A03	SYBR	16s	Unkn	test group	20.5027
	A04	SYBR	16s	Unkn	control group	20.6388
	A05	SYBR	16s 5000	Unkn	test group	24.394
	A06	SYBR	16s 1000	Unkn	control group	22.9486
	A07	SYBR		Unkn
	A08	SYBR		Unkn
	A09	SYBR		Unkn
	A10	SYBR		Unkn
	A11	SYBR		Unkn
	A12	SYBR		Unkn
	B01	SYBR	16s 500	Unkn	test group	15.1089
	B02	SYBR	16s 500	Unkn	control group	16.3824
	B03	SYBR	16s	Unkn	test group	19.6931
	B04	SYBR	16s	Unkn	control group	20.2928
	B05	SYBR	16s 5000	Unkn	test group	24.5632
	B06	SYBR	16s 1000	Unkn	control group	23.16
	B07	SYBR		Unkn
	B08	SYBR		Unkn
	B09	SYBR		Unkn
	B10	SYBR		Unkn
	B11	SYBR		Unkn
	B12	SYBR		Unkn
	C01	SYBR	16s 500	Unkn	test group	14.8092
	C02	SYBR	16s 500	Unkn	control group	16.1114
	C03	SYBR	16s	Unkn	test group	20.1144
	C04	SYBR	16s	Unkn	control group	20.1331
	C05	SYBR	16s 5000	Unkn	test group	24.3652
	C06	SYBR	16s 1000	Unkn	control group	22.7195
	C07	SYBR		Unkn
	C08	SYBR		Unkn
	C09	SYBR		Unkn
	C10	SYBR		Unkn
	C11	SYBR		Unkn
	C12	SYBR		Unkn
	D01	SYBR	16s 500	Unkn	test group	15.3272
	D02	SYBR	16s 500	Unkn	control group	16.4208
	D03	SYBR	16s	Unkn	test group	19.7472
	D04	SYBR	16s	Unkn	control group	20.3654
	D05	SYBR	16s 5000	Unkn	test group	24.8102
	D06	SYBR	16s 1000	Unkn	control group	23.0105
	D07	SYBR		Unkn
	D08	SYBR		Unkn
	D09	SYBR		Unkn
	D10	SYBR		Unkn
	D11	SYBR		Unkn
	D12	SYBR		Unkn
	E01	SYBR	16s 500	Unkn	test group	15.078
	E02	SYBR	16s 500	Unkn	control group	16.1702
	E03	SYBR	16s	Unkn	test group	19.5804
	E04	SYBR	16s	Unkn	control group	20.3631
	E05	SYBR	16s 5000	Unkn	test group	24.5491
	E06	SYBR	16s 1000	Unkn	control group	22.73
	E07	SYBR		Unkn
	E08	SYBR		Unkn
	E09	SYBR		Unkn
	E10	SYBR		Unkn
	E11	SYBR		Unkn
	E12	SYBR		Unkn
	F01	SYBR		Unkn
	F02	SYBR		Unkn
	F03	SYBR		Unkn
	F04	SYBR		Unkn
	F05	SYBR		Unkn
	F06	SYBR		Unkn
	F07	SYBR		Unkn
	F08	SYBR		Unkn
	F09	SYBR		Unkn
	F10	SYBR		Unkn
	F11	SYBR		Unkn
	F12	SYBR		Unkn
	G01	SYBR		Unkn
	G02	SYBR		Unkn
	G03	SYBR		Unkn
	G04	SYBR		Unkn
	G05	SYBR		Unkn
	G06	SYBR		Unkn
	G07	SYBR		Unkn
	G08	SYBR		Unkn
	G09	SYBR		Unkn
	G10	SYBR		Unkn
	G11	SYBR		Unkn
	G12	SYBR		Unkn
	H01	SYBR		Unkn
	H02	SYBR		Unkn
	H03	SYBR		Unkn
	H04	SYBR		Unkn
	H05	SYBR		Unkn
	H06	SYBR		Unkn
	H07	SYBR		Unkn
	H08	SYBR		Unkn
	H09	SYBR		Unkn
	H10	SYBR		Unkn
	H11	SYBR		Unkn
	H12	SYBR		Unkn
	A04	SYBR	ftsH	Unkn	control group	36.8477
	A05	SYBR	ftsH	Unkn	test group	34.1445
	C05	SYBR	ftsH	Unkn	test group	35.51
	D04	SYBR	ftsH	Unkn	control group	32.9361
	E04	SYBR	ftsH	Unkn	control group	34.4699
	E05	SYBR	ftsH	Unkn	test group	33.3648
	A02	SYBR	GroEL 100	Unkn	control group	28.1677
	A03	SYBR	GroEL 100	Unkn	test group	26.1035
	B02	SYBR	GroEL 100	Unkn	control group	28.4333
	B03	SYBR	GroEL 100	Unkn	test group	26.6779
	C02	SYBR	GroEL 100	Unkn	control group	28.4474
	C03	SYBR	GroEL 100	Unkn	test group	26.4335
	D02	SYBR	GroEL 100	Unkn	control group	28.6961
	D03	SYBR	GroEL 100	Unkn	test group	26.5272
	E02	SYBR	GroEL 100	Unkn	control group	28.2315
	E03	SYBR	GroEL 100	Unkn	test group	26.4784
	A02	SYBR	gyrB	Unkn	test group	21.2727
	A03	SYBR	gyrB	Unkn	control group	21.79
	B02	SYBR	gyrB	Unkn	test group	21.2622
	B03	SYBR	gyrB	Unkn	control group	21.92
	C02	SYBR	gyrB	Unkn	test group	21.2506
	C03	SYBR	gyrB	Unkn	control group	21.76
	D02	SYBR	gyrB	Unkn	test group	21.4858
	D03	SYBR	gyrB	Unkn	control group	21.67
	E02	SYBR	gyrB	Unkn	test group	21.2826
	E03	SYBR	gyrB	Unkn	control group	21.79
	F02	SYBR	gyrB	Unkn	test group	21.7524
	F03	SYBR	gyrB	Unkn	control group	21.89
	A02	SYBR	fabz1	Unkn	test group	32.1632
	A03	SYBR	fabz1	Unkn	control group	33.5435
	B02	SYBR	fabz1	Unkn	test group	30.2161
	B03	SYBR	fabz1	Unkn	control group	34.3634
	C02	SYBR	fabz1	Unkn	test group	31.684
	C03	SYBR	fabz1	Unkn	control group	32.8409
	D02	SYBR	fabz1	Unkn	test group	31.2321
	D03	SYBR	fabz1	Unkn	control group	32.8226
	B07	SYBR	fabZ2	Unkn-05	control group	28.6448
	B08	SYBR	fabZ2	Unkn-05	control group	28.5011
	B09	SYBR	fabZ2	Unkn-05	control group	28.0205
	C07	SYBR	fabZ2	Unkn-09	test group	25.77
	C08	SYBR	fabZ2	Unkn-09	test group	26.18
	C09	SYBR	fabZ2	Unkn-09	test group	26.15
	A03	SYBR	Alr	Unkn	test group	26.4737
	A04	SYBR	Alr	Unkn	control group	29.998
	B03	SYBR	Alr	Unkn	test group	26.8174
	B04	SYBR	Alr	Unkn	control group	24.8979
	C03	SYBR	Alr	Unkn	test group	28.008
	D04	SYBR	Alr	Unkn	control group	29.1088
	E04	SYBR	Alr	Unkn	control group	28.4136
